# Supplementary material for: A systematic review and meta-analysis of the global prevalence and determinants of COVID-19 vaccine acceptance and uptake in people living with HIV
Source: Springer Nature journal article supplement (doi:10.1038/s41562-023-01733-3), 2023-10-30
Supplement: MOESM1 [file 41562_2023_1733_MOESM1_ESM.pdf]

# **A systematic review and meta-analysis of the global prevalence and determinants of COVID-19 vaccine acceptance and uptake in people living with HIV**

---

In the format provided by the  
authors and unedited

# SECTION A

**Supplementary Table 1: Summary of the included studies**

| <b>Author &amp; publication year</b> | <b>Country</b> | <b>Study design</b> | <b>Sampling method</b> | <b>Study setting</b>                                               | <b>Study period</b>   | <b>Sample size [T; M (%)]</b> | <b>Age: mean (SD) or median [IQR]</b> | <b>Intention A (%); U (%)</b> | <b>Factors associated with vaccine acceptance, hesitancy, and uptake</b>                                                                                                                                                                                                                                       |
|--------------------------------------|----------------|---------------------|------------------------|--------------------------------------------------------------------|-----------------------|-------------------------------|---------------------------------------|-------------------------------|----------------------------------------------------------------------------------------------------------------------------------------------------------------------------------------------------------------------------------------------------------------------------------------------------------------|
| Su et al <sup>57</sup> /2022         | China          | CS                  | SRS (PS)               | Five cities (Chongzuo, Guigang, Laibin, Qinzhou, Yulin) in Guangxi | May 7 to June 1, 2021 | 903; 578 (64.0)               | NA                                    | A=658 (72.9); U=NA            | Ethnicity (Zhuang versus Han), the higher level of education and believing that COVID-19 vaccination does not affect ART efficacy were associated with higher acceptance. The perception that COVID-19 vaccination is unsafe and less effective among PLHIV are associated with lower acceptance.              |
| Buckley et al <sup>58</sup> /2022    | US             | CS                  | CoS (NPS)              | Urban primary care clinic, New York City                           | March to May, 2021    | 223; NA                       | NA                                    | A=167 (74.89); U=79 (35.43)   | HIV control (undetectable VL less than 200), and age 35 to 65, and greater than 65 years old versus less than 35 years old were significantly associated with greater vaccine acceptance. Identifying as Black (vs White) is associated with lower odds of acceptance.                                         |
| Zheng et al <sup>59</sup> /2021      | China          | CS                  | CoS (NPS)              | Mainland China (Online)                                            | February 2021         | 1295; 1295 (100)              | 29.3 [25.2–34.0]                      | A=NA; U=113 (8.7)             | Lower COVID-19 hesitancy was associated with high ART adherence, paying attention to information about the COVID-19 vaccine (often, and sometimes), preference toward domestic vaccines, perceived moderate and moderately severe or severe impact of SARS-CoV-2 on immunity, waiting for vaccination programs |

|                                  |        |    |           |                                                    |                            |                 |               |                          |                                                                                                                                                                                                                                                                                                                                                                                           |
|----------------------------------|--------|----|-----------|----------------------------------------------------|----------------------------|-----------------|---------------|--------------------------|-------------------------------------------------------------------------------------------------------------------------------------------------------------------------------------------------------------------------------------------------------------------------------------------------------------------------------------------------------------------------------------------|
|                                  |        |    |           |                                                    |                            |                 |               |                          | organized at the workplace and unawareness of where to get COVID-19 vaccine. A higher degree of vaccine hesitancy was positively correlated with concern about the efficacy and side effects of the COVID-19 vaccine                                                                                                                                                                      |
| Qi et al <sup>60</sup> /2021     | China  | CS | SbS (NPS) | Nationtion wide (Online)                           | May 1 to June 20, 2021     | 350; 335 (95.7) | 36.01 (9.64)  | A=280 (80); U=153 (43.7) | NA                                                                                                                                                                                                                                                                                                                                                                                        |
| Liu et al <sup>33</sup> /2021    | China  | CS | CoS (NPS) | Beijing Ditan Hospital, Capital Medical University | July 20 to August 20, 2021 | 378; 374 (98.9) | 35 (8)        | A=NA; U=219 (57.5)       | NA                                                                                                                                                                                                                                                                                                                                                                                        |
| Wu et al <sup>61</sup> /2022     | China  | CS | CoS (NPS) | Wuchang district CDC (Online)                      | April 4 to April 18, 2021  | 556; 515 (92.6) | 37.59 (11.45) | A=338 (60.8); U=NA       | PLHIV with comorbid illnesses, those who believe that their HIV would be worse if they were infected with SARS-CoV-2, and those who believe that their ART would be affected by COVID-19 pandemic were more willing to accept COVID-19 vaccination. Higher monthly income, and being heterosexual (vs. homosexual) were associated with lower willingness to accept COVID-19 vaccination. |
| Vallée et al <sup>62</sup> /2021 | France | CS | NPS       | Foch Hospital, Suresnes; (Online)                  | January, 2021              | 237; 181 (76.7) | 53 (NA)       | A=169 (71.3); U=NA       | Participant's concerns about their health, the requirement of mandatory COVID-19 vaccination, and presence of chronic disease(s) were independently associated with a higher likelihood of vaccine acceptance. Conversely,                                                                                                                                                                |

|                                    |                                                                                                                 |                              |     |                                                                                                            |                                  |                   |            |                                                                                      |                                                                                                                                                                                                                                                                                                      |
|------------------------------------|-----------------------------------------------------------------------------------------------------------------|------------------------------|-----|------------------------------------------------------------------------------------------------------------|----------------------------------|-------------------|------------|--------------------------------------------------------------------------------------|------------------------------------------------------------------------------------------------------------------------------------------------------------------------------------------------------------------------------------------------------------------------------------------------------|
|                                    |                                                                                                                 |                              |     |                                                                                                            |                                  |                   |            |                                                                                      | participants with concerns about the serious side effects of COVID-19 vaccines, and those who believe that they are already naturally protected against COVID-19 infection were more likely to be COVID-19 vaccine-hesitant.                                                                         |
| Menza et al <sup>63</sup> /2022    | US                                                                                                              | NR                           | NPS | Oregon                                                                                                     | May 10, 2021                     | 8022; 7095 (88.4) | NA         | A=NA; U=4943 (61.6)                                                                  | Older age, CD4 count or viral load measurement in 2020, participation in AIDS Drug Assistance Program (ADAP), and receiving Flu vaccination were associated with increased uptake. Being Hispanic/Latinx, male homosexual, injection drug user, and rural resident are associated with lower uptake. |
| Ekstrand et al <sup>64</sup> /2021 | India                                                                                                           | NR                           | NPS | Kamtaka state; Telephone interview                                                                         | January 18 and February 19, 2021 | 438; (212 61.6)   | 39.5 (8.8) | A=270 (61.6)                                                                         | Fear of vaccine side effects, having little/no confidence that vaccine is safe, having little/no confidence that vaccine protects against COVID-19, number of sources on vaccine information, and not knowing about anyone who died of COVID-19 are associated with increased odds of hesitancy.     |
| Fulda et al <sup>65</sup> /2022    | Multicontinent (Brazil, Botswana, Canada, Haiti, India, Peru, South Africa, Spain, Thailand, Uganda, the United | NR (secondary data analysis) | PS  | Brazil (n = 1042), Botswana (n = 273), Canada (n = 123), Haiti (n = 136), India (n = 469), Peru (n = 142), | January 2021 to July 2021        | 6952              | NR         | U (Global)= 4519 (65); [United States (72), Peru (69), and Brazil (63), South Africa | Participants who received the COVID-19 vaccine were more likely to come from high-income countries; be white, male, or older; and have a high body mass index, higher atherosclerotic cardiovascular disease (ASCVD) risk score, and longer duration of ART.                                         |

|                                      |                       |     |           |                                                                                                                                     |                                   |                   |                    |                                             |                                                                                                                                                                                                                                                                                                                                                                                                       |
|--------------------------------------|-----------------------|-----|-----------|-------------------------------------------------------------------------------------------------------------------------------------|-----------------------------------|-------------------|--------------------|---------------------------------------------|-------------------------------------------------------------------------------------------------------------------------------------------------------------------------------------------------------------------------------------------------------------------------------------------------------------------------------------------------------------------------------------------------------|
|                                      | States, and Zimbabwe) |     |           | South Africa (n = 527), Spain (n = 198), Thailand (n = 582), Uganda (n = 175), the United States (n = 3162), and Zimbabwe (n = 123) |                                   |                   |                    | (18), Uganda (3), and Haiti (0); others=NA] |                                                                                                                                                                                                                                                                                                                                                                                                       |
| Shrestha et al <sup>66</sup> /2022   | US                    | CS  | CoS (NPS) | Nationwide (Online)                                                                                                                 | December 6 2020 to January 8 2021 | 1030; 924 (89.7)  | 53.0 [60.0 – 41.0] | NA                                          | Being Black, single, politically conservative, concerned about side-effects, concerned about safety, and worried that the vaccine will not be effective are associated with a higher likelihood of hesitancy. Participants with liberal political orientation and those who were male, White, and university graduates and had a CD4 count of over 200 cells/mm3 had a lower likelihood of hesitancy. |
| Al-Yammahi et al <sup>67</sup> /2021 | Ireland               | RCR | NA        | Beaumont Hospital (Onsite)                                                                                                          | April 2021                        | 40; 20 (53)       | NA                 | A=28 (70.0); U=NA                           | NA                                                                                                                                                                                                                                                                                                                                                                                                    |
| Yang et al <sup>68</sup> /2022       | China                 | CS  | CoS (NPS) | North (Tianjin, Beijing),                                                                                                           | January and                       | 2740; 2588 (94.5) | 838 (30.6) are 18- | A=NA; U=170 (6.2)                           | Being among those prioritized to receive vaccination, receiving advice from staff supporting COVID-19 vaccination, being                                                                                                                                                                                                                                                                              |

|                                   |          |    |          |                                                                                      |                           |                 |             |                    |                                                                                                                                                                                                                                                                                                                                                                                                            |
|-----------------------------------|----------|----|----------|--------------------------------------------------------------------------------------|---------------------------|-----------------|-------------|--------------------|------------------------------------------------------------------------------------------------------------------------------------------------------------------------------------------------------------------------------------------------------------------------------------------------------------------------------------------------------------------------------------------------------------|
|                                   |          |    |          | Northeast (Shenyang, Hohhot), East (Nanjing), (Nanning, Guangzhou, Shenzhen). Online | February 2021             |                 | 29 years    |                    | exposed to groups supporting COVID-19 vaccination among PLHIV on the internet/social media, being cohabited/married with an opposite-sex partner, and having positive attitudes toward COVID-19 vaccination, were associated with a higher likelihood of vaccine uptake. Having negative attitudes toward COVID-19 vaccination and lacking a full-time job were negatively associated with vaccine uptake. |
| Mesfin et al <sup>69</sup> /2021  | Ethiopia | CS | SyS (PS) | Butajira General Hospital (Onsite)                                                   | March 1 to April 28, 2021 | 398; 236 (59)   | 32.15 (5.1) | A=134 (33.7); U=NA | Having a chronic illness, being male, and having good knowledge about COVID-19 practice were associated with higher odds of acceptance.                                                                                                                                                                                                                                                                    |
| Kaida et al <sup>32</sup> /2022   | Canada   | CS | NR (PS)  | British Columbia (Online)                                                            | August 20-March 1, 2021   | 69; 3 (4.3)     | 49.9 (11.4) | A=45 (65.2); U=NA  | Factors associated with intention to receive the COVID-19 vaccine included being older, reporting one or more chronic health condition, and being strongly influenced by direct and indirect social norms that encourage vaccination. Lack of confidence in the COVID-19 vaccine was associated with a lower likelihood of intention to vaccinate.                                                         |
| Iliyasu et al <sup>70</sup> /2022 | Nigeria  | CS | SyS (PS) | Aminu Kano Teaching Hospital (Onsite)                                                | March 2021                | 344; 153 (44.5) | 39.2 (9.68) | A=159 (46.2); U=NA | Being non-Muslim, having high-risk perception, not being worried about vaccine-related infertility rumors and believing that antiretroviral drugs protect against COVID-19 were associated with a higher likelihood of acceptance. Not being concerned about the potential effects of COVID-19-HIV co-infection was associated with a decreased likelihood of acceptance.                                  |

|                                      |       |    |           |                                          |                                         |                          |                 |                                      |                                                                                                                                                                                                                                                                                                                                                                                                                                                                                                            |
|--------------------------------------|-------|----|-----------|------------------------------------------|-----------------------------------------|--------------------------|-----------------|--------------------------------------|------------------------------------------------------------------------------------------------------------------------------------------------------------------------------------------------------------------------------------------------------------------------------------------------------------------------------------------------------------------------------------------------------------------------------------------------------------------------------------------------------------|
| Chai et al <sup>71</sup><br>/2022    | China | CS | CLS (PS)  | Five metropolit<br>an cities<br>(Online) | January<br>2021 and<br>February<br>2021 | 1735;<br>1638<br>(94.41) | NA              | A=1013<br>(58.3);<br>U=NA            | NA                                                                                                                                                                                                                                                                                                                                                                                                                                                                                                         |
| Jaiswal et al <sup>72</sup><br>/2022 | US    | CS | SRS (PS)  | US/US<br>territories<br>(Online)         | March<br>and May<br>2021                | 496;<br>226<br>(45.6)    | 50.08<br>(0.61) | A=429<br>(86.5);<br>U= 319<br>(64.3) | Having at least a bachelor's degree is associated with a higher likelihood of uptake. While higher levels of COVID-19 vaccine hesitancy scores are associated with a lower likelihood of willingness to accept the vaccine.                                                                                                                                                                                                                                                                                |
| Jones et al <sup>73</sup><br>/2021   | US    | CS | CoS (NPS) | Miami                                    | August to<br>November<br>2020.          | 94; 23<br>(60.5)         | 54.4<br>(11.3)  | A=51<br>(54.3);<br>U=NA              | Participants who agreed or strongly agreed that vaccines are important for health, those who agreed or strongly agreed that vaccines are effective, those who agreed or strongly agreed that vaccine-related information is trustworthy and reliable, those who agreed or strongly agreed with following doctors' recommendations regarding vaccines, and those who agreed or strongly agreed that getting vaccinated protects them from the disease had higher odds of willingness to accept the vaccine. |
| Zhao et al <sup>74</sup><br>/2021    | China | CS | CoS (NPS) | Nationwid<br>e (Online)                  | 7 and 23<br>February<br>2021            | 1618;<br>1541<br>(95.2)  | NA              | A=NA;<br>U= 527<br>(32.6)            | PLHIV with a higher level of education, those who received pneumonia or influenza vaccine in the past 3 years, those engaged in occupations with a high COVID-19 infection risk, those who believed in COVID-19 vaccine's effectiveness, and those who received COVID-19 vaccine information from the media were more likely to be vaccinated. Being concerned with adverse reactions, disclosure of participant's HIV status, and vaccine's adverse effect on HIV progression,                            |

|                                          |                                 |    |           |                                       |                                  |                   |              |                              |                                                                                                                                                                                                                                                                                                                                                                                                                            |
|------------------------------------------|---------------------------------|----|-----------|---------------------------------------|----------------------------------|-------------------|--------------|------------------------------|----------------------------------------------------------------------------------------------------------------------------------------------------------------------------------------------------------------------------------------------------------------------------------------------------------------------------------------------------------------------------------------------------------------------------|
|                                          |                                 |    |           |                                       |                                  |                   |              |                              | as well as the presence of comorbidities, being unmarried and older age were associated with a lower likelihood of being vaccinated                                                                                                                                                                                                                                                                                        |
| Huang et al <sup>75</sup> /2021          | China                           | CS | CoS (NPS) | Nationwide (Online)                   | January and February 2021        | 2570; 2431 (94.6) | NR           | A=1470 (57.2); U=NA          | Factors associated with a higher likelihood of acceptance included, positive attitude to COVID-19 vaccine, perceived support from valued contacts, source of information on COVID-19 vaccination (including doctors, staff of organizations offering services to PLHIV, family members and friends, and PLHIV peers). A lower likelihood of acceptance was associated with negative attitudes toward COVID-19 vaccination. |
| Govere-Hwenje et al <sup>76</sup> /2022  | South Africa                    | CS | SRS (PS)  | KwaZulu-Natal province                | September 2020 and January 2021  | 213; 60 (28)      | 35 [29-43]   | A=121 (57); U=NA             | Older age was associated with the likelihood of acceptance. On the other hand, higher COVID-19-related mistrust and having social media as the source of information about COVID-19 were associated with a lower likelihood of acceptance.                                                                                                                                                                                 |
| Ortiz-Martínez et al <sup>77</sup> /2022 | Latin America                   | CS | CoS (NPS) | Online                                | February to May 2021             | 528; 506 (95.83)  | 30 (27-36)   | A=460 (87.12); U=NA          | NA.                                                                                                                                                                                                                                                                                                                                                                                                                        |
| Davtyan et al <sup>78</sup> /2022        | US                              | CS | NPS       | Coachella Valley, California (online) | September 2020 and February 2021 | 114; 81 (95)      | 62.22 (7.20) | A=86 (75); U=NA              | Female and unemployed PLHIV had a lower likelihood of acceptance.                                                                                                                                                                                                                                                                                                                                                          |
| Mohamed et al <sup>79</sup> /2022        | Egypt, Tunisia and Saudi Arabia | CS | PQS (NPS) | Egypt 227 (42%), Saudi Arabia 184     | March 2021 and August 2021       | 540; 389 (72)     | NA           | A= 349 (64.6); U= 104 (19.3) | Factors associated with a higher likelihood of acceptance included being less worried to contract COVID-19 after vaccination, the belief the vaccination prevents COVID-19, and doctor's                                                                                                                                                                                                                                   |

|                                   |           |    |           |                                                               |                                  |                  |                |                            |                                                                                                                                                                                                                                                                                                                                                                                                                                                                                                                                                |
|-----------------------------------|-----------|----|-----------|---------------------------------------------------------------|----------------------------------|------------------|----------------|----------------------------|------------------------------------------------------------------------------------------------------------------------------------------------------------------------------------------------------------------------------------------------------------------------------------------------------------------------------------------------------------------------------------------------------------------------------------------------------------------------------------------------------------------------------------------------|
|                                   |           |    |           | (34.4%), Tunisia 127 (23.5%). Online                          |                                  |                  |                |                            | advice to vaccinate. While residing in rural settings, the belief that ART prevents COVID-19, skepticism about the vaccine effectiveness, and having a CD4 count assessed within the previous year were associated with a lower likelihood of acceptance.                                                                                                                                                                                                                                                                                      |
| Kabir et al <sup>80</sup> /2022   | Nigeria   | CS | CoS (NPS) | Six ART clinics (2 from Kano state, and four from Yobe state) | October 11 2021 February 24 2022 | 763; 171 (38.18) | 39.76 (10.75)  | A=382 (50.1); U=103 (13.5) | Older age, male sex, unemployed, attending ART a town-located ART clinic, perceived high COVID-19 susceptibility and having a history of adverse effects of ART drug were associated with a lower likelihood of hesitancy. Conversely, compared to those attending General Hospital Gashua, participants attending the ART clinic at Infectious Disease Hospital Kano. Murtala Muhammad Specialist Hospital Kano, and Yobe State Specialist Hospital Damaturu, all located in metropolitan cities, had significantly higher odds of hesitancy. |
| Donohue et al <sup>81</sup> /2021 | Ireland   | CS | NA        | Galway hospital (Onsite)                                      | December 10 2020 to April 1 2021 | 51; 35 (68.6)    | NA             | A=48 (94.1); U=NA          | NA                                                                                                                                                                                                                                                                                                                                                                                                                                                                                                                                             |
| Holt et al <sup>82</sup> /2022    | Australia | CS | NPS       | Nationwide (Online)                                           | April–June 2021                  | 95; NA           | NA             | A=77 (81.1); U=42 (44.2)   | NA                                                                                                                                                                                                                                                                                                                                                                                                                                                                                                                                             |
| Muhindo et al <sup>83</sup> /2022 | Uganda    | CS | NPS       | Six ART clinics (Komamb                                       | January to April 2022            | 767; 282 (37)    | Women:33 [ 28– | A=703 (91.7);              | Attainment of secondary education, older age being, belief in the benefit of vaccination, belief in the safety of COVID-19 vaccines for PLHIV                                                                                                                                                                                                                                                                                                                                                                                                  |

|                                       |                |    |           |                                                                          |                                   |                  |                      |                    |                                                                                                                                                                                                                                                                                                                                         |
|---------------------------------------|----------------|----|-----------|--------------------------------------------------------------------------|-----------------------------------|------------------|----------------------|--------------------|-----------------------------------------------------------------------------------------------------------------------------------------------------------------------------------------------------------------------------------------------------------------------------------------------------------------------------------------|
|                                       |                |    |           | oga, Kisenyi, Kiswa, Kitebi, Kawaala, and Kasangati) in Kampala (Onsite) |                                   |                  | 40]; men: 40 [34–47] | U=534 (70.80)      | and their ease of accessibility were associated with a higher likelihood of acceptance. Also, the perceived benefit of the vaccination for PLHIV, belief in the safety of the vaccine in PLHIV, ease of access, being unemployed, being female, and being tested before for COVID-19 are associated with a higher likelihood of uptake. |
| Swendeman et al <sup>84</sup> /2022   | US             | CS | NPS       | Los Angeles and New Orleans (Online)                                     | October 2020                      | 52; NA           | NA                   | A=32 (61.5); U=NA  |                                                                                                                                                                                                                                                                                                                                         |
| Wickersham et al <sup>85</sup> /2022  | US             | CS | NPS       | Nationwide (Online)                                                      | December 6 2020 to January 8 2021 | 1030; 924 (89.7) | 50.7 (12.5)          | A=858 (83.8); U=NA | Being black, politically conservative, low income were associated with a lower likelihood of acceptance. On the other hand, being vaccinated annually against influenza, and being politically liberal were associated with a higher willingness to accept the vaccine.                                                                 |
| Prestage et al <sup>86</sup> /2022    | Australia      | CS | CoS (NPS) | Nationwide (Online)                                                      | January 17 2021 to June 22 2021   | 57; NA           | NA                   | A=NA; U=35 (61.4); | NA                                                                                                                                                                                                                                                                                                                                      |
| Siewe Fodjo et al <sup>87</sup> /2021 | Multicontinent | CS | NPS       | Multinational (Online)                                                   | July 20-November 30 2020          | 247; NA          | 44.5 (13.2)          | A=188 (76.1); U=NA | NA                                                                                                                                                                                                                                                                                                                                      |

|                                   |                   |    |           |                                                                                                      |                           |                  |             |                     |                                                                                                                                                                                                                                |
|-----------------------------------|-------------------|----|-----------|------------------------------------------------------------------------------------------------------|---------------------------|------------------|-------------|---------------------|--------------------------------------------------------------------------------------------------------------------------------------------------------------------------------------------------------------------------------|
| Folayan et al <sup>88</sup> /2022 | Nigeria           | CS | SbS (NPS) | Adamawa, Akwa Ibom, Anambra, Benue, Kaduna, Lagos, Enugu, Gombe, Nassarawa and Niger (Online/Onsite) | June to October 2021      | 2024; NA         | NA          | A=1621 (80.1); U=NA | NA                                                                                                                                                                                                                             |
| Bogart et al <sup>89</sup> /2022  | US                | CS | CoS (NPS) | Los Angeles County, California (Onsite)                                                              | May to July, 2020         | 101; 88 (87)     | 50.3 (11.5) | A=69 (78.0); U=NA   | NA                                                                                                                                                                                                                             |
| Lyons et al <sup>90</sup> /2023   | Trinidad & Tobago | CS | CoS (NPS) | Medical Research Foundation of Trinidad and Tobago (MRFTT) (Onsite)                                  | August and September 2021 | 272; 135 (49.6)  | 41 (13.0)   | A=163 (59.9); U=NA  | Bein females, and having a mixed ethnicity were associated with lower acceptance. On the other hand, Indo-Trinidadians, non-heterosexuals, and being confident in the COVID-19 vaccine were associated with higher acceptance. |
| Madzima et al <sup>91</sup> /2022 | Zimbabwe          | CS | StS (PS)  | Nationwide (Onsite)                                                                                  | October 2020 to           | 480; 142 (32.49) | NA          | A=NA; U=280 (64.07) | NA                                                                                                                                                                                                                             |

|                                      |         |    |           |                                                                                    |                               |                 |               |                              |                                                                                                                                   |
|--------------------------------------|---------|----|-----------|------------------------------------------------------------------------------------|-------------------------------|-----------------|---------------|------------------------------|-----------------------------------------------------------------------------------------------------------------------------------|
|                                      |         |    |           |                                                                                    | November 2021.                |                 |               |                              |                                                                                                                                   |
| Chaudhuri et al <sup>92</sup> /2022  | India   | CS | SnS (NPS) | Chittoor district of Andhra Pradesh (Online/onsite)                                | September to October 2021     | 247; 106 (42.9) | 40 (11)       | A=218 (88.26); U=195 (78.95) | NA                                                                                                                                |
| Bert et al <sup>93</sup> /2022       | Italy   | CS | NPS       | Amedeo di Savoia Hospital in Turin (Onsite)                                        | November 2021 to April 2022   | 160; 133 (83.1) | 49.97 (11.82) | A=149 (93.13); U=137 (86.2)  | NA                                                                                                                                |
| Shallangwa et al <sup>94</sup> /2023 | Nigeria | CS | NPS       | State Specialist Hospital Maiduguri (Onsite)                                       | January 4 to February 25 2022 | 344; 102 (29.7) | NA            | A=115 (33.4); U=88 (26.6)    | No significant relationship                                                                                                       |
| Mchawa et al <sup>95</sup> /2023     | Malawi  | CS | CoS (NPS) | Mpemba health center in Traditional Authority Somba, in Blantyre district (Onsite) | May to September 2022         | 341; 142 (41.6) | NA            | A=150 (43.99); U=NA          | Having higher levels of knowledge, good attitude and trust in the COVID-19 vaccination were negatively associated with hesitancy. |

|                                      |       |    |           |                                                        |                                |                          |    |                                |                                                                                                                                                                                                                                                                                                                                                                                      |
|--------------------------------------|-------|----|-----------|--------------------------------------------------------|--------------------------------|--------------------------|----|--------------------------------|--------------------------------------------------------------------------------------------------------------------------------------------------------------------------------------------------------------------------------------------------------------------------------------------------------------------------------------------------------------------------------------|
| Sun et al <sup>96</sup> /2022        | China | CS | NPS       | PLA General Hospital (Onsite)                          | June to December 2021          | 169; NA                  | NA | A=102 (60.36); U=NA            | Age of the participants vaccine safety were associated with intention to vaccinate against COVID-19.                                                                                                                                                                                                                                                                                 |
| Singh et al <sup>97</sup> /2023      | India | CS | CsS (NPS) | Northe India (Onsite)                                  | May and June 2021              | 300; 180 (59.33)         | 40 | A=60 (20.0); U=NA              | NA                                                                                                                                                                                                                                                                                                                                                                                   |
| Lv et al <sup>98</sup> /2023         | China | CS | NPS       | Mainland China (Online)                                | January 2022 to March 2022     | 1424; 1295 (90.9)        | NA | A=1316 (92.42); U=1258 (88.34) | Being older, having lower academic level, having comorbidity, having lower CD4+ count, having higher levels of anxiety and despair, and high risk perception were associated with higher levels of COVID-19 vaccine hesitancy. Also, lower vaccine uptake were associated with having lower level of education, lower CD4 count, and having higher levels of anxiety and depression. |
| Ogaz et al <sup>99</sup> /2023       | UK    | CS | NPS       | Nationwide (Online)                                    | November to December 2021      | 120; NA                  | NA | A=NA;U=114 (95.0)              | NA                                                                                                                                                                                                                                                                                                                                                                                   |
| Rosenthal et al <sup>100</sup> /2023 | US    | RC | NR        | New York (Oline RCR)                                   | Through March 2022             | 101,205 ; 70,636 (69.8%) | NA | A=NA; U=72950 (72.08)          | NA                                                                                                                                                                                                                                                                                                                                                                                   |
| Hechter et al <sup>101</sup> /2023   | US    | RC | NR        | California, Colorado, Washington , Denver (Online RCR) | December 1 to December 31 2021 | 22,063; NA               | NA | A=NA; U= 19,966 (90.5)         | Being male, being Asian, and being vaccinated against influenza in the previous two years were associated with higher COVID-19 vaccination. While PLHIV having a CD4 count <200, and those who have failed to achieve viral suppression had lower vaccination.                                                                                                                       |

|                                      |           |        |          |                                                                                                                      |                                                           |                 |    |                    |                                                                                                                                                                                                    |
|--------------------------------------|-----------|--------|----------|----------------------------------------------------------------------------------------------------------------------|-----------------------------------------------------------|-----------------|----|--------------------|----------------------------------------------------------------------------------------------------------------------------------------------------------------------------------------------------|
| Baker et al <sup>102</sup> /2023     | US        | PC     | NR       | Maryland (Online RCR)                                                                                                | April 6 2021 to February 22 2022                          | 960; NA         | NA | A=NA; U=670 (70.0) | Being male, belonging to Black race, and HIV viral suppression (<400) were associated with higher COVID-19 vaccination completion. While being over 50 years was associated with lower completion. |
| Wicaksana et al <sup>103</sup> /2023 | Indonesia | CS     | SRS (PS) | Jakarta (Cipto Mangunkusumo Hospital, Dharmas National Cancer Hospital, and Kramat 128 Hospital) (Online and Onsite) | September to December 2021                                | 470; 358 (76.2) | NA | A=355; U=NA        | Determinants of intention to vaccinate include instrumental attitude, perceived behavioral control, and subjective norm.                                                                           |
| Strathdee et al <sup>104</sup> /2023 | US        | Cohort | NPS      | San Diego, California (Onsite)                                                                                       | October 2020 to September 2021 and through March 15, 2022 | 15; NA          | NA | A=NA; U=8          | NA                                                                                                                                                                                                 |

|                                       |              |        |           |                                                                                |                               |                  |             |                    |                                                                                                                                                                                                                           |
|---------------------------------------|--------------|--------|-----------|--------------------------------------------------------------------------------|-------------------------------|------------------|-------------|--------------------|---------------------------------------------------------------------------------------------------------------------------------------------------------------------------------------------------------------------------|
| Javanbakht et al <sup>105</sup> /2023 | US           | Cohort | CoS (NPS) | Baltimore, Chicago, Los Angeles, Miami, and Vancouver (Online)                 | May 2021 to January 2022      | 777; NA          | NA          | A=683; U=677       | NA                                                                                                                                                                                                                        |
| Costiniuk et al <sup>106</sup> /2023  | Canada       | CS     | NPS       | Nationwide (Online)                                                            | February to May 2022          | 246; 189 (76.8)  | 46.8 (14.0) | A=NA; U=219 (84.6) | Age per ten-year increase and higher level of education were associated with vaccination.                                                                                                                                 |
| Cummings et al <sup>107</sup> /2023   | Sierra Leone | CS     | CoS (NPS) | Connaught Hospital in Freetown (Onsite)                                        | April to June 2022            | 490; 140 (28.6)  | 38 (32-49)  | A=NA; U=85         | PLHIV who are Muslim and those residing in urban areas had higher COVID-19 vaccine hesitancy. While a past history of COVID-19 testing was associated with lower hesitancy.                                               |
| Tunta et al <sup>108</sup> /2023      | Ethiopia     | CS     | CsS (NPS) | Woldia comprehensive specialized hospital located, Northern Ethiopia. (Onsite) | February 15 to March 15, 2022 | 332; 128 (38.55) | NA          | A=220 (66.3); U=NA | Having poor knowledge and negative attitude toward COVID-19 was significantly associated with vaccine refusal. And rural residence was associated with lower likelihood of willingness to vaccinate against the COVID-19. |

**Keys:** ART, Antiretroviral therapy; CC, Case-Control; CIS, Clustered sampling; CoS, Convenient sampling; CsS, Consecutive Sampling; NA, Not available; NPS, Non-probability sampling; NS, Not Reported; PC, Prospective Cohort; PS, Probability sampling; PQS, Purposive quota sampling; RC, Retrospective Cohort; RCR, Retrospective charts review; SnS, Snowball sampling; SRS, Simple random sampling; StS, Stratified sampling; SyS, Systematic sampling.

## References (Numbered as within the main manuscript file)

32. Kaida A, Brotto LA, Murray MCM, et al. Intention to Receive a COVID-19 Vaccine by HIV Status Among a Population-Based Sample of Women and Gender Diverse Individuals in British Columbia, Canada. *AIDS Behav.* 2022;26(7):2242-2255. doi:10.1007/s10461-022-03577-w
33. Liu Y, Han J, Li X, et al. COVID-19 Vaccination in People Living with HIV (PLWH) in China: A Cross Sectional Study of Vaccine Hesitancy, Safety, and Immunogenicity. *Vaccines.* 2021;9(12):1458. doi:10.3390/vaccines9121458
57. Su J, Jia Z, Wang X, et al. Acceptance of COVID-19 vaccination and influencing factors among people living with HIV in Guangxi, China: a cross-sectional survey. *BMC Infect Dis.* 2022;22(1):471. doi:10.1186/s12879-022-07452-w
58. Buckley M, Shayani K, Spier D, Stefanov D, Ahmadi L. Attitudes Towards COVID-19 Vaccination in People Living with HIV (PLWHIV) at an Urban Primary Care Clinic. Published online May 23, 2022. Accessed June 16, 2022. <https://papers.ssrn.com/abstract=4113173>
59. Zheng W, Sun Y, Li H, et al. COVID-19 vaccine uptake and hesitancy among HIV-infected men who have sex with men in mainland China: a cross-sectional survey. *Hum Vaccines Immunother.* 2021;17(12):4971-4981. doi:10.1080/21645515.2021.1996152
60. Qi L, Yang L, Ge J, Yu L, Li X. COVID-19 Vaccination Behavior of People Living with HIV: The Mediating Role of Perceived Risk and Vaccination Intention. *Vaccines.* 2021;9(11):1288. doi:10.3390/vaccines9111288
61. Wu S, Ming F, Xing Z, et al. COVID-19 Vaccination Willingness Among People Living With HIV in Wuhan, China. *Front Public Health.* 2022;10:883453. doi:10.3389/fpubh.2022.883453
62. Vallée A, Fourn E, Majerholc C, Touche P, Zucman D. COVID-19 Vaccine Hesitancy among French People Living with HIV. *Vaccines.* 2021;9(4):302. doi:10.3390/vaccines9040302
63. Menza TW, Capizzi J, Zlot AI, Barber M, Bush L. COVID-19 Vaccine Uptake Among People Living with HIV. *AIDS Behav.* 2022;26(7):2224-2228. doi:10.1007/s10461-021-03570-9
64. Ekstrand ML, Heylen E, Gandhi M, Steward WT, Pereira M, Srinivasan K. COVID-19 Vaccine Hesitancy Among PLWH in South India: Implications for Vaccination Campaigns. *J Acquir Immune Defic Syndr 1999.* 2021;88(5):421-425. doi:10.1097/QAI.0000000000002803
65. Fulda ES, Fitch KV, Overton ET, et al. COVID-19 Vaccination Rates in a Global HIV Cohort. *J Infect Dis.* 2022;225(4):603-607. doi:10.1093/infdis/jiab575
66. Shrestha R, Meyer JP, Shenoi S, et al. COVID-19 Vaccine Hesitancy and Associated Factors among People with HIV in the United States: Findings from a National Survey. *Vaccines* 2022, 10, 424. Published online 2022.
67. Al-Yammahi A, Reynolds B, Crawford R, et al. Covid-19 Vaccine Uptake in People Living with HIV. :2.
68. Yang J, Yu M, Fu G, et al. COVID-19 Vaccination Uptake Among a Nationwide Sample of People Living With HIV During the Early Phase of Vaccine Rollout in China. *Front Med.* 2022;9:822680. doi:10.3389/fmed.2022.822680
69. Mesfin Y, Argaw M, Geze S, Zewdu BT. Factors Associated with Intention to Receive COVID-19 Vaccine Among HIV Positive

- Patients Attending ART Clinic in Southwest Ethiopia. *Patient Prefer Adherence*. 2021;15:2731-2738. doi:10.2147/PPA.S342801
70. Iliyasu Z, Kwaku AA, Umar AA, et al. Predictors of COVID-19 Vaccine Acceptability among Patients Living with HIV in Northern Nigeria: A Mixed Methods Study. *Curr HIV Res*. 2022;20(1):82-90. doi:10.2174/1570162X19666211217093223
  71. Chai R, Yang J, Zhang X, et al. Reasons for COVID-19 Vaccine Hesitancy Among Chinese People Living With HIV/AIDS: Structural Equation Modeling Analysis. *JMIR Public Health Surveill*. 2022;8(6):e33995. doi:10.2196/33995
  72. Jaiswal J, Krause KD, Martino RJ, et al. SARS-CoV-2 Vaccination Hesitancy and Behaviors in a National Sample of People Living with HIV. *AIDS Patient Care STDs*. 2022;36(1):34-44. doi:10.1089/apc.2021.0144
  73. Jones DL, Salazar AS, Rodriguez VJ, et al. Severe Acute Respiratory Syndrome Coronavirus 2: Vaccine Hesitancy Among Underrepresented Racial and Ethnic Groups With HIV in Miami, Florida. *Open Forum Infect Dis*. 2021;8(6):ofab154. doi:10.1093/ofid/ofab154
  74. Zhao H, Wang H, Li H, et al. Uptake and adverse reactions of COVID-19 vaccination among people living with HIV in China: a case-control study. *Hum Vaccines Immunother*. 2021;17(12):4964-4970. doi:10.1080/21645515.2021.1991183
  75. Huang X, Yu M, Fu G, et al. Willingness to Receive COVID-19 Vaccination Among People Living With HIV and AIDS in China: Nationwide Cross-sectional Online Survey. *JMIR Public Health Surveill*. 2021;7(10):e31125. doi:10.2196/31125
  76. Govere-Hwenje S, Jarolimova J, Yan J, et al. Willingness to accept COVID-19 vaccination among people living with HIV in a high HIV prevalence community. *BMC Public Health*. 2022;22(1):1239. doi:10.1186/s12889-022-13623-w
  77. Ortiz-Martínez Y, López-López MÁ, Ruiz-González CE, et al. Willingness to receive COVID-19 vaccination in people living with HIV/AIDS from Latin America. *Int J STD AIDS*. 2022;33(7):652-659. doi:10.1177/09564624221091752
  78. Davtyan M, Frederick T, Taylor J, Christensen C, Brown BJ, Nguyen AL. Determinants of COVID-19 vaccine acceptability among older adults living with HIV. *Medicine (Baltimore)*. 2022;101(31):e29907. doi:10.1097/MD.00000000000029907
  79. Mohamed R, White TM, Lazarus JV, et al. COVID-19 vaccine acceptance and associated factors among people living with HIV in the Middle East and North Africa region. *South Afr J HIV Med*. 2022;23(1):1391. doi:10.4102/sajhivmed.v23i1.1391
  80. Kabir Sulaiman S, Sale Musa M, Isma'il Tsiga-Ahmed F, et al. COVID-19 vaccine hesitancy among people living with HIV in a low-resource setting: A multi-center study of prevalence, correlates and reasons. *Vaccine*. 2023;41(15):2476-2484. doi:10.1016/j.vaccine.2023.02.056
  81. Donohue S, Boyle N, Holmes A. A Survey of the Potential Acceptance of a SARS-CoV-2 Vaccine Amongst People Living with HIV. *Ir Med J*. 114(9):P477.
  82. Holt M, MacGibbon J, Bavinton B, et al. COVID-19 Vaccination Uptake and Hesitancy in a National Sample of Australian Gay and Bisexual Men. *AIDS Behav*. 2022;26(8):2531-2538. doi:10.1007/s10461-022-03603-x
  83. Muhindo R, Okoboi S, Kiragga A, King R, Arinaitwe WJ, Castelnovo B. COVID-19 vaccine acceptability, and uptake among people living with HIV in Uganda. *PLOS ONE*. 2022;17(12):e0278692. doi:10.1371/journal.pone.0278692
  84. Swendeman D, Norwood P, Saleska J, et al. Vaccine Attitudes and COVID-19 Vaccine Intentions and Prevention Behaviors among Young People At-Risk for and Living with HIV in Los Angeles and New Orleans. *Vaccines*. 2022;10(3):413.

doi:10.3390/vaccines10030413

85. Wickersham JA, Meyer JP, Shenoi S, et al. Willingness to Be Vaccinated Against COVID-19 Among People With HIV in the United States: Results From a National Survey. *Front Med*. 2022;9:886936. doi:10.3389/fmed.2022.886936
86. Prestage G, Storer D, Jin F, et al. COVID-19 Vaccine Uptake and Its Impacts in a Cohort of Gay and Bisexual Men in Australia. *AIDS Behav*. 2022;26(8):2692-2702. doi:10.1007/s10461-022-03611-x
87. Siewe Fodjo JN, Faria de Moura Villela E, Van Hees S, Vanholder P, Reyntiens P, Colebunders R. Follow-Up Survey of the Impact of COVID-19 on People Living with HIV during the Second Semester of the Pandemic. *Int J Environ Res Public Health*. 2021;18(9):4635. doi:10.3390/ijerph18094635
88. Folayan MO, Arije O, Enemo A, et al. Associations between COVID-19 vaccine hesitancy and the experience of violence among women and girls living with and at risk of HIV in Nigeria. *Afr J AIDS Res*. 2022;0(0):1-11. doi:10.2989/16085906.2022.2118615
89. Bogart LM, Ojikutu BO, Tyagi K, et al. COVID-19 Related Medical Mistrust, Health Impacts, and Potential Vaccine Hesitancy Among Black Americans Living With HIV. *J Acquir Immune Defic Syndr 1999*. 2021;86(2):200-207. doi:10.1097/QAI.0000000000002570
90. Lyons N, Bhagwande B, Edwards J. Factors Affecting COVID-19 Vaccination Intentions among Patients Attending a Large HIV Treatment Clinic in Trinidad Using Constructs of the Health Belief Model. *Vaccines*. 2023;11(1):4. doi:10.3390/vaccines11010004
91. Madzima B, Makoni T, Mugurungi O, et al. The impact of the COVID-19 pandemic on people living with HIV in Zimbabwe. *Afr J AIDS Res*. 2022;21(2):194-200. doi:10.2989/16085906.2022.2103004
92. Chaudhuri. Vaccination against COVID-19 among people living with HIV: A cross-sectional survey in Chittoor District of Andhra Pradesh, India. Accessed June 16, 2022. <https://www.cmijournal.org/article.asp?issn=0973-4651;year=2022;volume=20;issue=1;spage=32;epage=36;aulast=Chaudhuri>
93. Bert F, Pivi A, Russotto A, et al. COVID-19 Vaccination among HIV+ Patients: An Italian Cross-Sectional Survey. *Vaccines*. 2022;10(9):1438. doi:10.3390/vaccines10091438
94. Shallangwa MM, Musa SS, Iwenya HC, Manirambona E, Iii DELP, Tukur BM. Assessment of COVID-19 vaccine hesitancy among people living with HIV/AIDS: a single-centered study. *PAMJ - One Health*. 2023;10(2). doi:10.11604/pamj-oh.2023.10.2.37945
95. Mchawa C, Zhang SS, Zhang WX, et al. Assessing SARS-CoV-2 vaccine hesitancy among the people living with and without HIV from May to September 2022 in Blantyre, Malawi. *Hum Vaccines Immunother*. 2023;0(0):2222052. doi:10.1080/21645515.2023.2222052
96. Sun YB. Awareness towards COVID-19 prevention and factors related to the willingness to receive COVID-19 vaccine among people living with HIV/AIDS. *Zhongguo Bingdubing Zazhi Chin J Viral Dis*. Published online 2022:349-349.
97. Singh AD, Upal N, Oberoi S, et al. Awareness and Hesitancy of COVID-19 and other Vaccines among People Living with HIV/AIDS Attending Antiretroviral Therapy (ART) Center in North India. *Indian J Community Med*. 2023;48(3):492.

doi:10.4103/ijcm.ijcm\_901\_22

98. Lv X, Zhao C, Song B, et al. COVID-19 vaccination in people living with HIV and AIDS (PLWHA) in China: A cross-sectional study. *Hum Vaccines Immunother.* 2023;0(0):2151798. doi:10.1080/21645515.2022.2151798
99. Ogaz D, Allen H, Reid D, et al. COVID-19 infection and vaccination uptake in men and gender-diverse people who have sex with men in the UK: analyses of a large, online community cross-sectional survey (RiiSH-COVID) undertaken November–December 2021. *BMC Public Health.* 2023;23(1):829. doi:10.1186/s12889-023-15779-5
100. Rosenthal EM, Patterson W, Chicoine J, et al. COVID-19 Vaccination and Hospitalization Among Persons Living With Diagnosed HIV in New York State. *J Acquir Immune Defic Syndr 1999.* 2023;93(2):92-100. doi:10.1097/QAI.0000000000003177
101. Hechter R, Qian L, Amy Liu IL, et al. COVID-19 Vaccine Coverage Among People With HIV in the Vaccine Safety Datalink. *Top Antivir Med.* Published online 2023:406-407.
102. Baker P, Cepeda J, Schluth C, et al. Time-to-Completion of Covid-19 Vaccination Primary Series Varies by HIV Viral Load Status Among People Who Inject Drugs in Baltimore, Maryland. Published online May 16, 2023. doi:10.2139/ssrn.4423541
103. Wicaksana B, Yuniastuti E, Shatri H, et al. Predicting Intention to Receive COVID-19 Vaccination in People Living with HIV using an Integrated Behavior Model. *Vaccines.* 2023;11(2):296. doi:10.3390/vaccines11020296
104. Strathdee SA, Abramovitz D, Vera CF, et al. Predictors of COVID-19 vaccine uptake among people who inject drugs. *Vaccine.* 2023;41(12):1916-1924. doi:10.1016/j.vaccine.2023.01.042
105. Javanbakht M, Khan L, Mustanski B, et al. Substance use and other factors associated with COVID-19 vaccine uptake among people at risk for or living with HIV: Findings from the C3PNO consortium. *Prev Med Rep.* 2023;35:102300. doi:10.1016/j.pmedr.2023.102300
106. Costiniuk CT, Singer J, Needham J, et al. Understanding COVID-19 Vaccine Confidence in People Living with HIV: A pan-Canadian Survey. *AIDS Behav.* 2023;27(8):2669-2680. doi:10.1007/s10461-023-03991-8
107. Cummings PE, Lakoh S, Yendewa SA, et al. Understanding COVID-19 Vaccine Uptake and Hesitancy Among People With HIV in Freetown, Sierra Leone: A Cross-sectional Study. Published online May 16, 2023:2023.05.11.23289882. doi:10.1101/2023.05.11.23289882
108. Tunta A, Shiferaw M, Mesele H, Kassahun W, Yehualaw F, Abera A. Willingness to take COVID-19 Vaccination among People Living with HIV/AIDS on Anti-Retroviral Therapy and Associated Factors in Woldia Comprehensive Specialized Hospital, Woldia, EthiopiaTanzania. *Int J Sex Transm Dis.* 2023;1(1):28-39.

## SECTION B

### Results of meta-analysis of COVID-19 vaccine acceptance and uptake using all studies

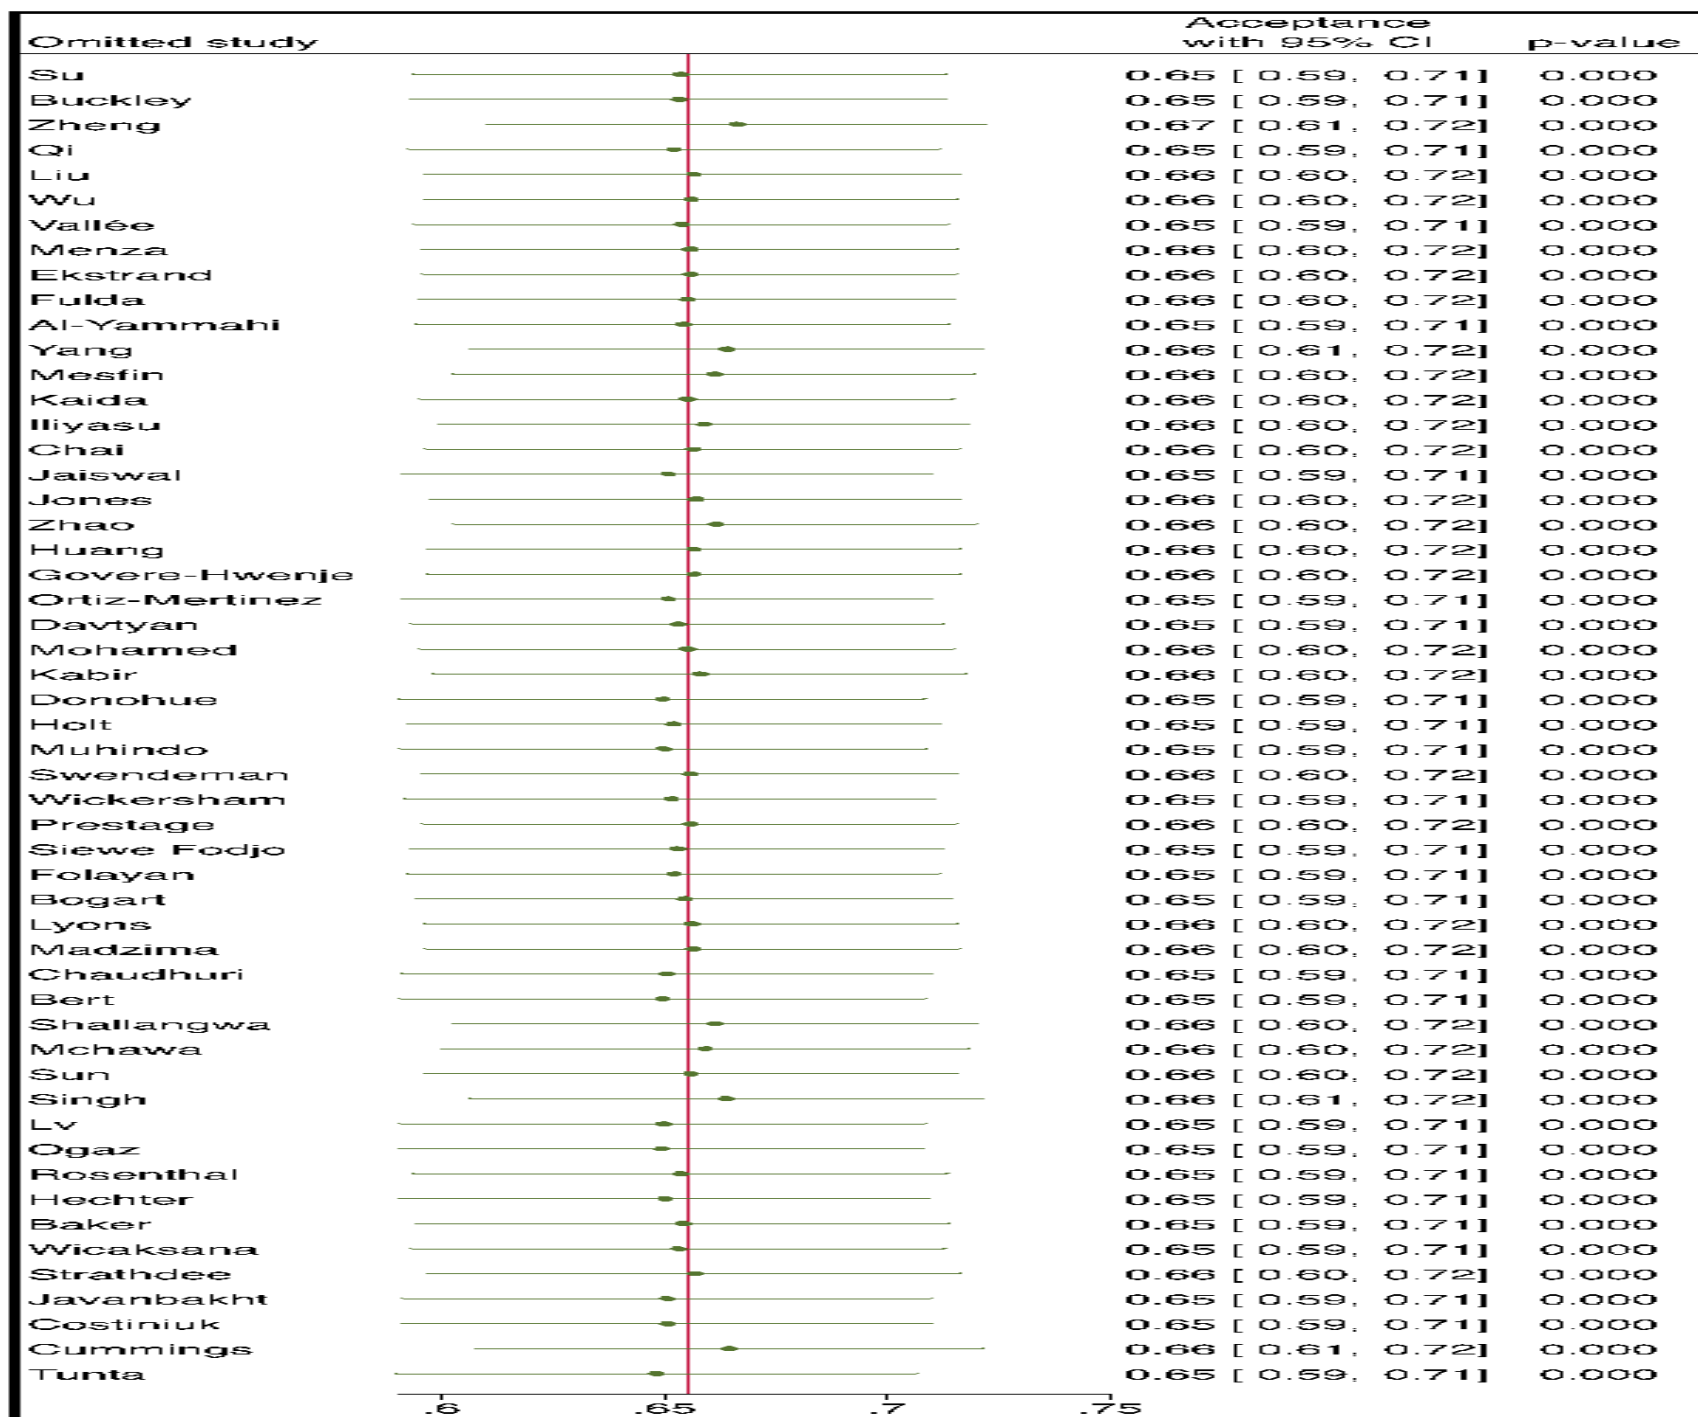

**Supplementary Figure. 1: Forest plot of sensitivity analyses for each study reporting the acceptance rate of the COVID-19 vaccine among PLHIV using random effects model meta-analysis. Each solid square represents the effect size of each characteristic, while the ends of the adjoining horizontal lines represent lower (left) and upper (right) confidence intervals. (n = 53 studies, N = 166,455 participants).**

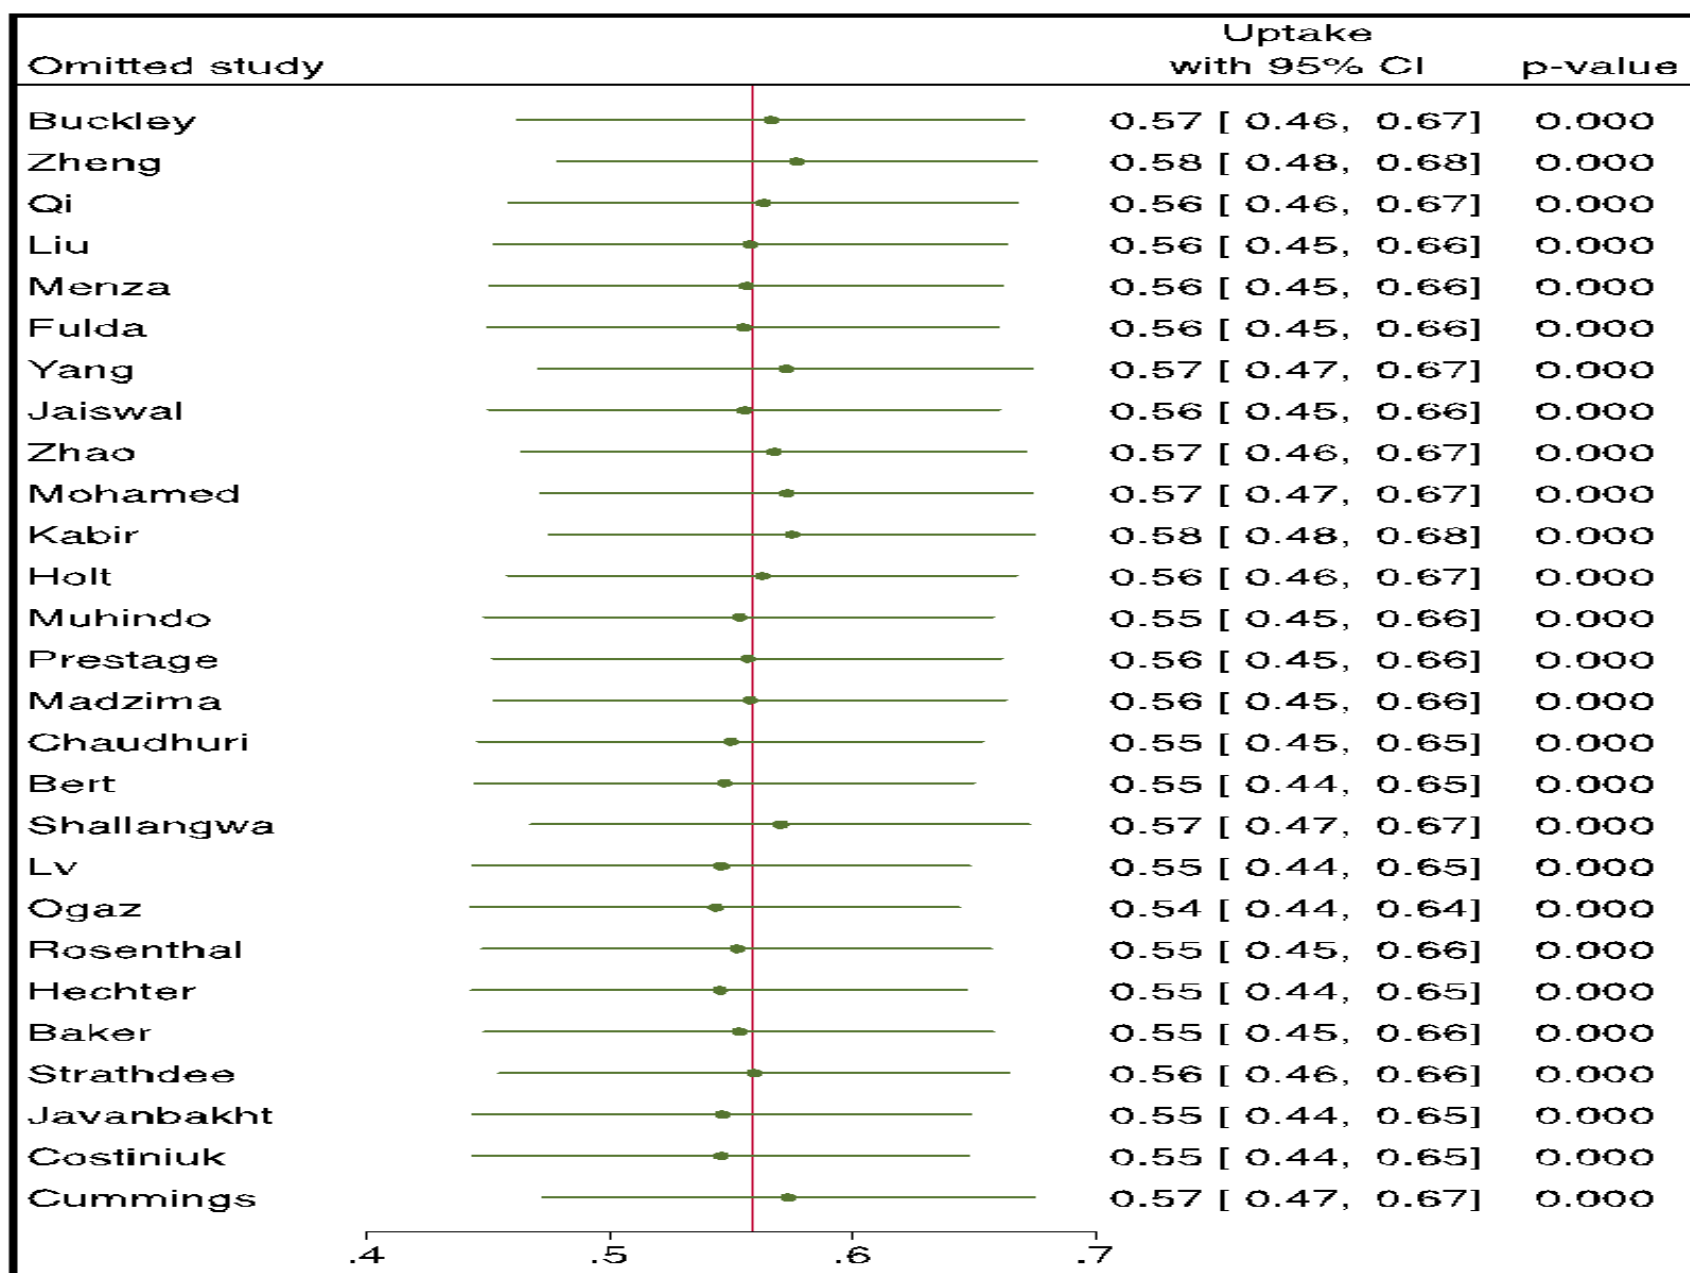

Random-effects REML model

**Supplementary Figure 2: Forest plot of sensitivity analyses for each study reporting the uptake rate of the COVID-19 vaccine among PLHIV using random effects model meta-analysis. Each solid square represents the effect size of each characteristic, while the ends of the adjoining horizontal lines represent lower (left) and upper (right) confidence intervals (n = 27 studies, N = 150,926 participants).**

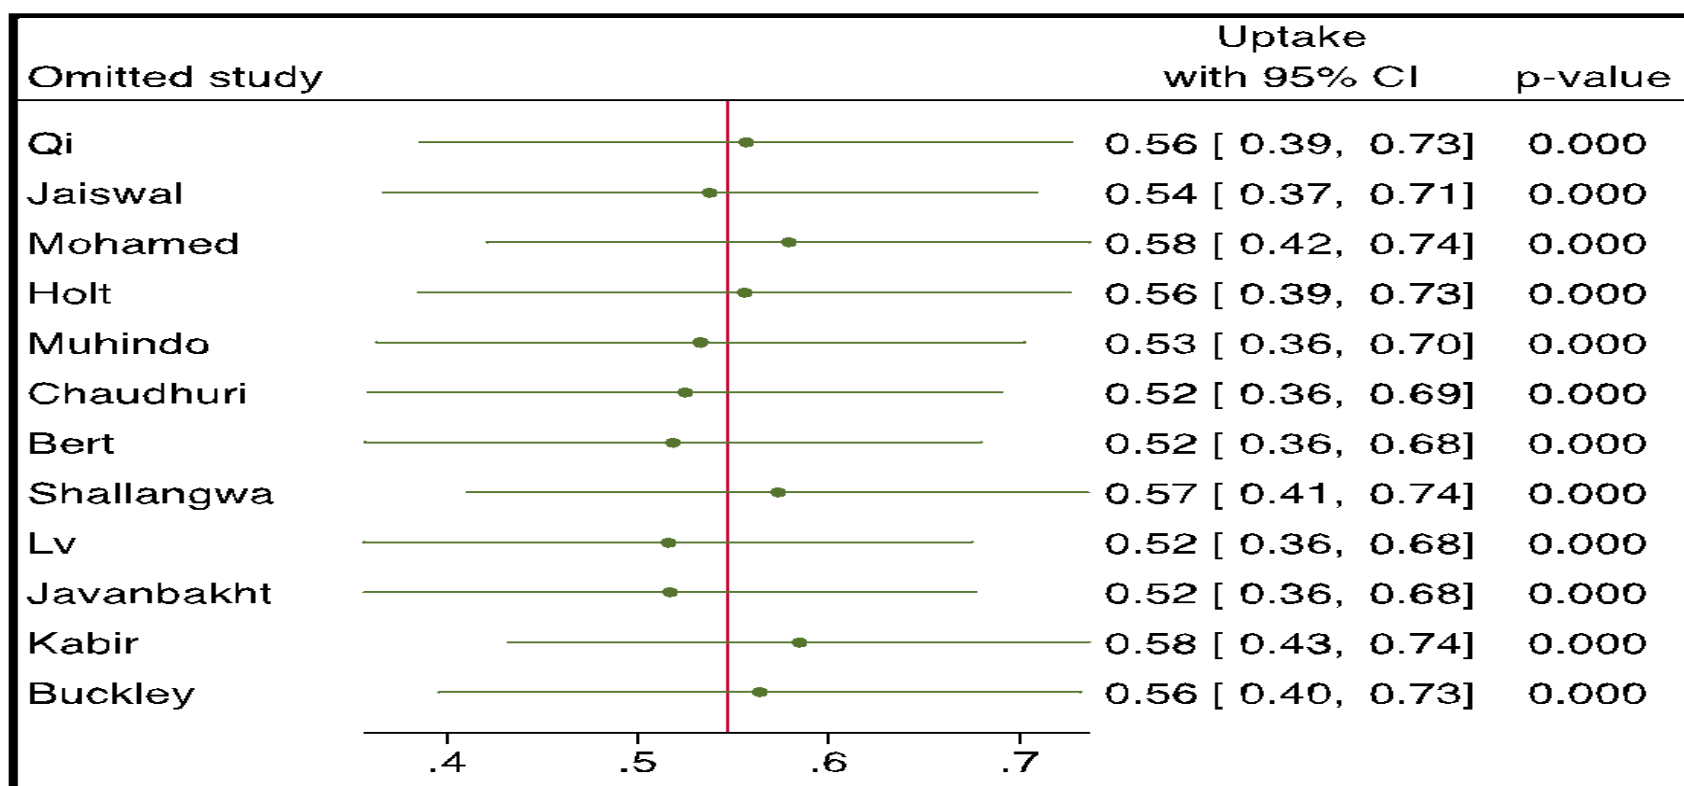

Random-effects REML model

**Supplementary Figure 3: Forest plot of sensitivity analyses for each study reporting the uptake rate of the COVID-19 vaccine among PLHIV who indicated acceptance using random effects model meta-analysis. Each solid square represents the effect**

size of each characteristic, while the ends of the adjoining horizontal lines represent lower (left) and upper (right) confidence intervals (n = 13 studies, N = 6,564 participants).

.

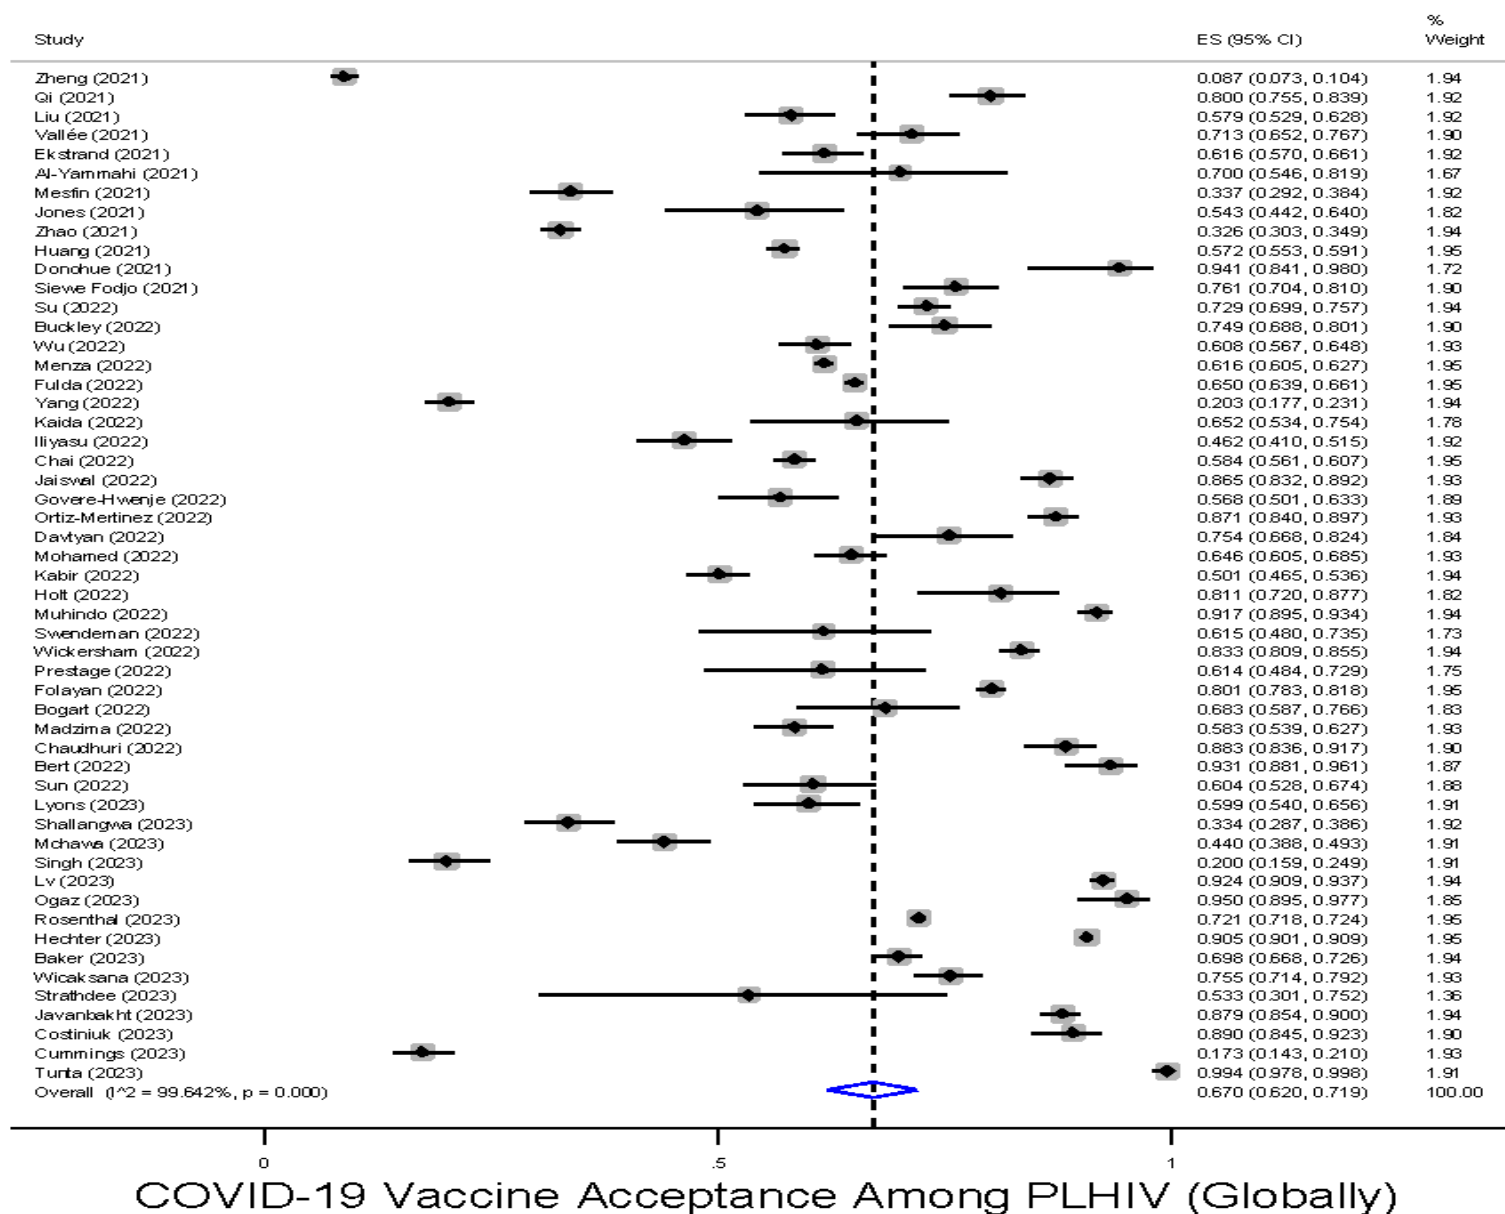

**Supplementary Figure 4: Forest plots of the results of random-effects model meta-analysis of the prevalence (%) of COVID-19 vaccine acceptance globally (n = 53 studies, N = 166,455 participants) pooled using inverse variance weights. Each black-colored solid square represents the effect size of each characteristic, while the ends of the adjoining horizontal lines represent lower (left) and upper (right) confidence intervals. The blue-colored hollow diamond at the bottom denotes the overall estimated effect size and the 95% CI. All statistics were based on a two-sided t-test. ES, Effect Size.**

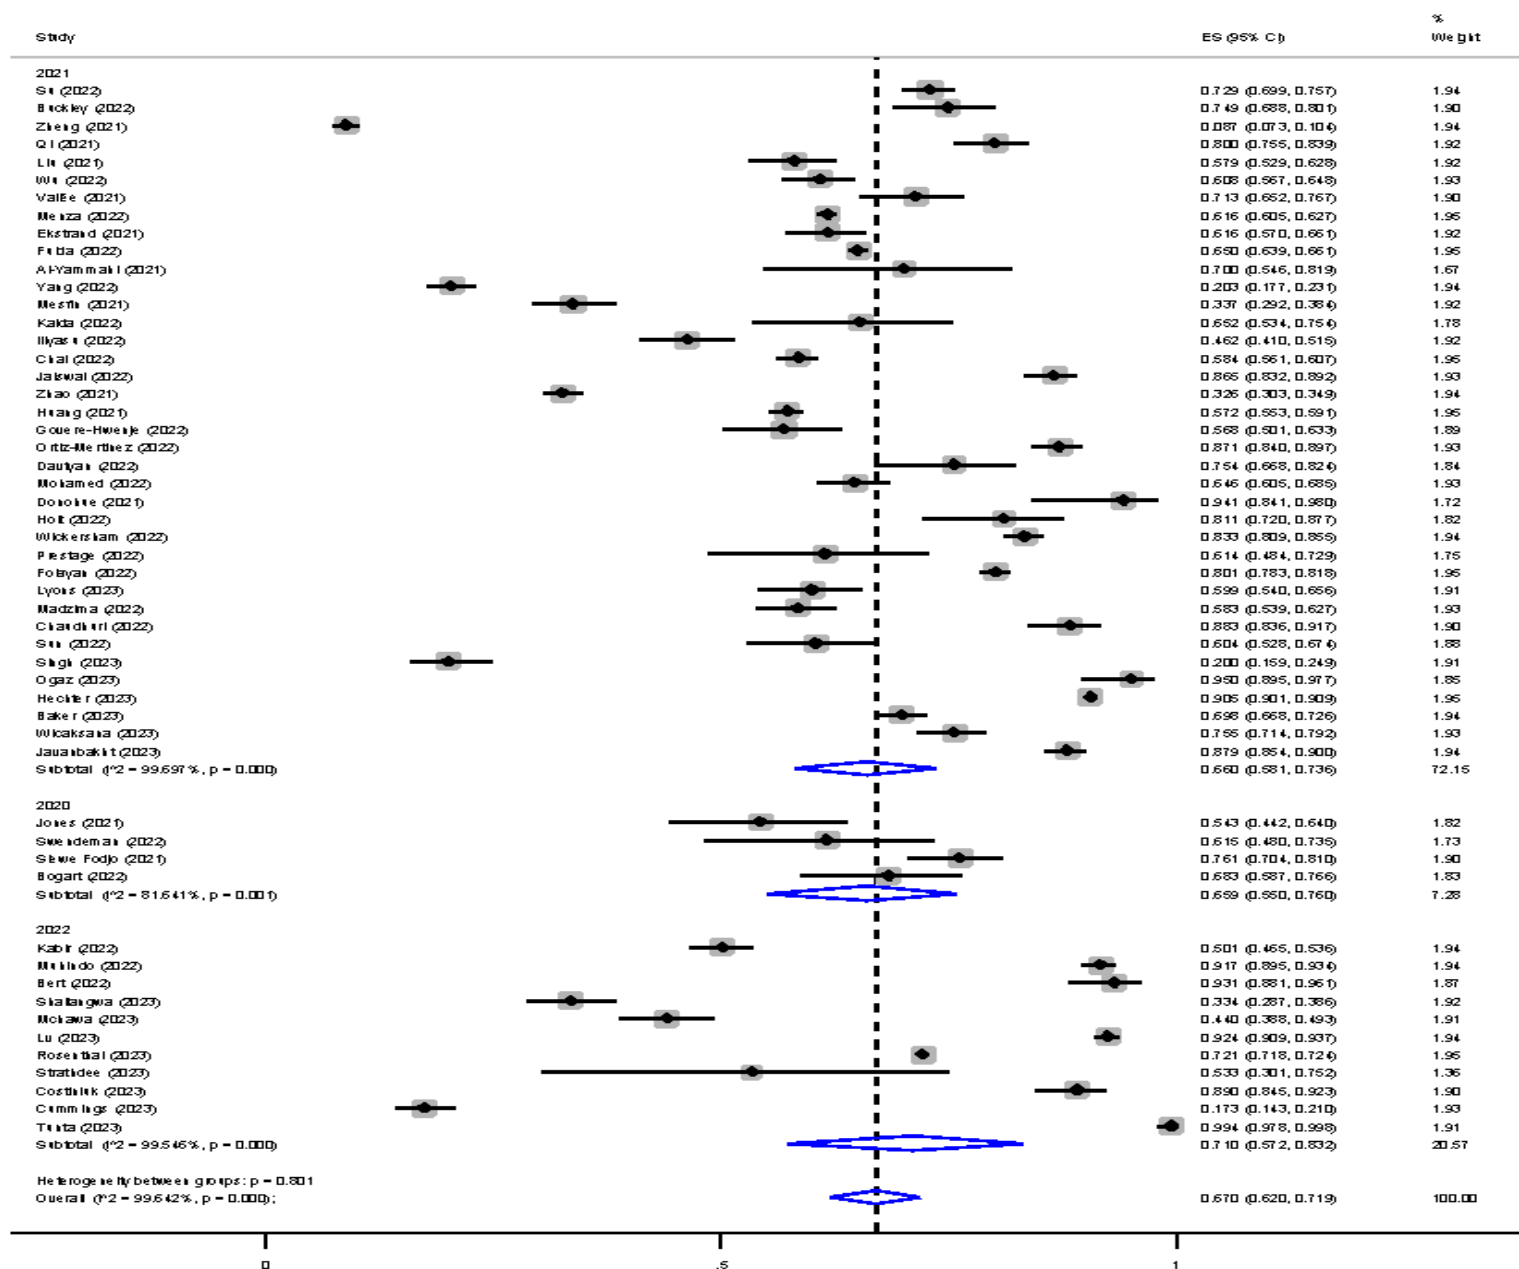

COVID-19 Vaccine Acceptance Among PLHIV (By Study Year)

**Supplementary Figure 5: Forest plots of the results of random-effects model meta-analysis of the prevalence (%) of COVID-19 vaccine acceptance according to the study (n = 53 studies, N = 166,455 participants) pooled using inverse variance weights. Each black-colored solid square represents the effect size of each characteristic, while the ends of the adjoining horizontal lines represent lower (left) and upper (right) confidence intervals. The blue-colored hollow diamond at the bottom denotes the overall estimated effect size and the 95% CI. All statistics were based on a two-sided t-test. ES, Effect Size.**

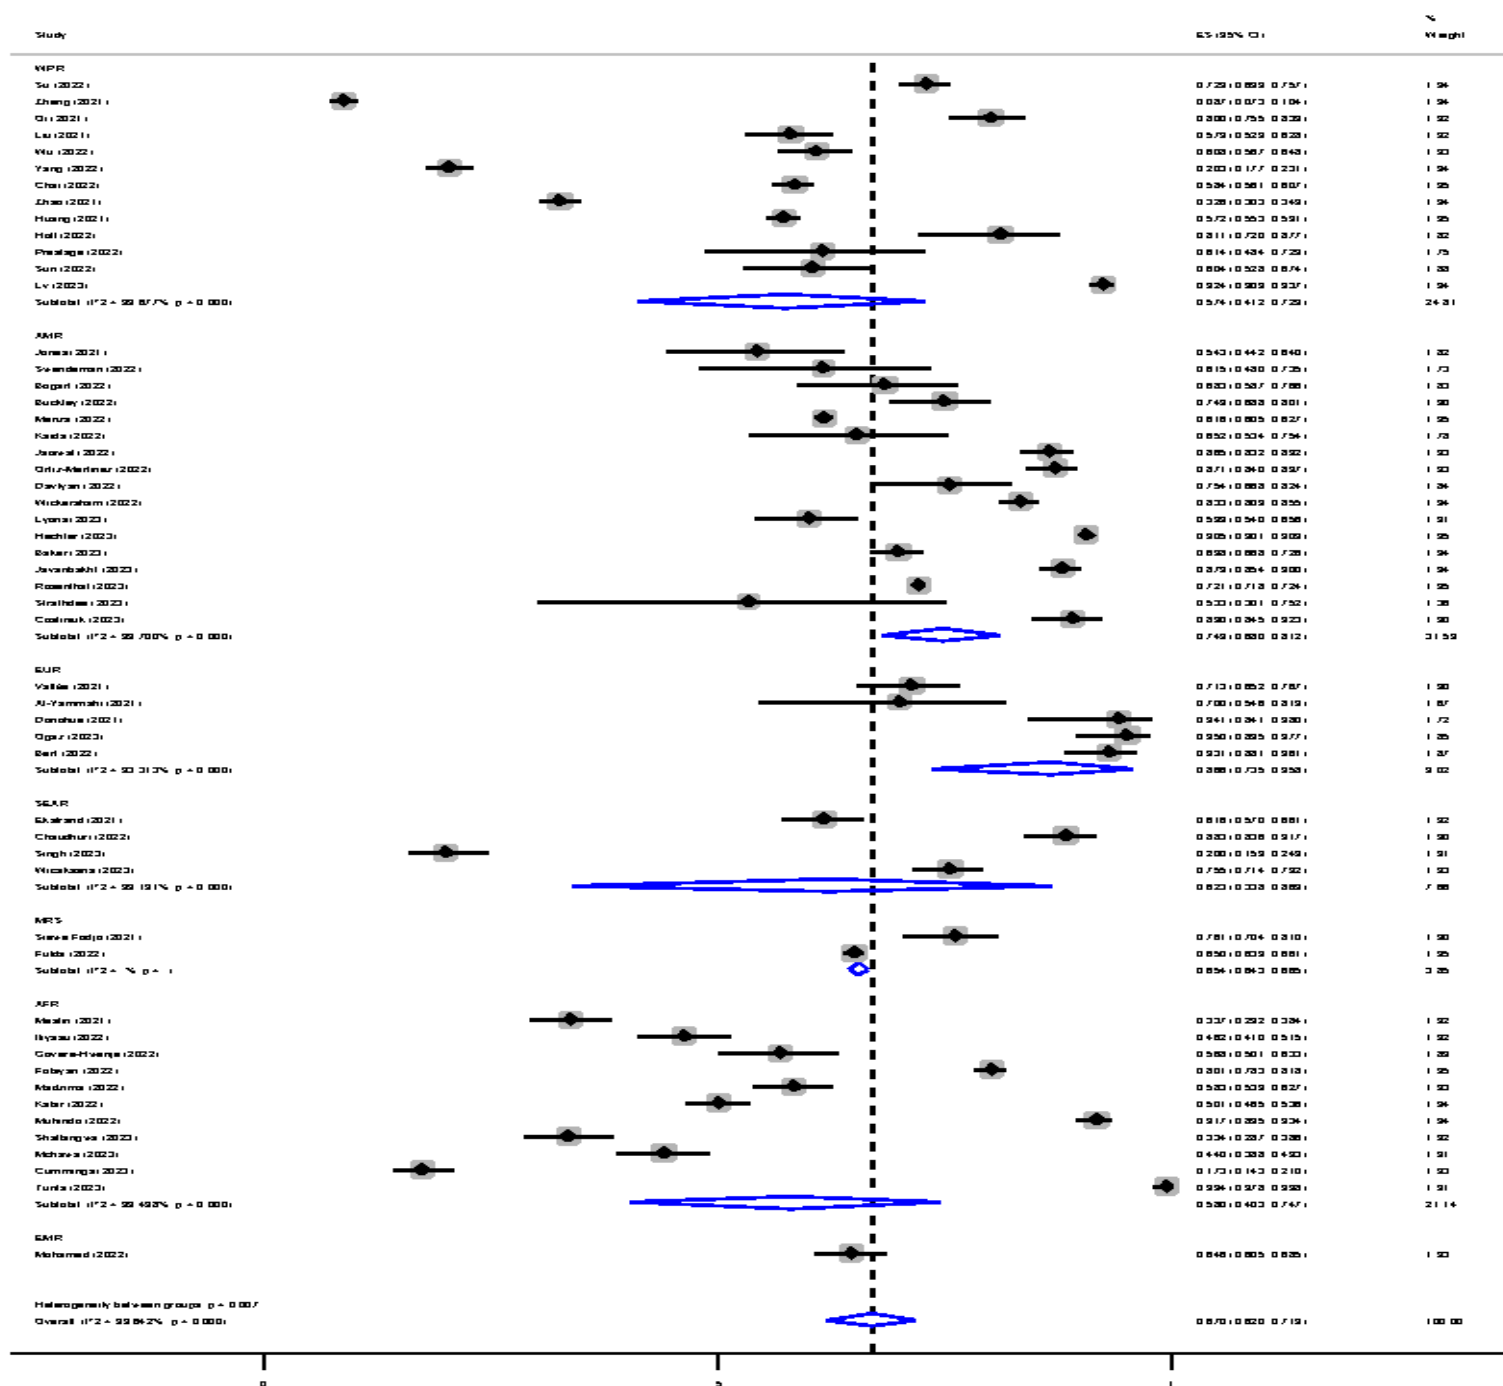

**Supplementary Figure 6: Forest plots of the results of random-effects model meta-analysis of the prevalence (%) of COVID-19 vaccine acceptance according to the WHO region (n = 53 studies, N = 166,455 participants) pooled using inverse variance weights. Each black-colored solid square represents the effect size of each characteristic, while the ends of the adjoining horizontal lines represent lower (left) and upper (right) confidence intervals. The blue-colored hollow diamond at the bottom denotes the overall estimated effect size and the 95% CI. All statistics were based on a two-sided t-test. ES, Effect Size.**

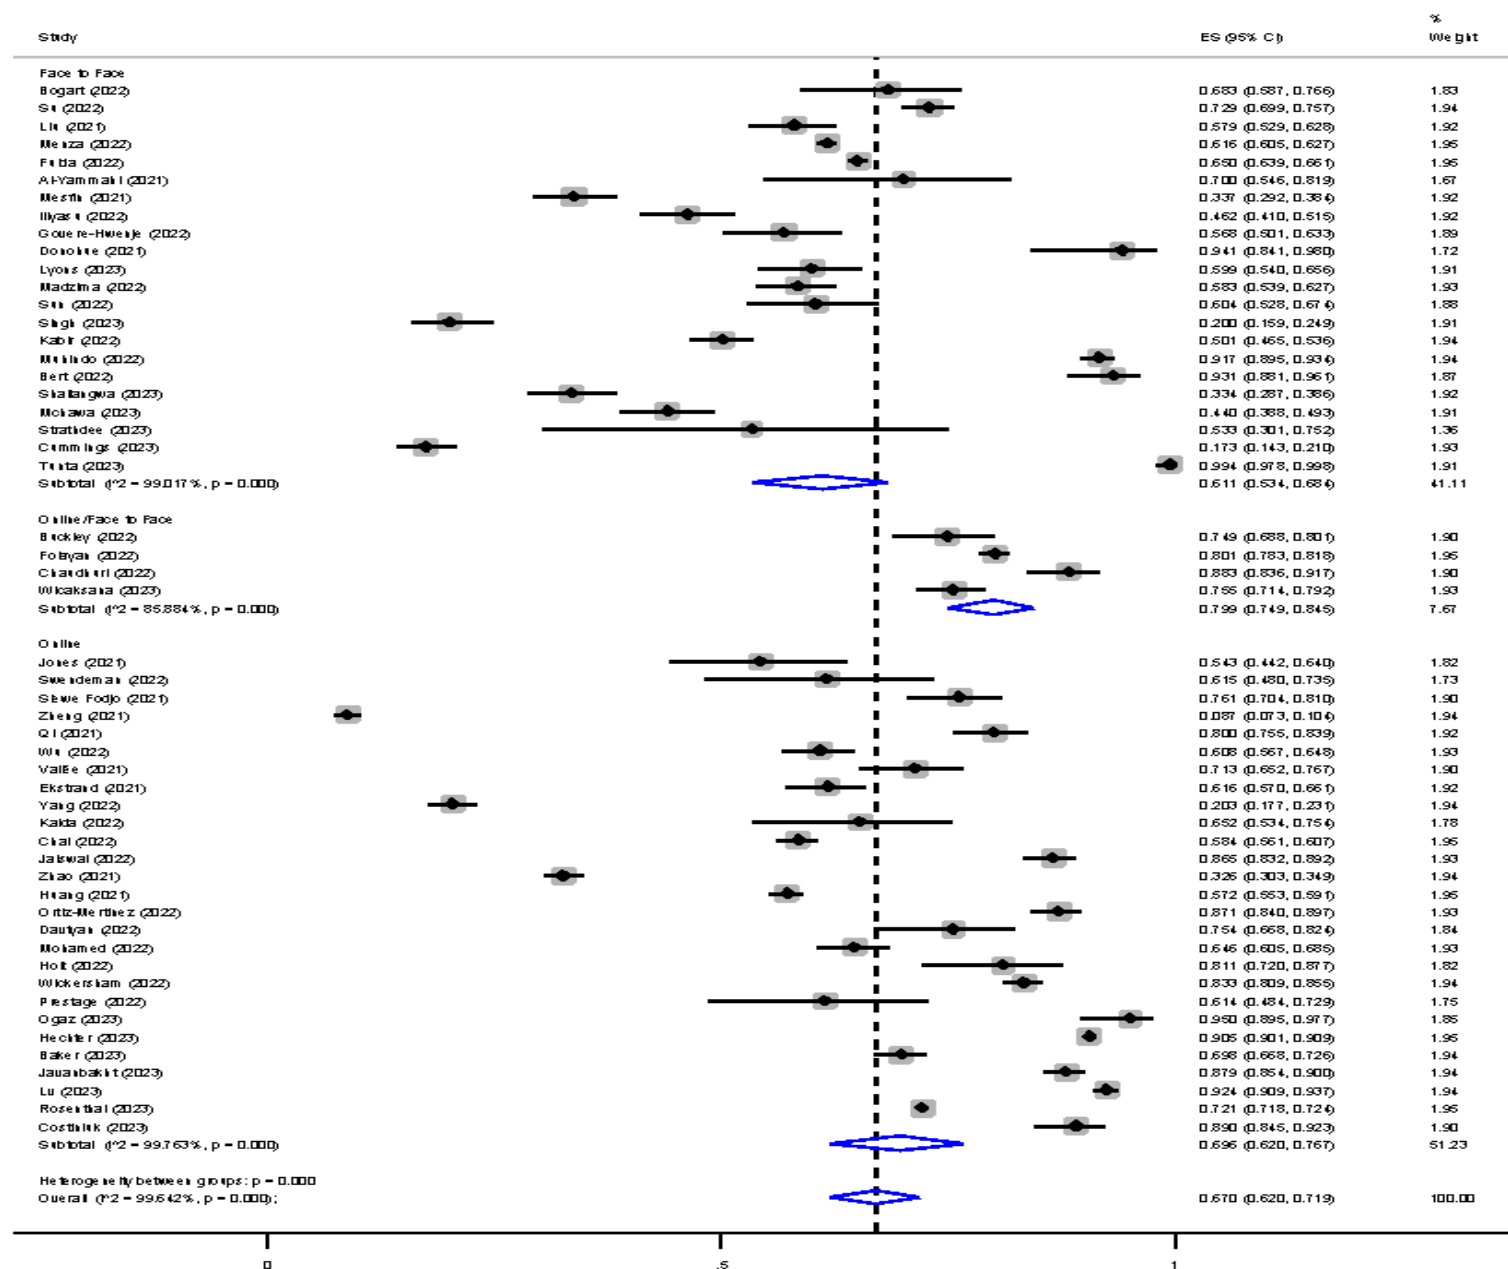

**Supplementary Figure 7: Forest plots of the results of random-effects model meta-analysis of the prevalence (%) of COVID-19 vaccine acceptance according to the data collection method employed (n = 53 studies, N = 166,455 participants) pooled using inverse variance weights. Each black-colored solid square represents the effect size of each characteristic, while the ends of the adjoining horizontal lines represent lower (left) and upper (right) confidence intervals. The blue-colored hollow diamond at the bottom denotes the overall estimated effect size and the 95% CI. All statistics were based on a two-sided t-test. ES, Effect Size.**

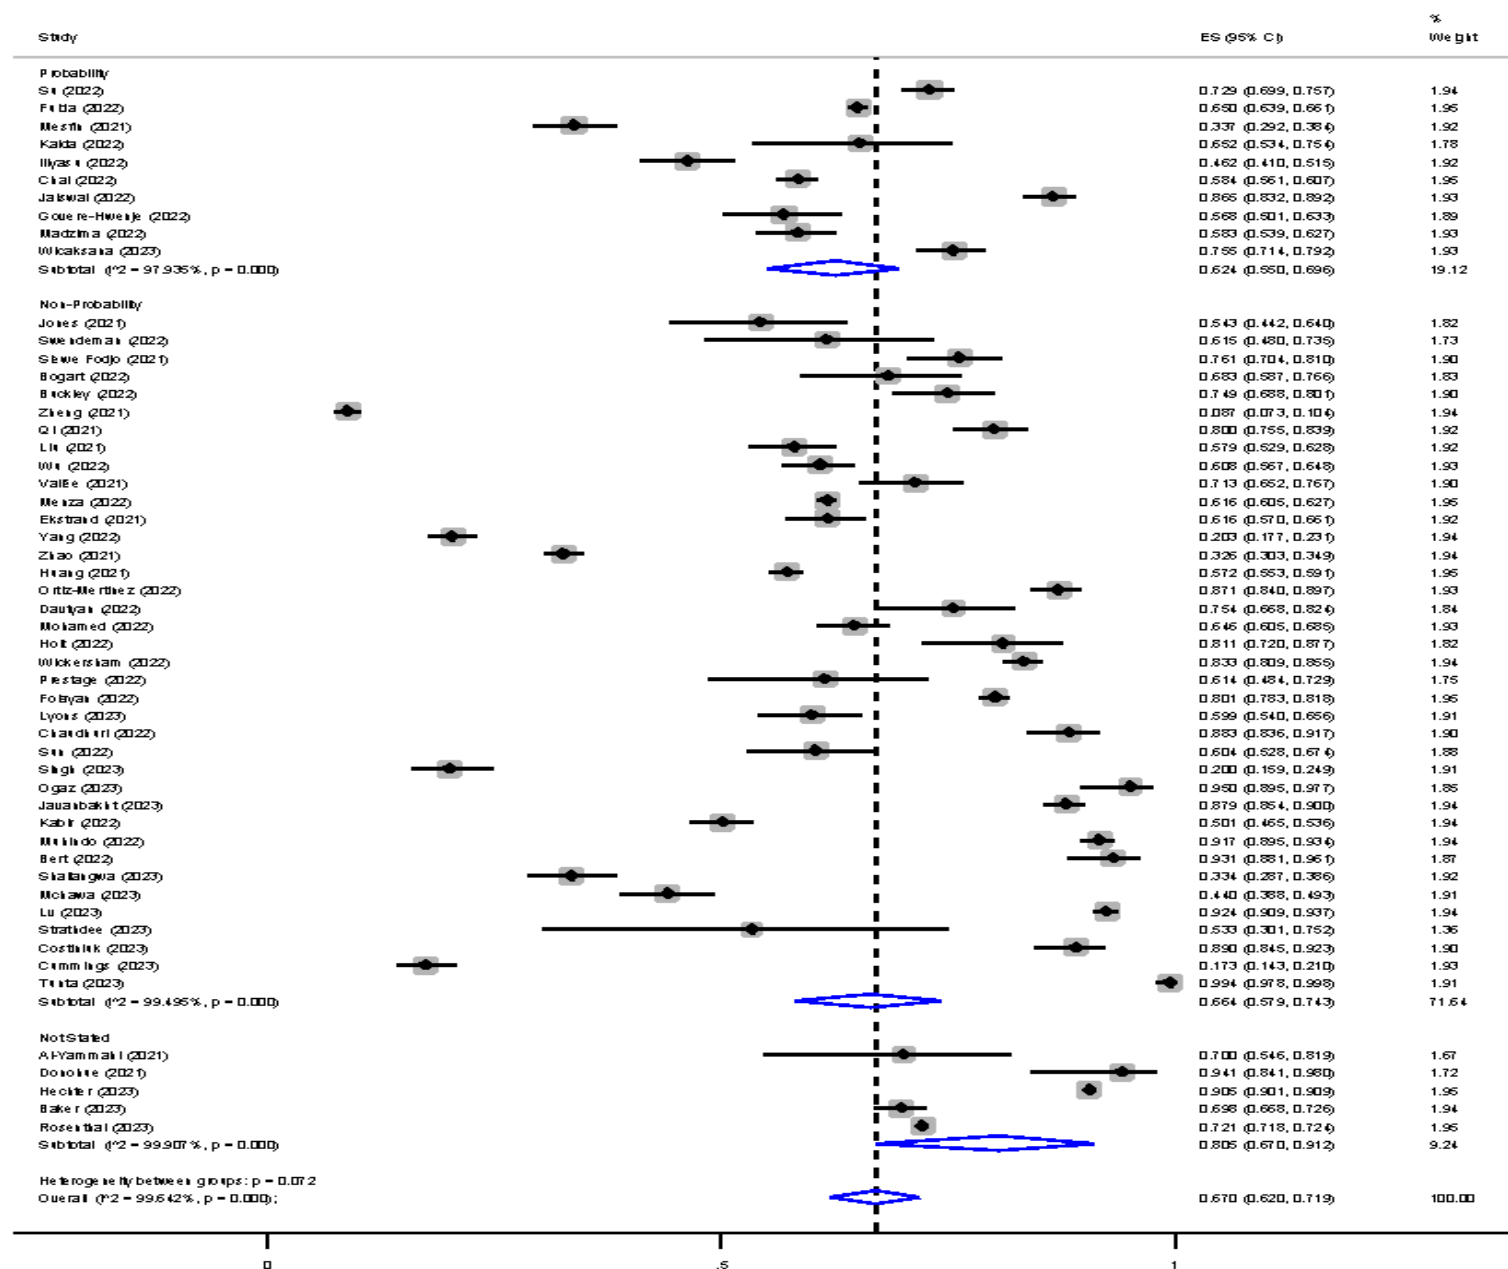

**Supplementary Figure 8: Forest plots of the results of random-effects model meta-analysis of the prevalence (%) of COVID-19 vaccine acceptance according to the sampling method employed (n = 53 studies, N = 166,455 participants) pooled using inverse variance weights. Each black-colored solid square represents the effect size of each characteristic, while the ends of the adjoining horizontal lines represent lower (left) and upper (right) confidence intervals. The blue-colored hollow diamond at the bottom denotes the overall estimated effect size and the 95% CI. All statistics were based on a two-sided t-test. ES, Effect Size.**

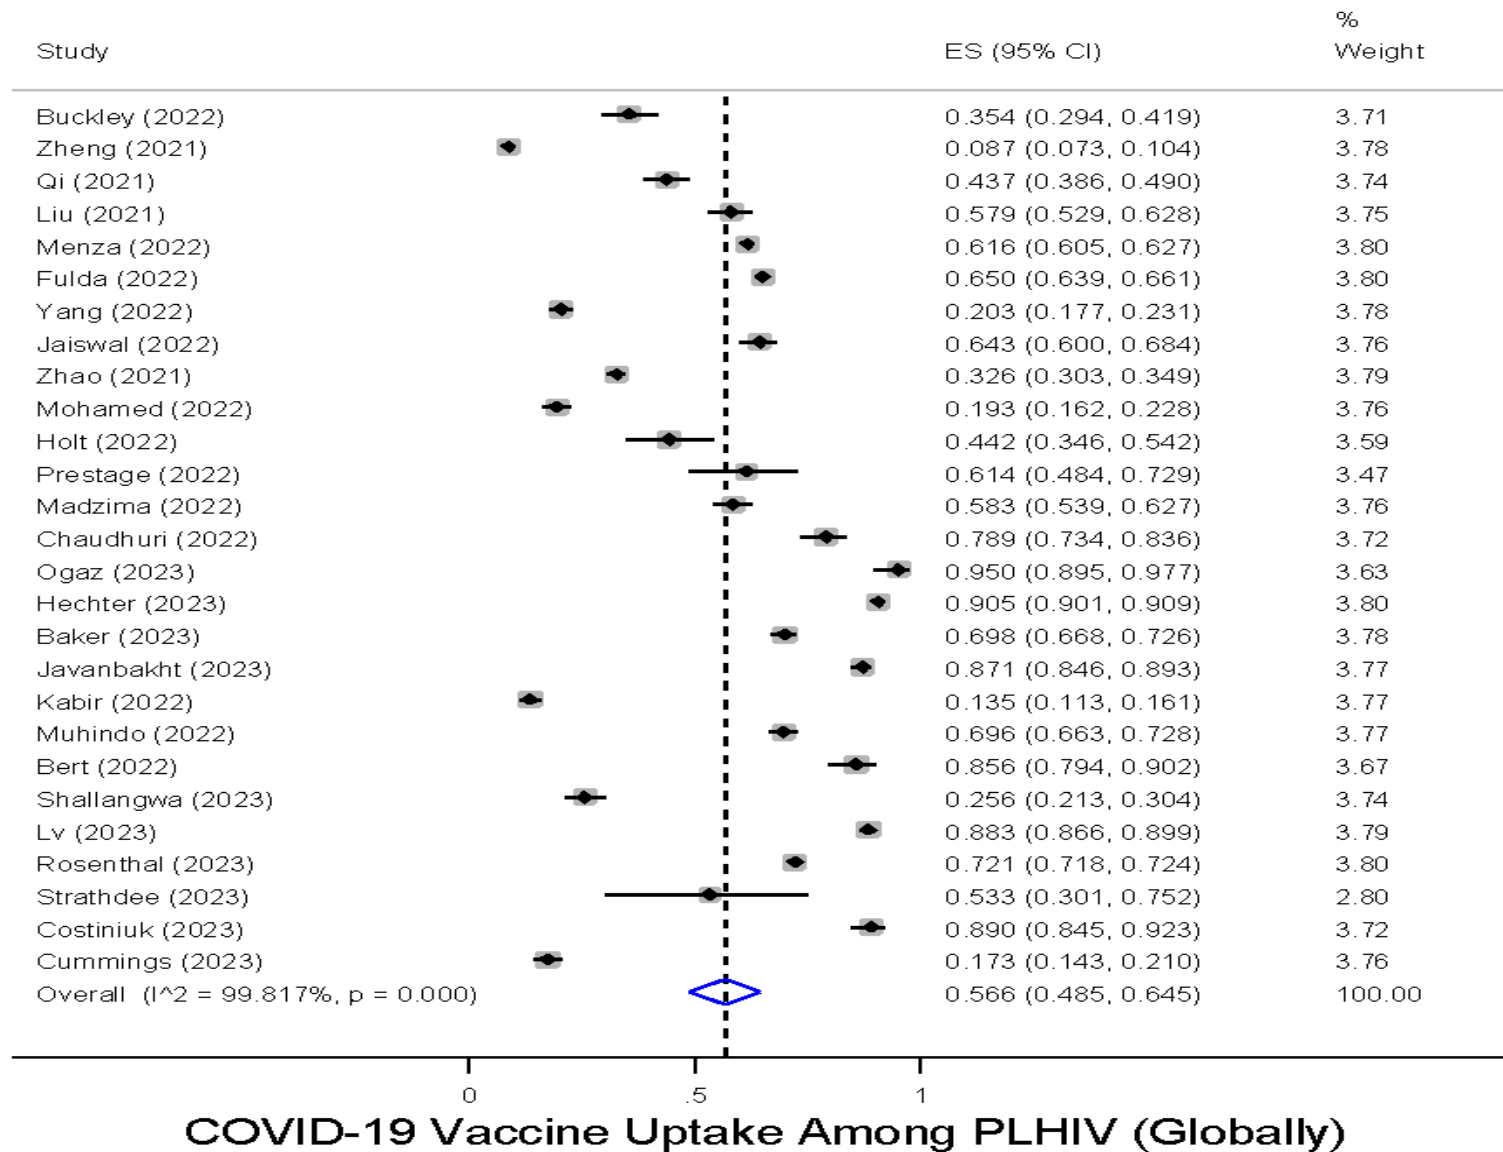

**Supplementary Figure 9: Forest plots of the results of random-effects model meta-analysis of the prevalence (%) of COVID-19 vaccine uptake among PLHIV globally (n = 27 studies, N = 150,926 participants) pooled using inverse variance weights. Each black-colored solid square represents the effect size of each characteristic, while the ends of the adjoining horizontal lines represent lower (left) and upper (right) confidence intervals. The blue-colored hollow diamond at the bottom denotes the overall estimated effect size and the 95% CI. All statistics were based on a two-sided t-test. ES, Effect Size.**

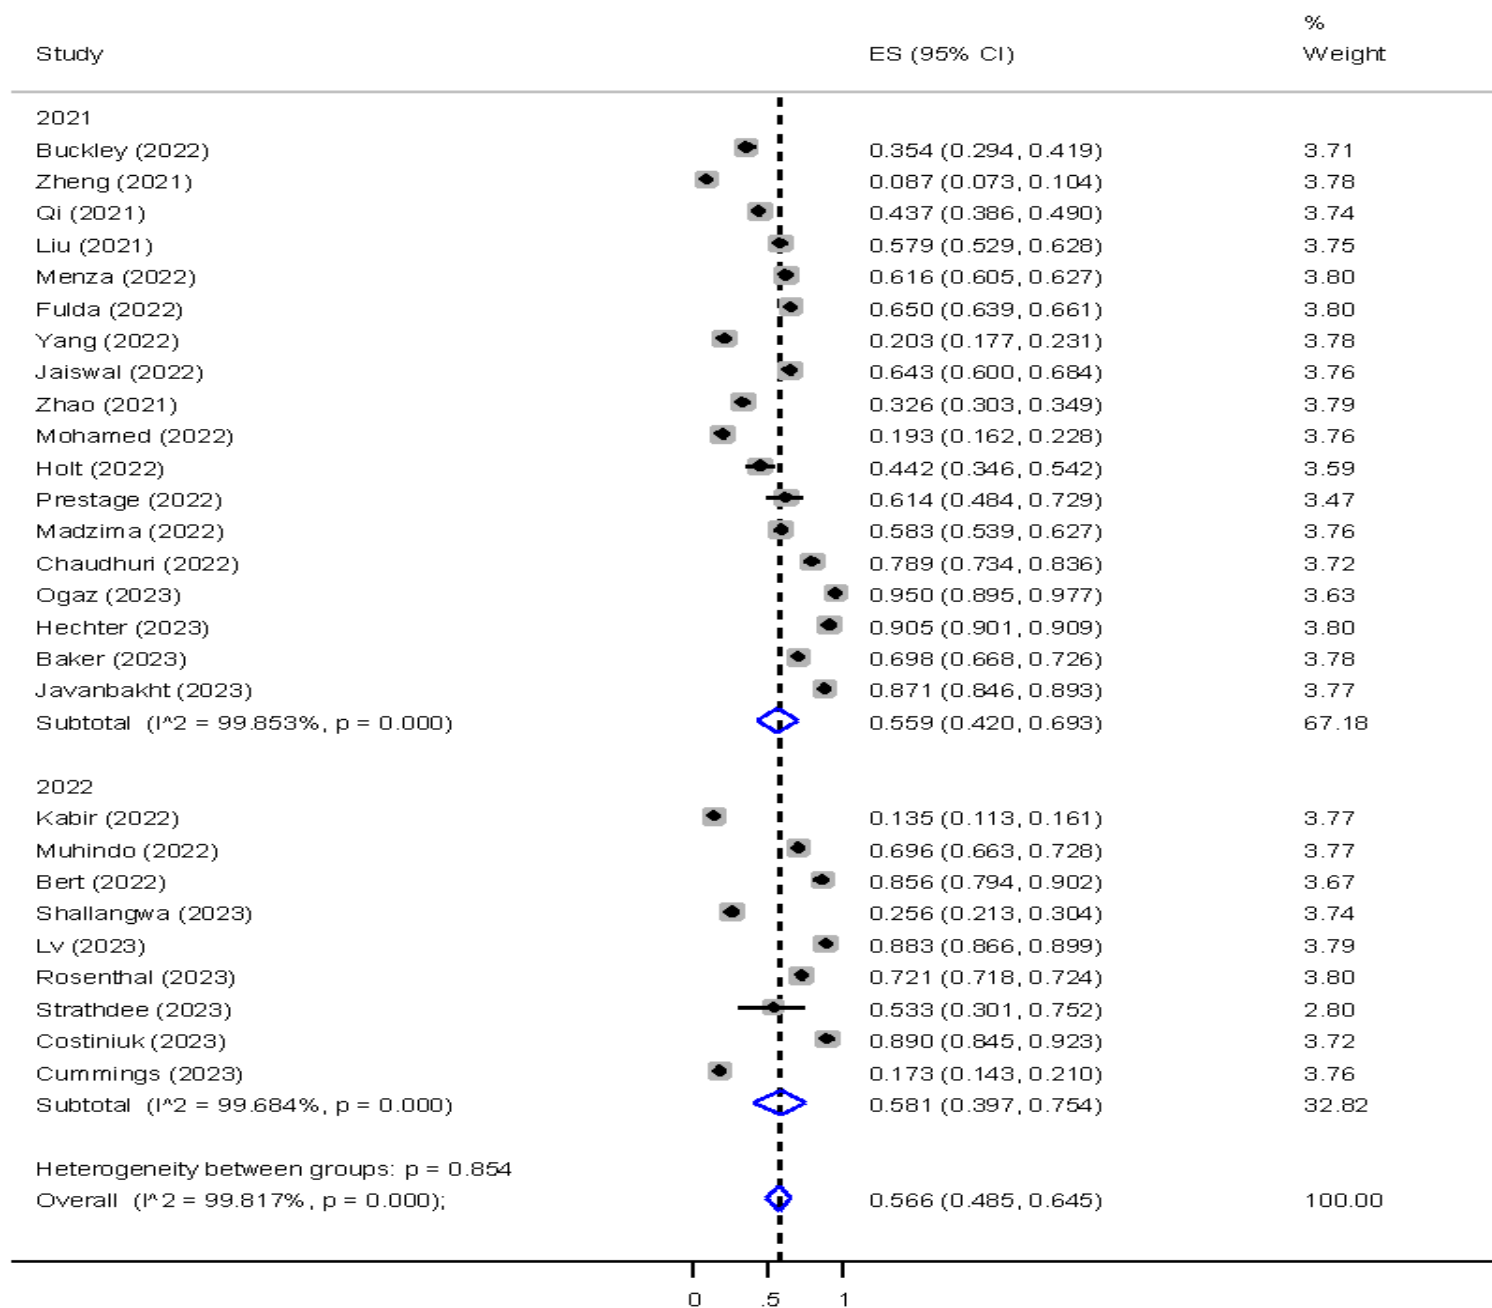

**Supplementary Figure 10: Forest plots of the results of random-effects model meta-analysis of the prevalence (%) of COVID-19 vaccine uptake among PLHIV according to the study year (n = 27 studies, N = 150,926 participants) pooled using inverse variance weights. Each black-colored solid square represents the effect size of each characteristic, while the ends of the adjoining horizontal lines represent lower (left) and upper (right) confidence intervals. The blue-colored hollow diamond at the bottom denotes the overall estimated effect size and the 95% CI. All statistics were based on a two-sided t-test. ES, Effect Size.**

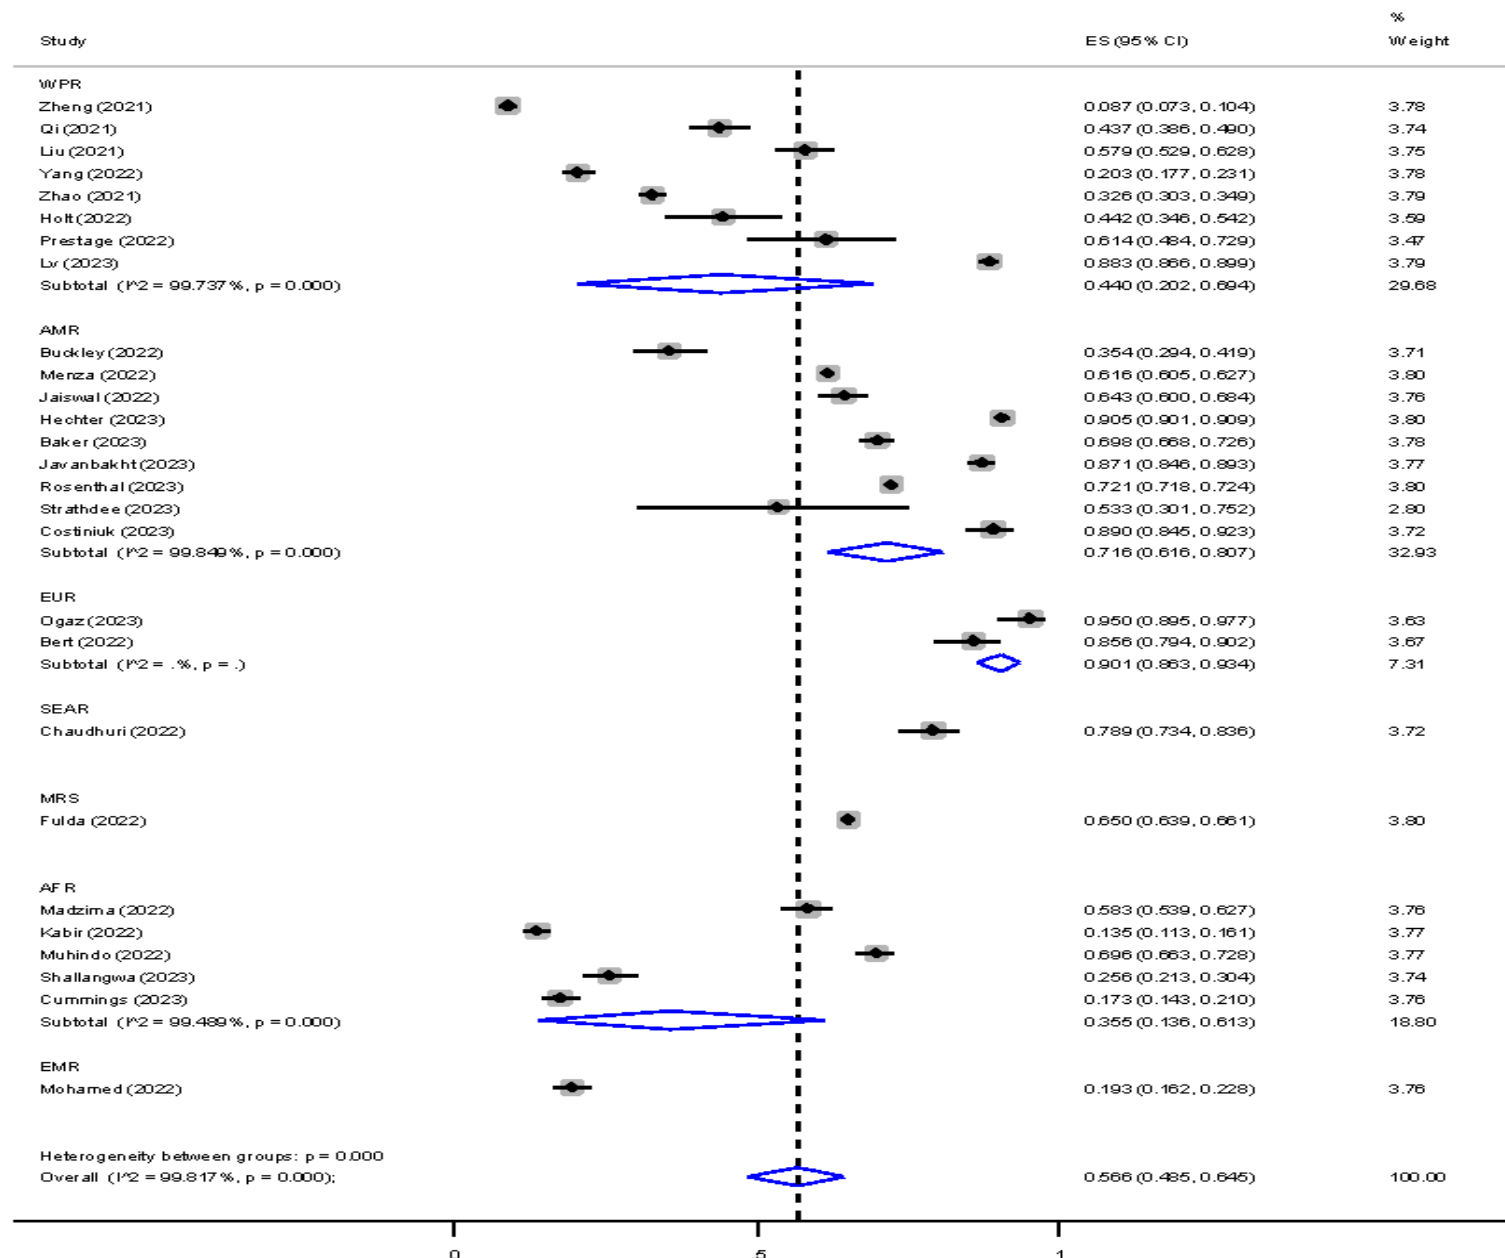

COVID-19 Vaccine uptake Among PLHIV (By WHO Region)

**Supplementary Figure 11: Forest plots of the results of random-effects model meta-analysis of the prevalence (%) of COVID-19 vaccine uptake among PLHIV according to the WHO region (n = 27 studies, N = 150,926 participants) pooled using inverse variance weights. Each black-colored solid square represents the effect size of each characteristic, while the ends of the adjoining horizontal lines represent lower (left) and upper (right) confidence intervals. The blue-colored hollow diamond at the bottom denotes the overall estimated effect size and the 95% CI. All statistics were based on a two-sided t-test. ES, Effect Size.**

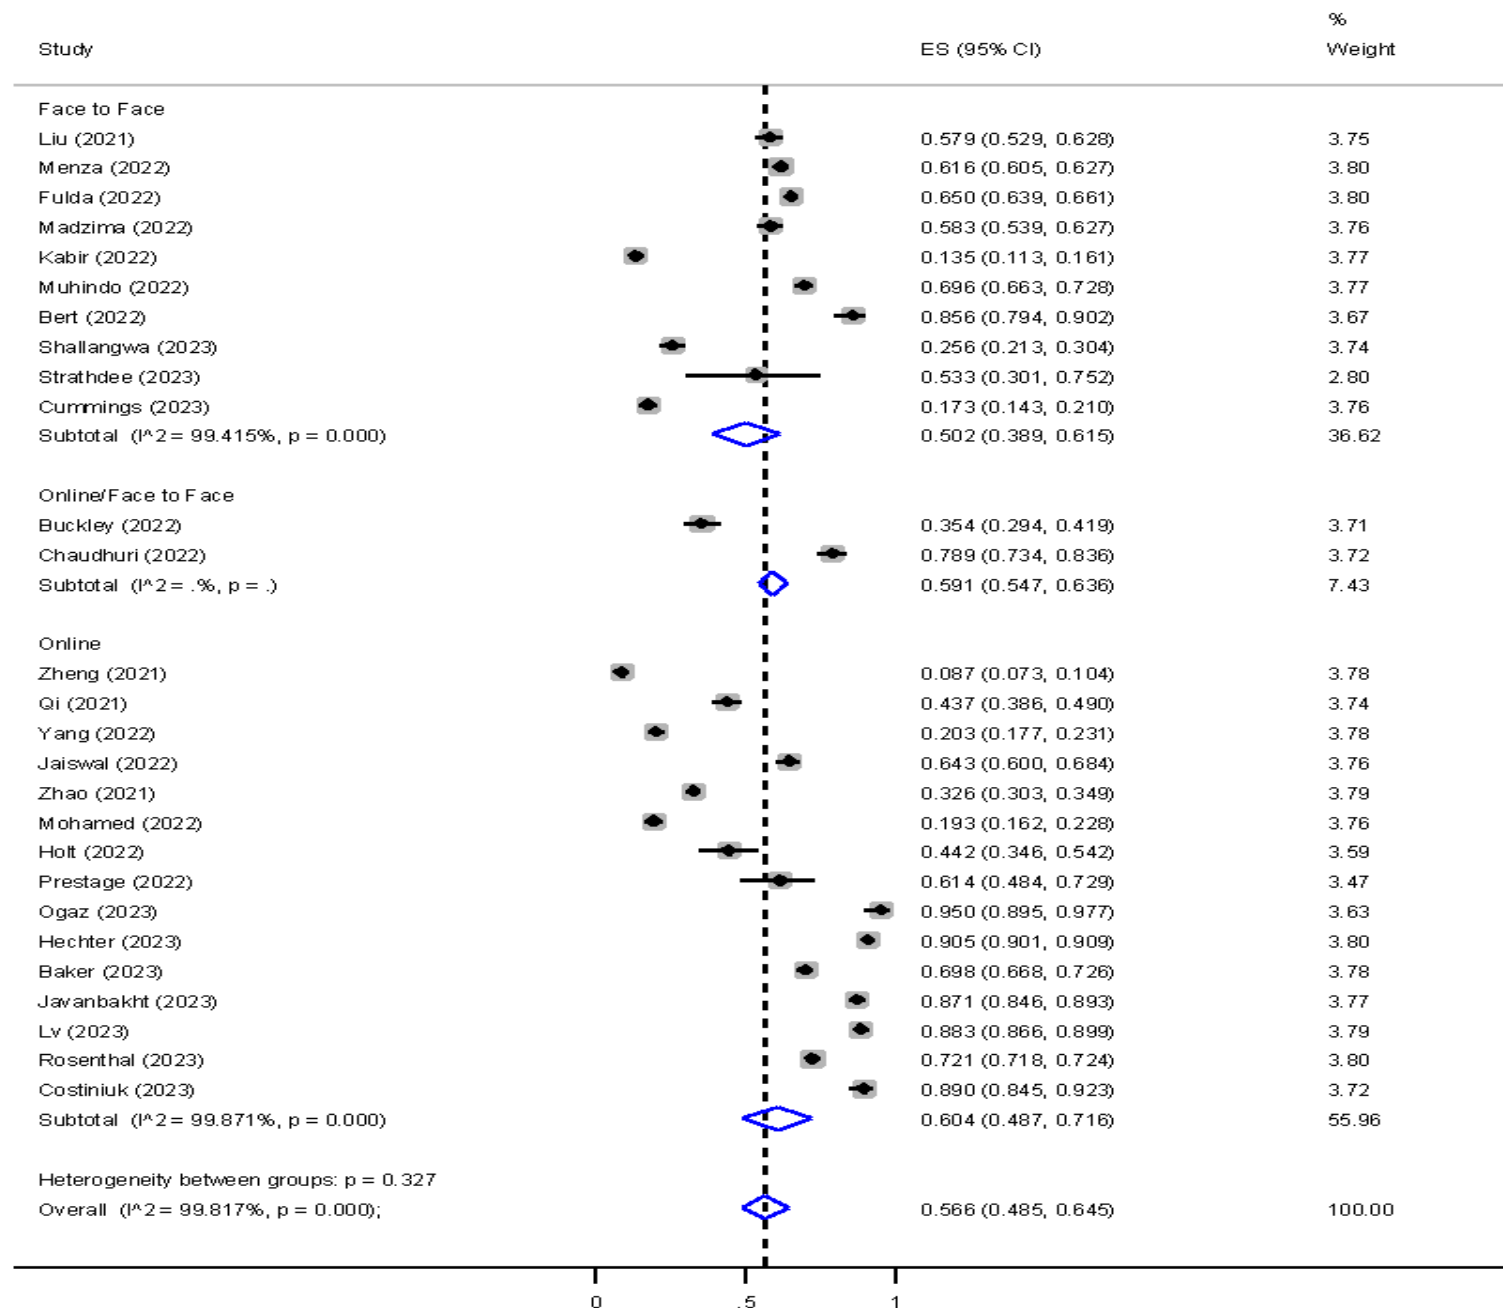

**Supplementary Figure 12: Forest plots of the results of random-effects model meta-analysis of the prevalence (%) of COVID-19 vaccine uptake among PLHIV according to the data collection method (n = 27 studies, N = 150,926 participants) pooled using inverse variance weights. Each black-colored solid square represents the effect size of each characteristic, while the ends of the adjoining horizontal lines represent lower (left) and upper (right) confidence intervals. The blue-colored hollow diamond at the bottom denotes the overall estimated effect size and the 95% CI. All statistics were based on a two-sided t-test. ES, Effect Size.**

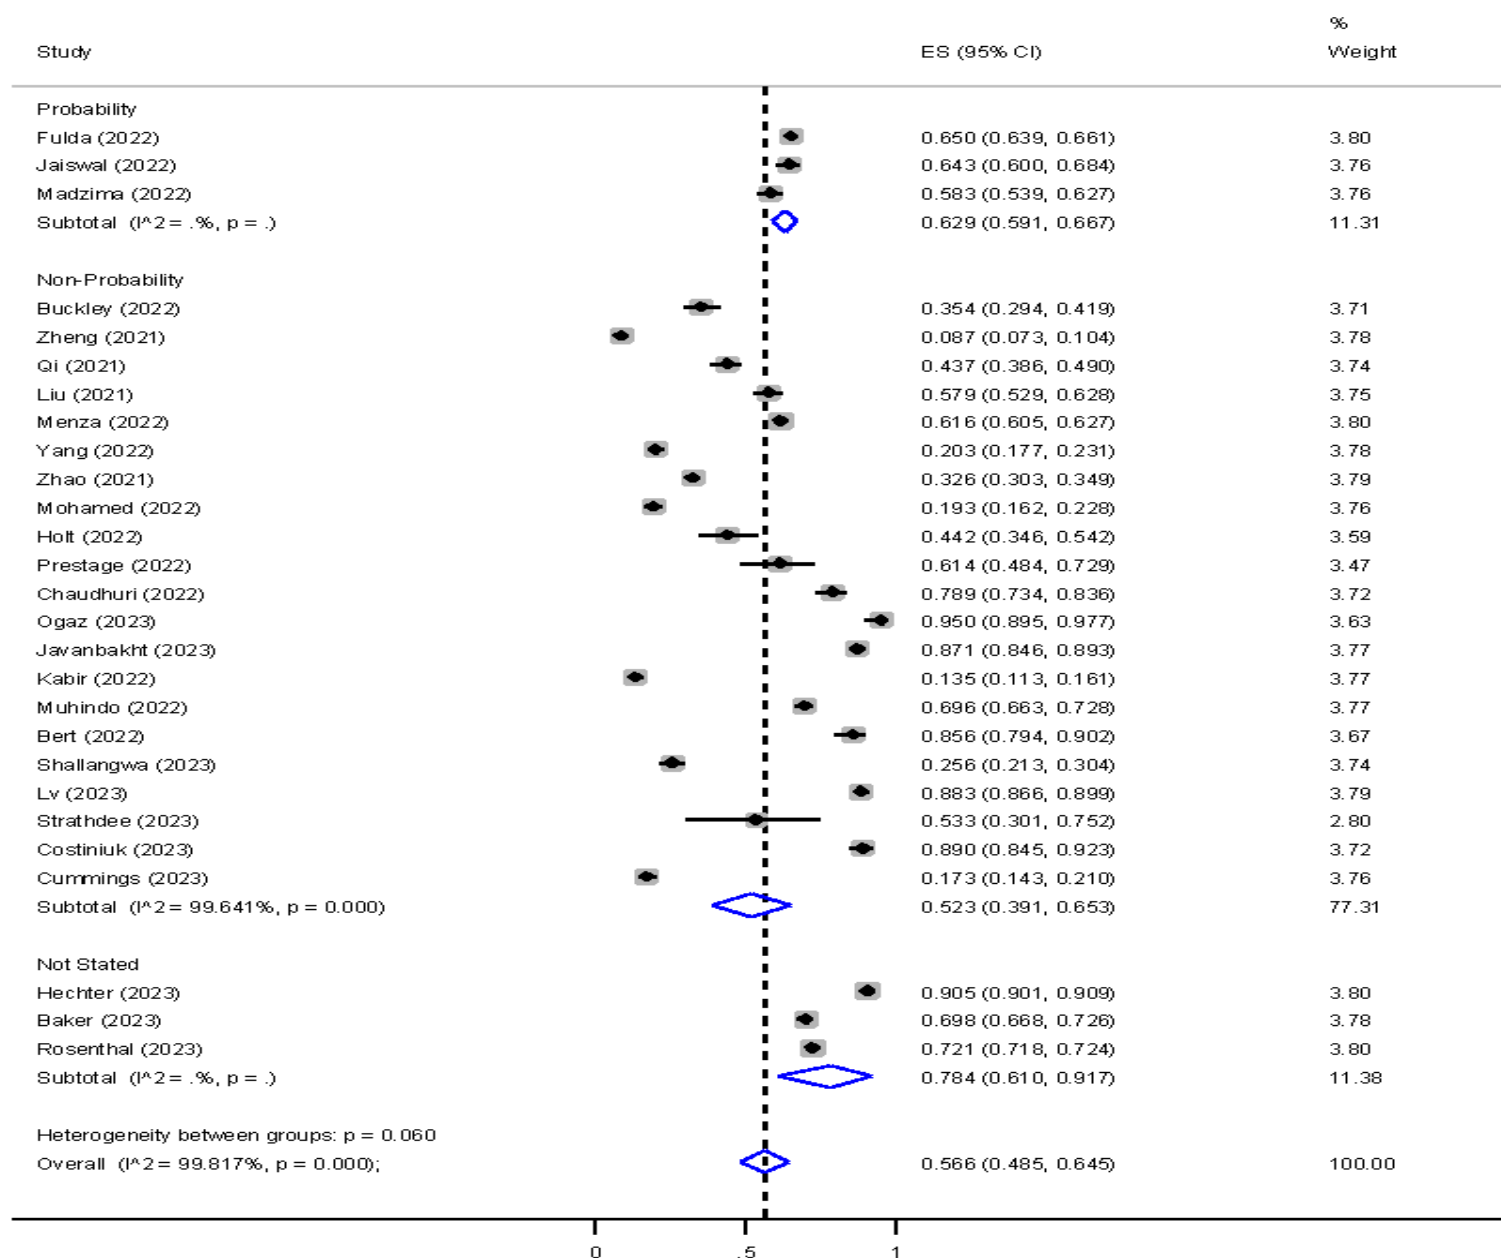

COVID-19 Vaccine Uptake Among PLHIV (By Sampling Method)

**Supplementary Figure 13: Forest plots of the results of random-effects model meta-analysis of the prevalence (%) of COVID-19 vaccine uptake among PLHIV according to the sampling method employed (n = 27 studies, N = 150,926 participants) pooled using inverse variance weights. Each black-colored solid square represents the effect size of each characteristic, while the ends of the adjoining horizontal lines represent lower (left) and upper (right) confidence intervals. The blue-colored hollow diamond at the bottom denotes the overall estimated effect size and the 95% CI. All statistics were based on a two-sided t-test. ES, Effect Size.**

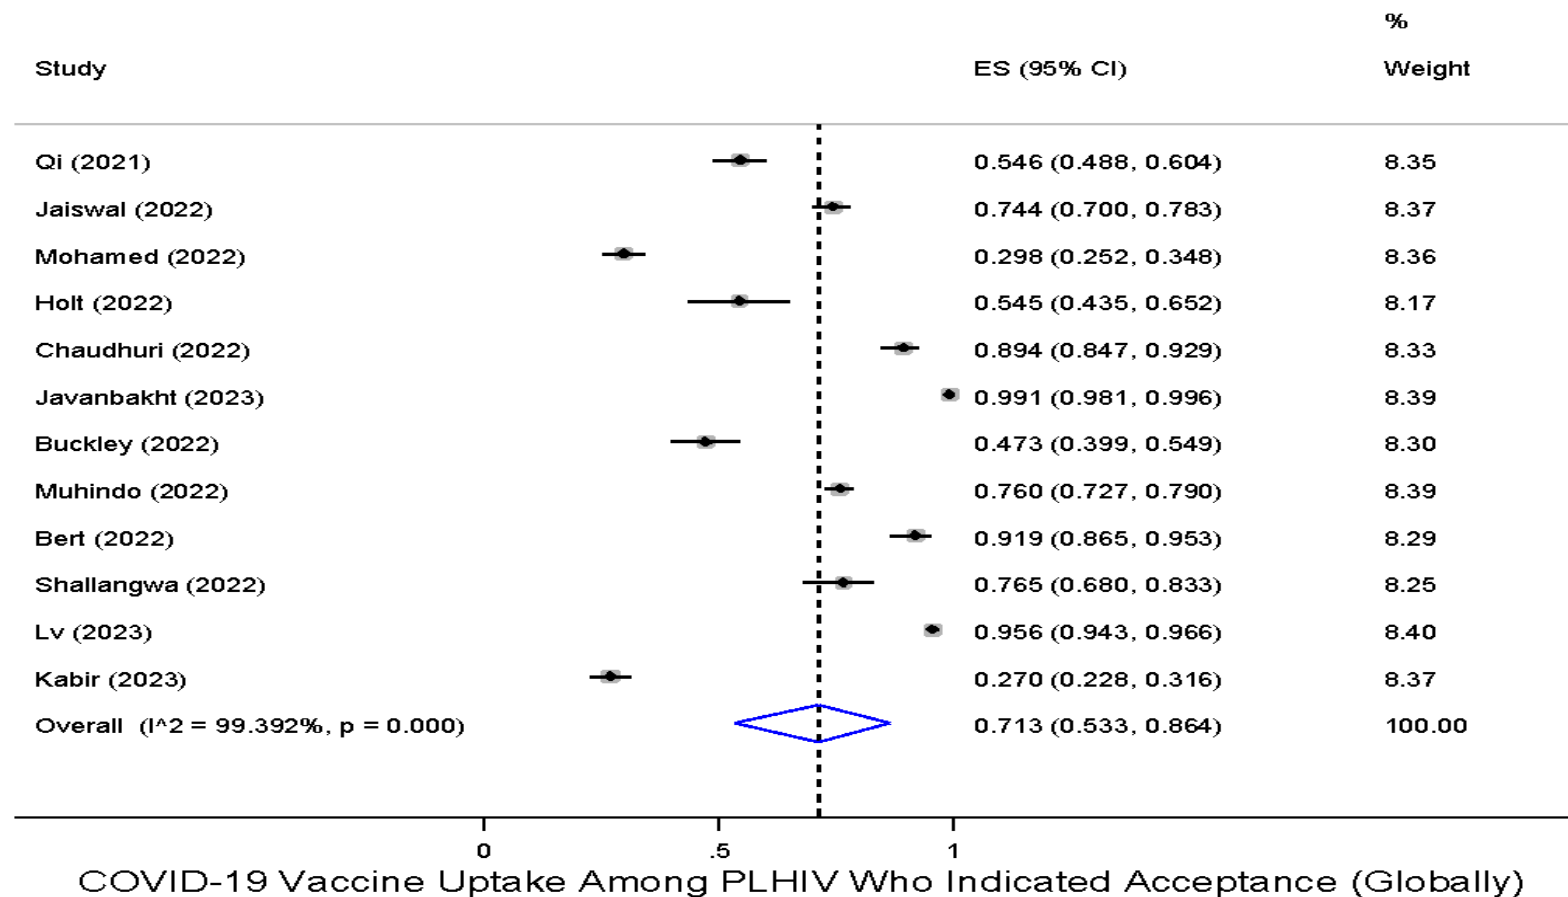

**Supplementary Figure 14: Forest plots of the results of random-effects model meta-analysis of the prevalence (%) of COVID-19 vaccine uptake among PLHIV who indicated acceptance globally (n = 13 studies, N = 6,186 participants) pooled using inverse variance weights. Each black-colored solid square represents the effect size of each characteristic, while the ends of the adjoining horizontal lines represent lower (left) and upper (right) confidence intervals. The blue-colored hollow diamond at the bottom denotes the overall estimated effect size and the 95% CI. All statistics were based on a two-sided t-test. ES, Effect Size.**



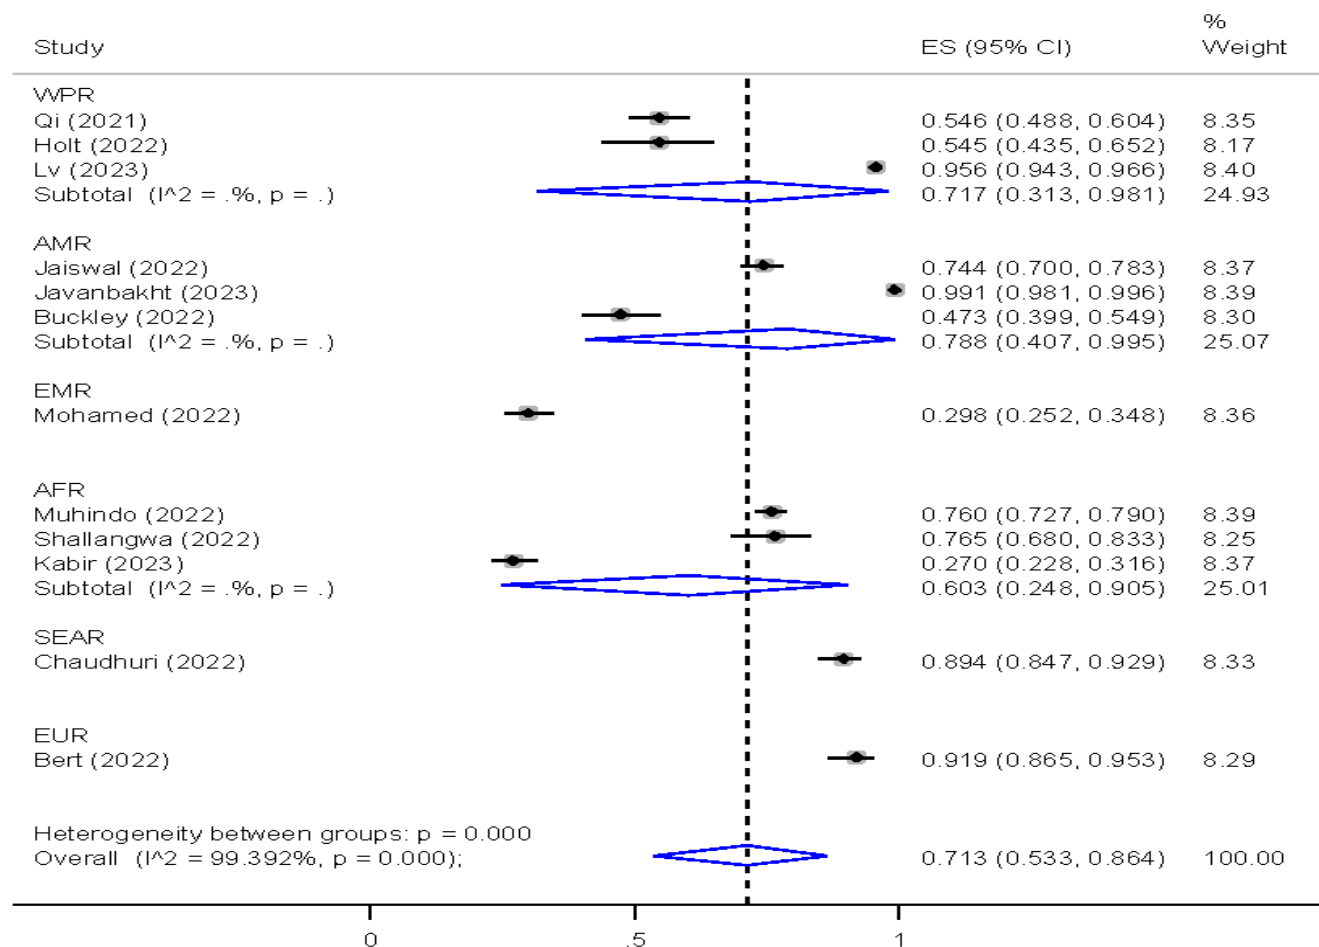

COVID-19 Vaccine uptake Among PLHIV Who Indicated Acceptance (By WHO Region)

**Supplementary Figure 15: Forest plots of the results of random-effects model meta-analysis of the prevalence (%) of COVID-19 vaccine uptake among PLHIV who indicated acceptance according to the WHO region (n = 13 studies, N = 6,186 participants) pooled using inverse variance weights. Each black-colored solid square represents the effect size of each**

characteristic, while the ends of the adjoining horizontal lines represent lower (left) and upper (right) confidence intervals. The blue-colored hollow diamond at the bottom denotes the overall estimated effect size and the 95% CI. All statistics were based on a two-sided t-test. ES, Effect Size.

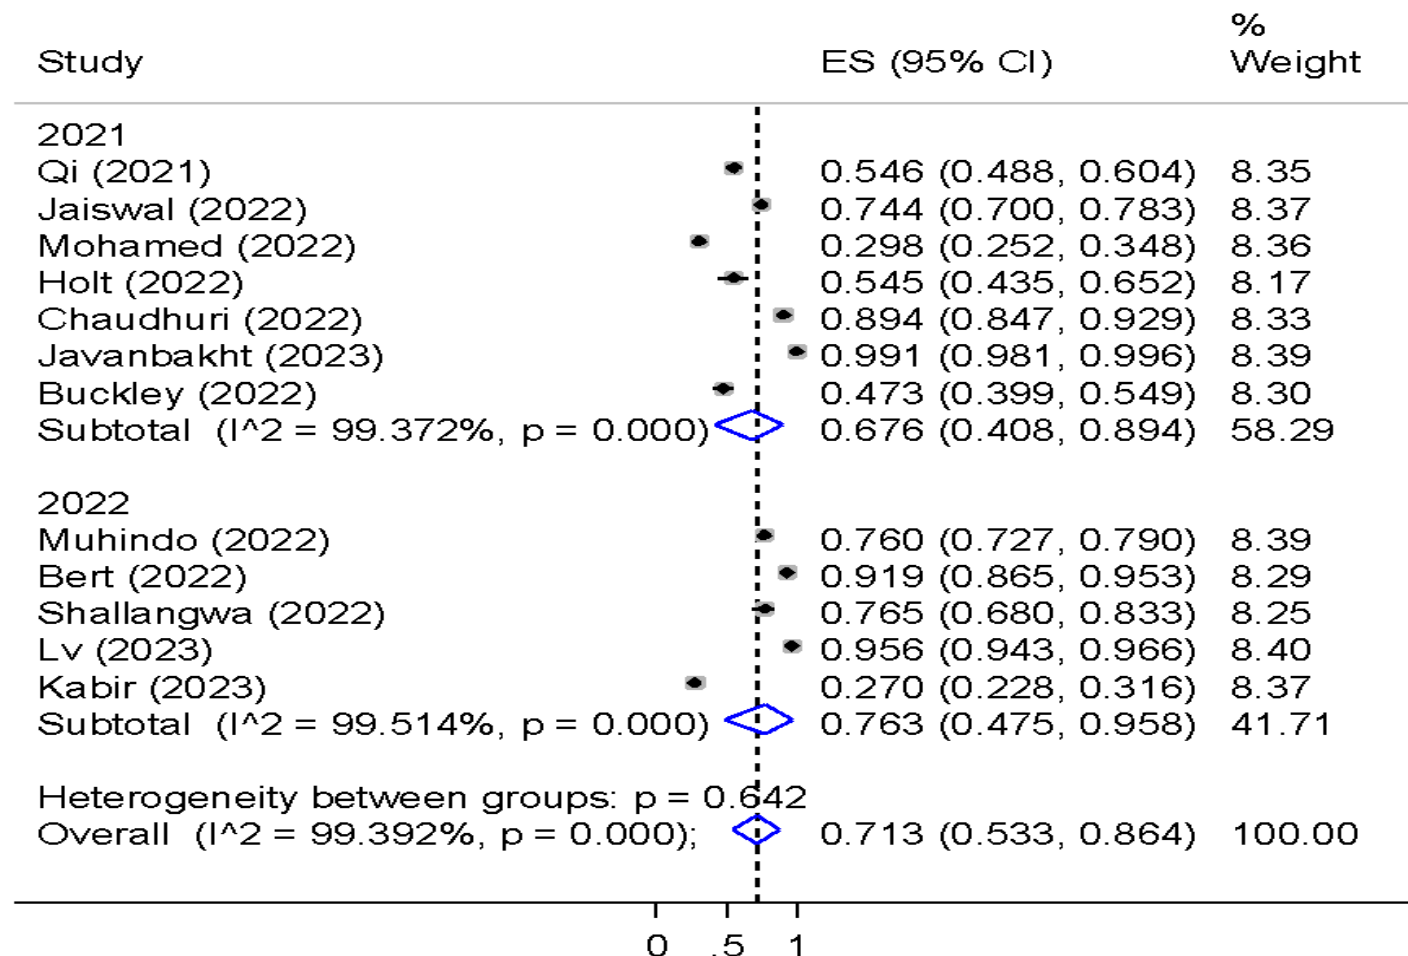

COVID-19 Vaccine Uptake Among PLHIV Who Indicated Acceptance (By Study Year)

**Supplementary Figure 16: Forest plots of the results of random-effects model meta-analysis of the prevalence (%) of COVID-19 vaccine uptake among PLHIV who indicated acceptance according to the study year (n = 13 studies, N = 6,186 participants) pooled using inverse variance weights. Each black-colored solid square represents the effect size of each characteristic, while**

**the ends of the adjoining horizontal lines represent lower (left) and upper (right) confidence intervals. The blue-colored hollow diamond at the bottom denotes the overall estimated effect size and the 95% CI. All statistics were based on a two-sided t-test. ES, Effect Size.**

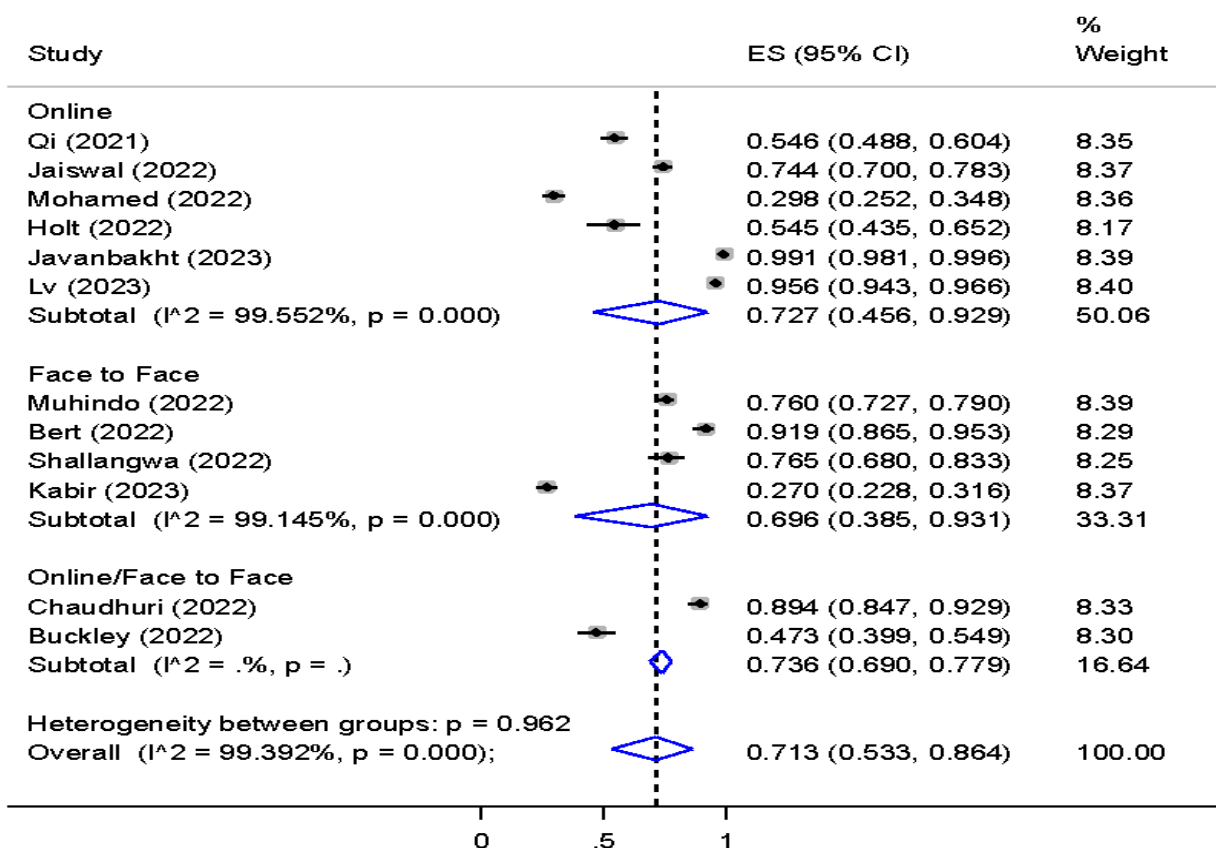

Figure 17: Vaccine uptake Among PLHIV Who Indicated Acceptance (By Data Collection Method)

**Supplementary Figure 17: Forest plots of the results of random-effects model meta-analysis of the prevalence (%) of COVID-19 vaccine uptake among PLHIV who indicated acceptance according to the data collection method employed (n = 13 studies, N = 6,186 participants) pooled using inverse variance weights. Each black-colored solid square represents the effect size of each characteristic, while the ends of the adjoining horizontal lines represent lower (left) and upper (right) confidence intervals. The blue-colored hollow diamond at the bottom denotes the overall estimated effect size and the 95% CI. All statistics were based on a two-sided t-test. ES, Effect Size.**

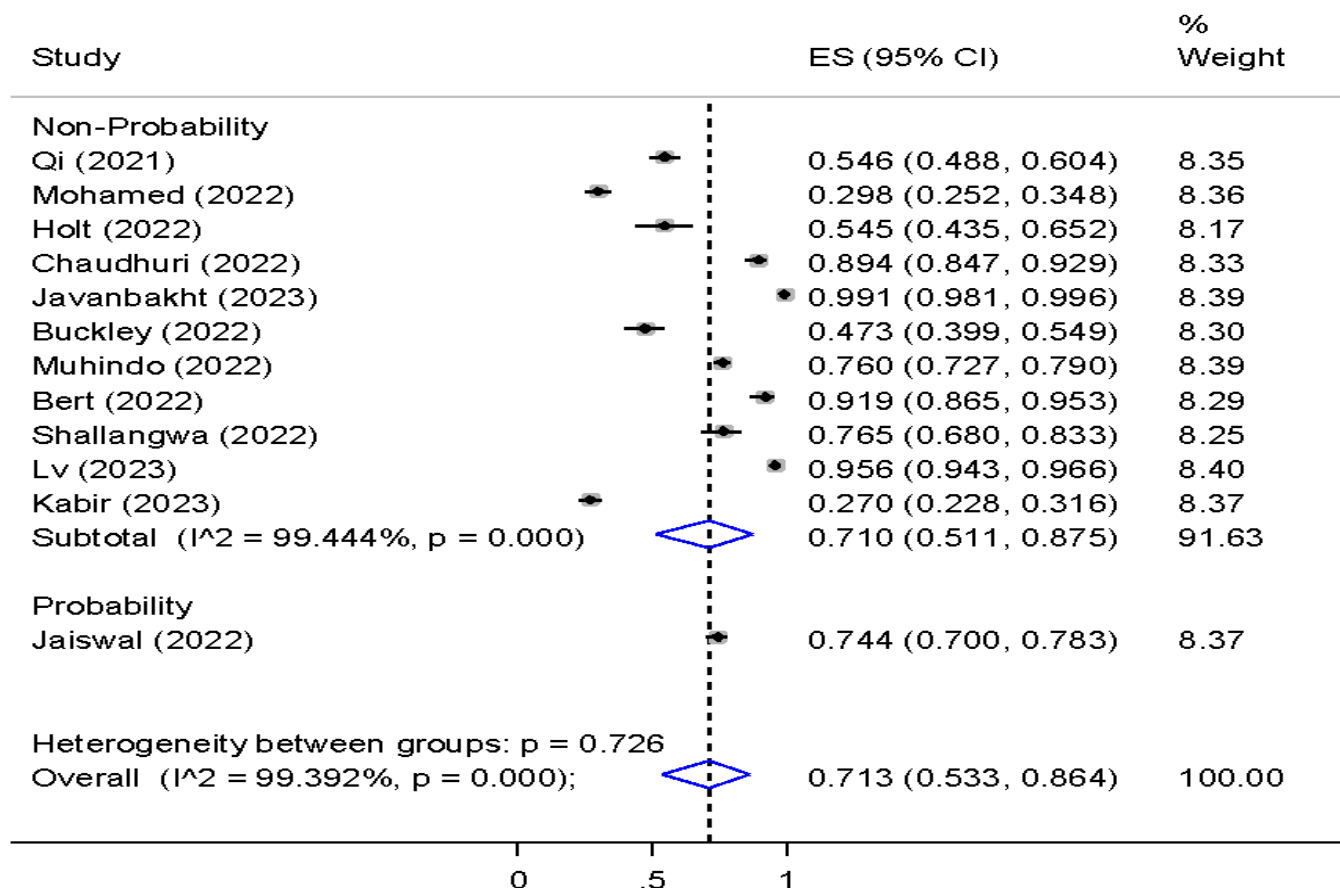

D-19 Vaccine Uptake Among PLHIV Who Indicated Acceptance (By Sampling Method)

**Supplementary Figure 18: Forest plots of the results of random-effects model meta-analysis of the prevalence (%) of COVID-19 vaccine uptake among PLHIV who indicated acceptance according to the sampling method employed (n = 13 studies, N = 6,186 participants) pooled using inverse variance weights. Each black-colored solid square represents the effect size of each**

characteristic, while the ends of the adjoining horizontal lines represent lower (left) and upper (right) confidence intervals. The blue-colored hollow diamond at the bottom denotes the overall estimated effect size and the 95% CI. All statistics were based on a two-sided t-test. ES, Effect Size.

## SECTION C

Results of the meta-analysis of COVID-19 vaccine acceptance and uptake using peer-reviewed studies only

**Fig a: Begg's funnel plot of included studies**

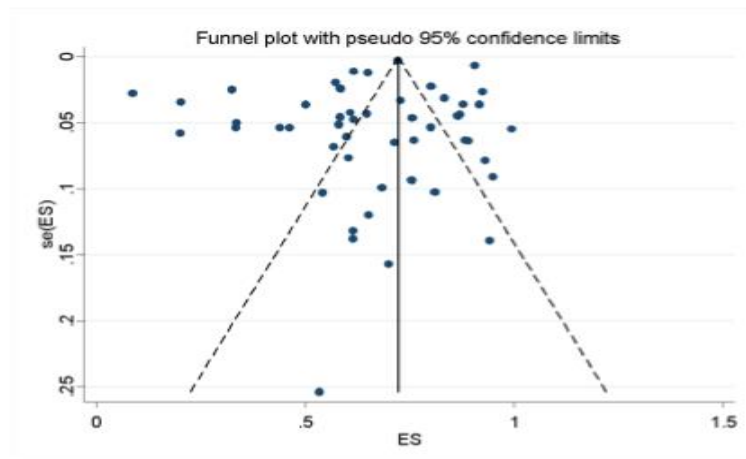

**Figure b: Egger graph of included studies (P = 0.102)**

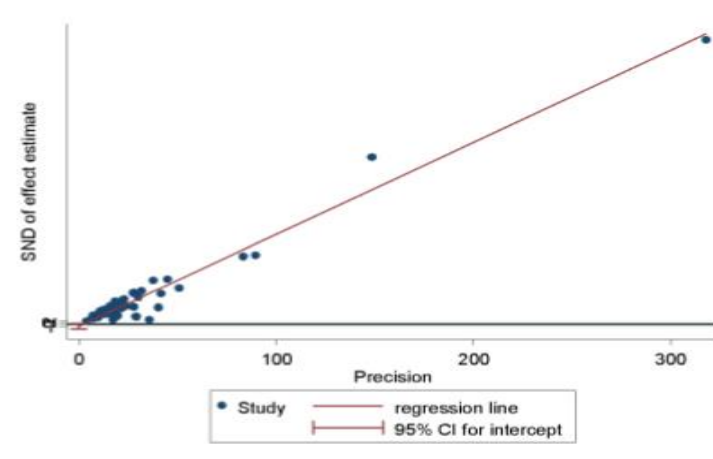

**Supplementary Figure 19: Publication bias assessment of studies reporting COVID-19 vaccine acceptance rate**

**Figure c: Begg's funnel plot of included studies**

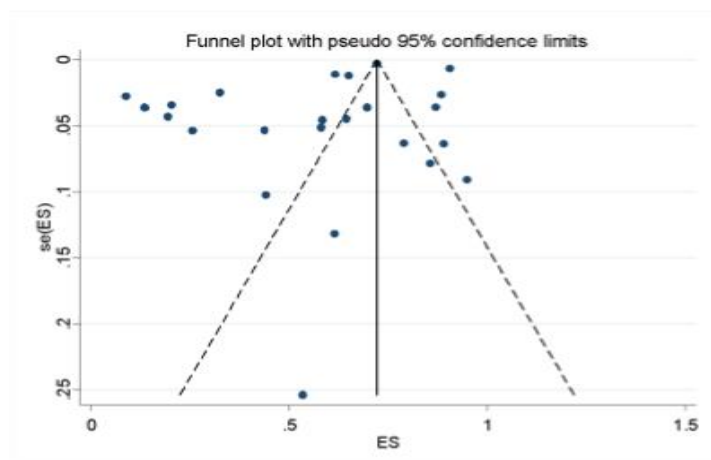

**Figure d: Egger graph of included studies (P = 0.059)**

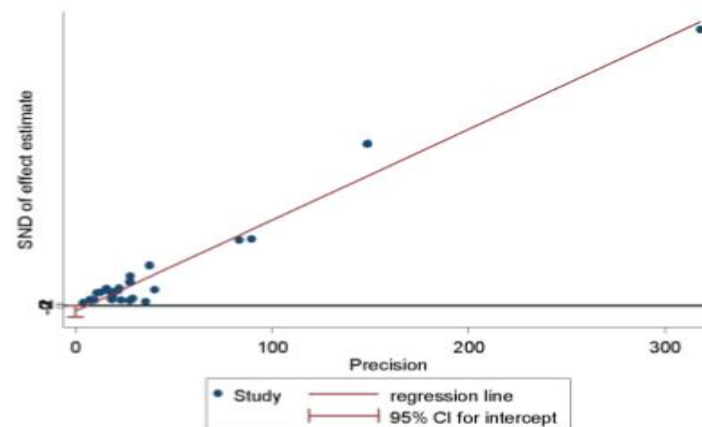

**Supplementary Figure 20: Publication bias assessment of studies reporting COVID-19 vaccine uptake rate**

**Figure e: Begg's funnel plot of included studies**

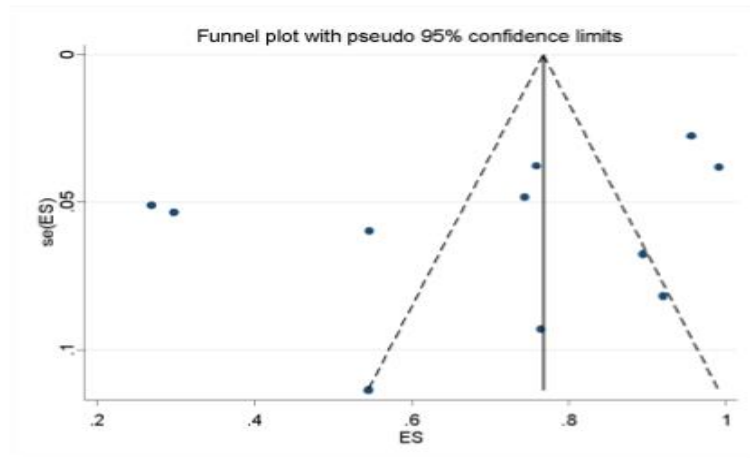

**Figure f: Egger graph of included studies (P = 0.203)**

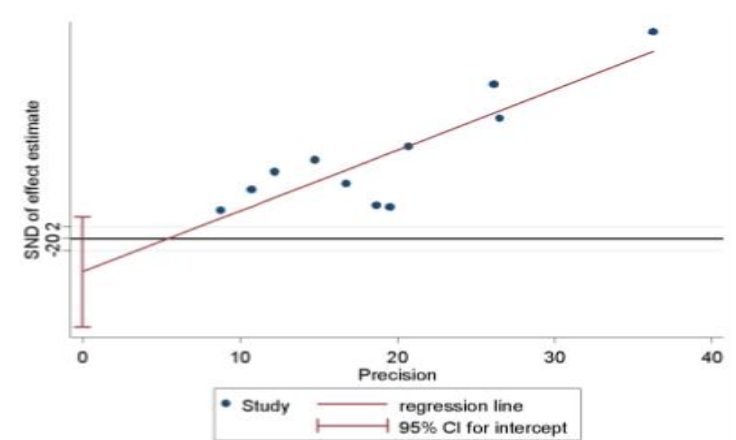

**Supplementary Figure 21: Assessment of publication bias among studies reporting each of the three outcomes. All the statistical tests were two-sided. ES, Effect Size. a,** Begg's funnel plot of included studies reporting acceptance rate (n = 50 studies). **b,** Egger graph of included studies reporting acceptance rate (n = 50 studies). **c,** Begg's funnel plot of included studies reporting uptake rate (n = 24 studies). **d,** Egger graph of included studies reporting uptake rate (n = 24 studies). **e,** Begg's funnel plot of studies reporting uptake rate in PLHIV who indicated acceptance (n = 12 studies). **f,** Egger graph of studies reporting uptake among accepting group (n = 12 studies).

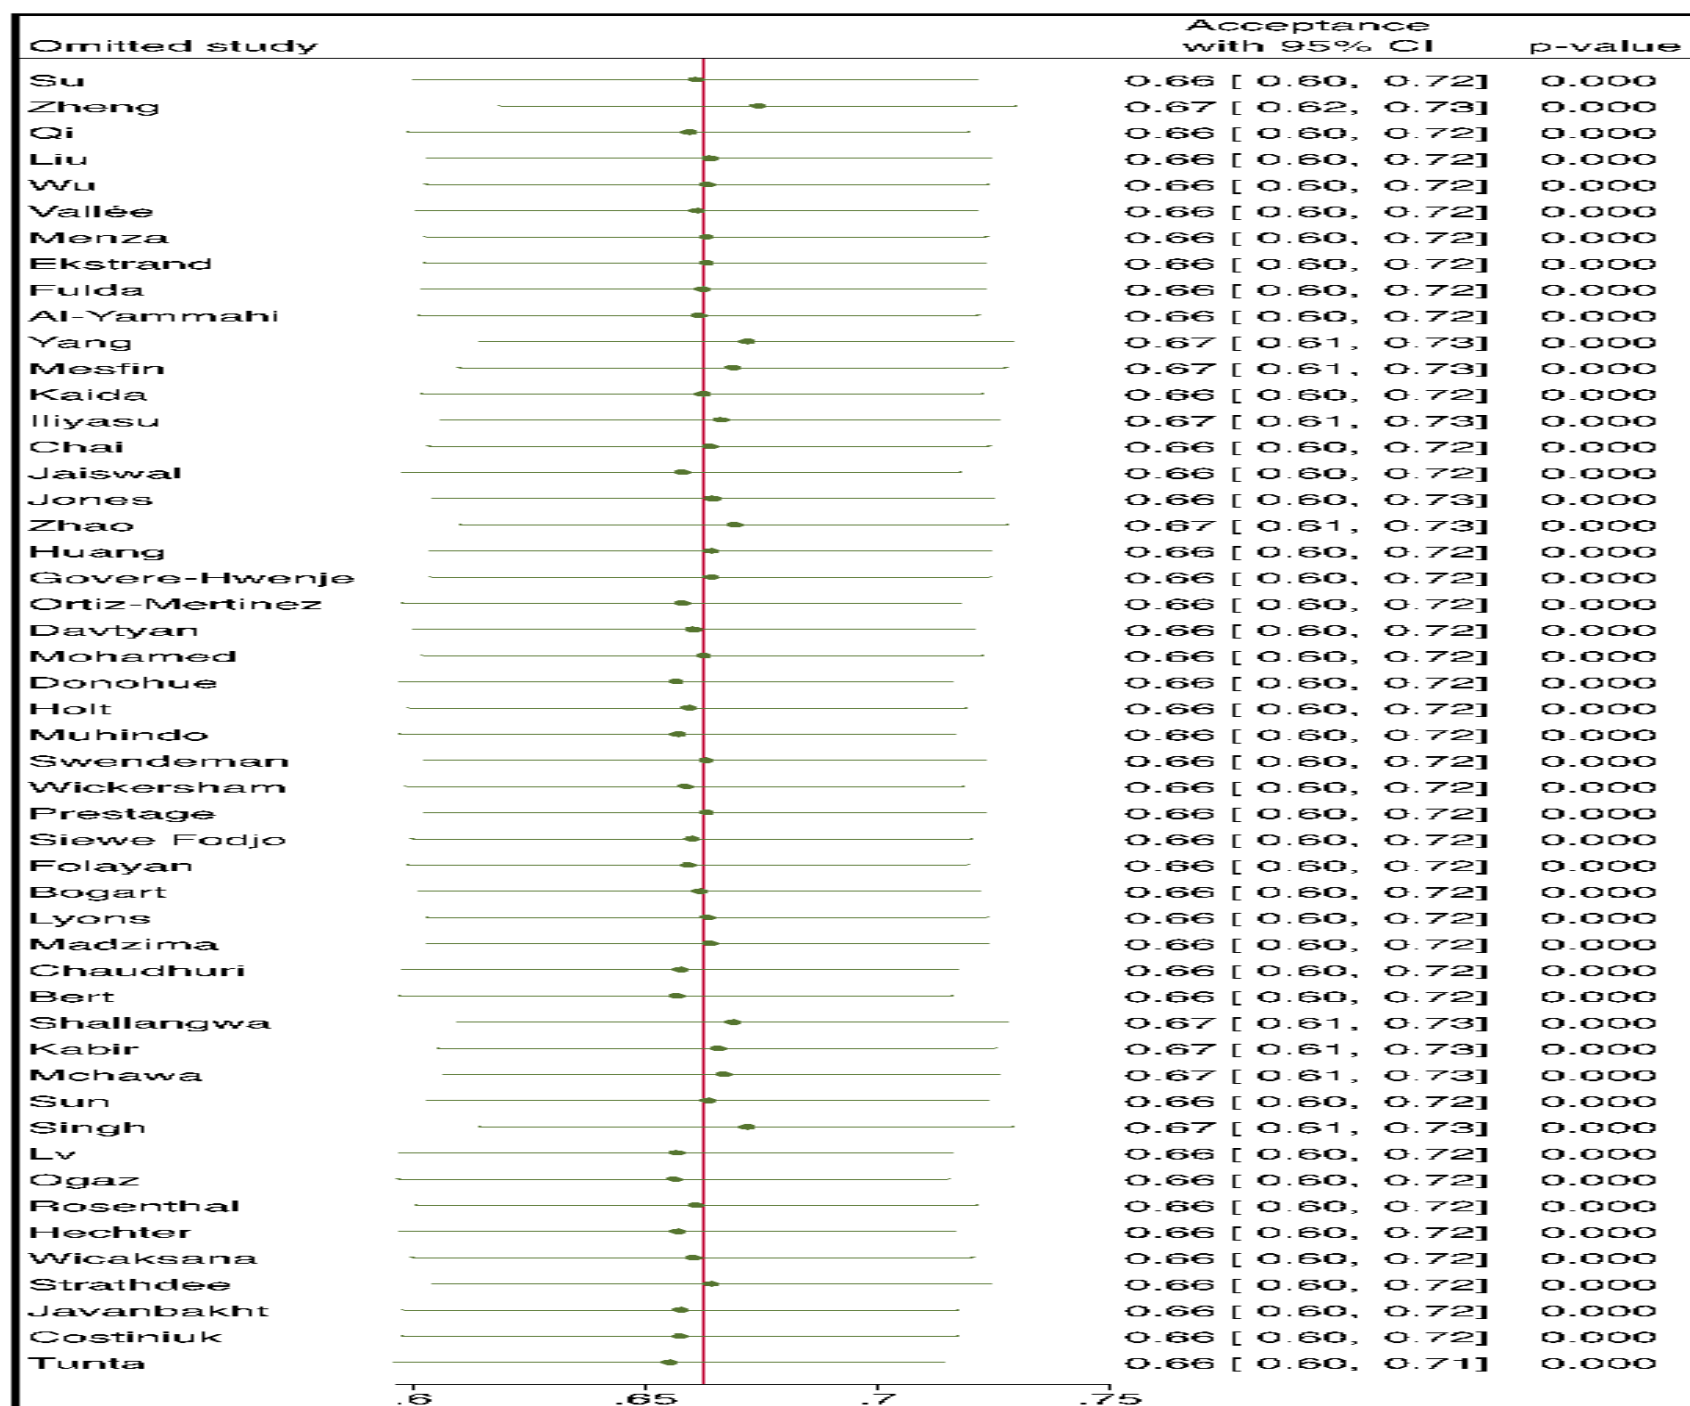

Random-effects REML model

**Supplementary Figure 22: Forest plot of sensitivity analyses for each study reporting the acceptance rate of the COVID-19 vaccine among PLHIV using random effects model meta-analysis. Each solid square represents the effect size of each characteristic, while the ends of the adjoining horizontal lines represent lower (left) and upper (right) confidence intervals. (n = 50 studies).**

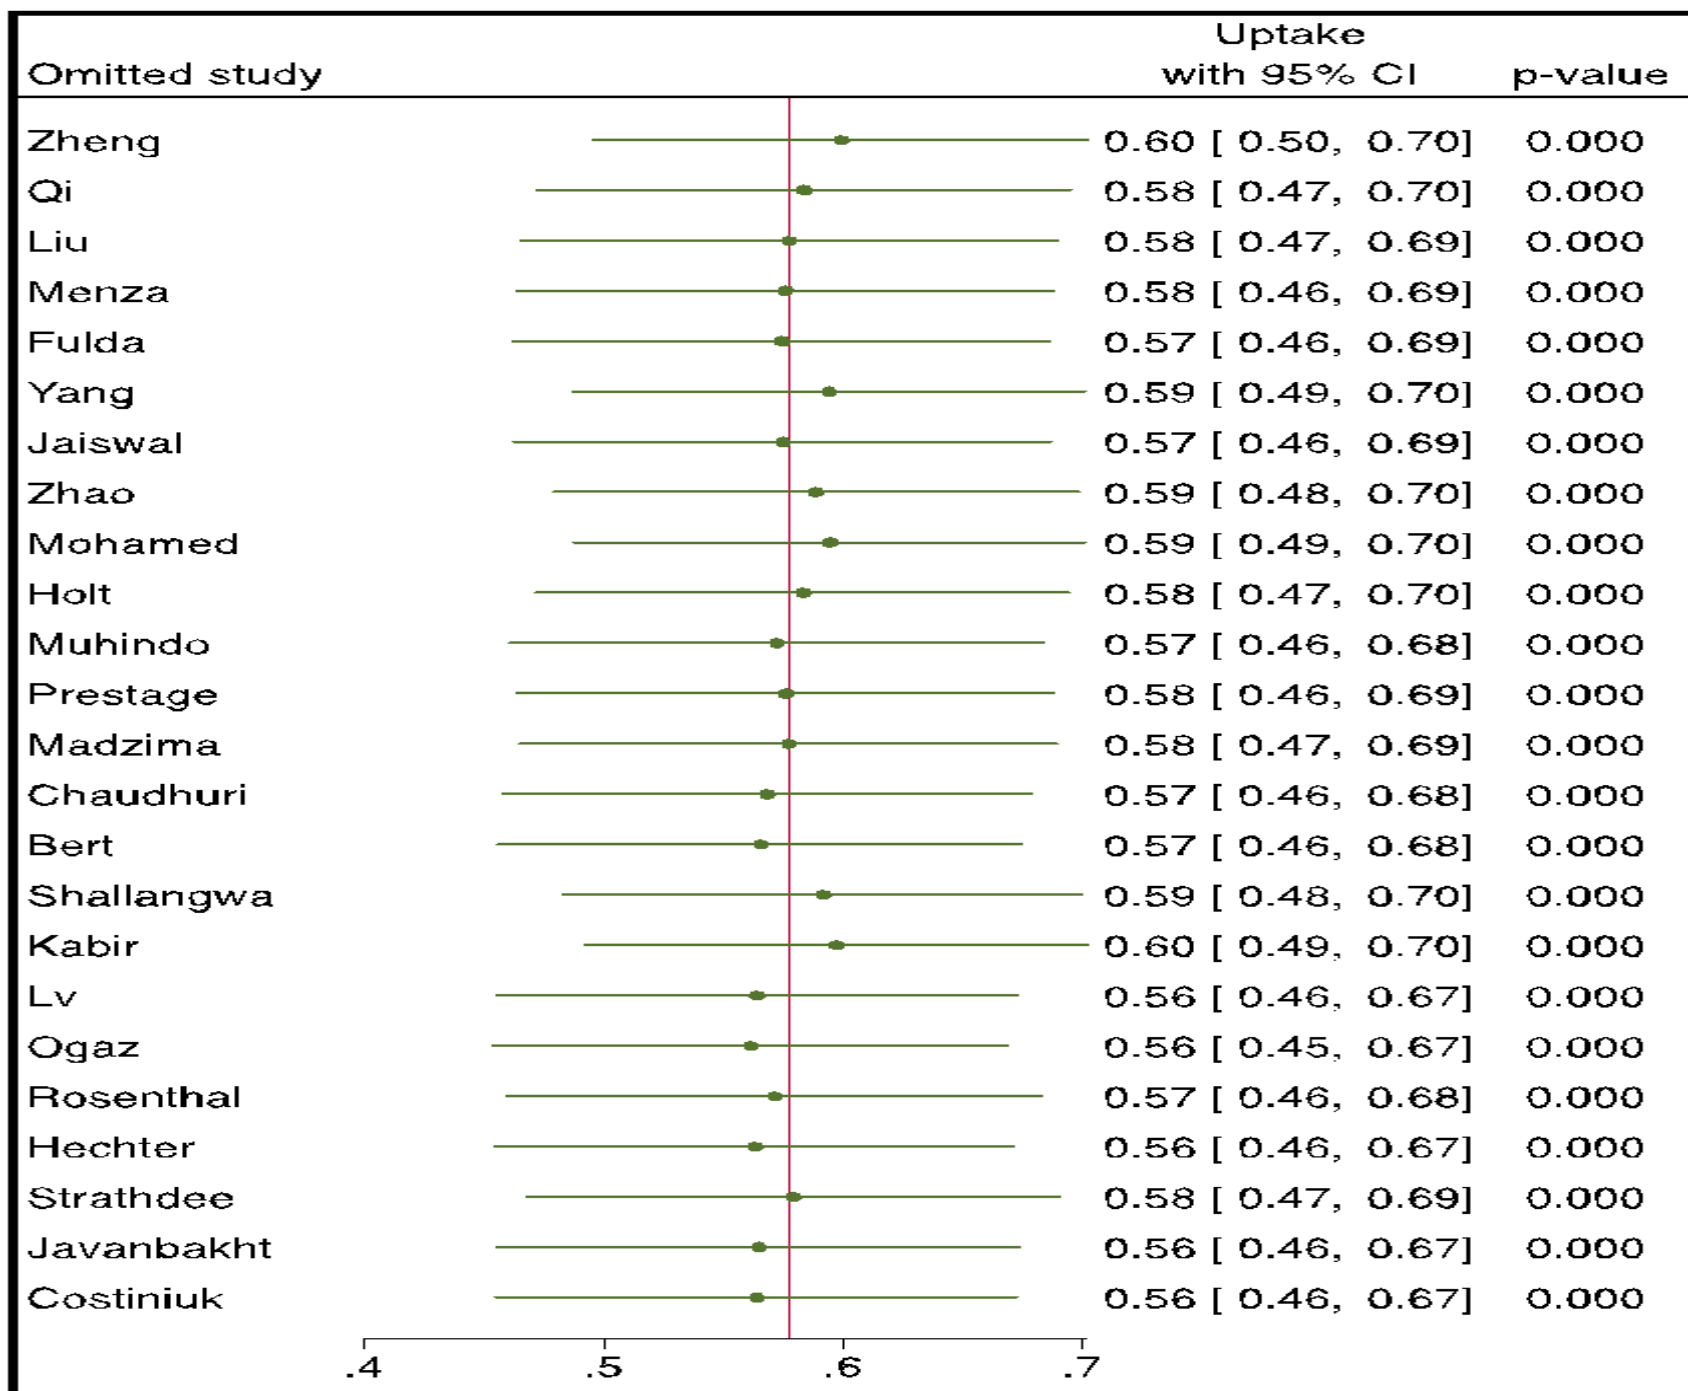

Random-effects REML model

**Supplementary Figure 23: Forest plot of sensitivity analyses for each study reporting the uptake rate of the COVID-19 vaccine among PLHIV using random effects model meta-analysis. Each solid square represents the effect size of each characteristic, while the ends of the adjoining horizontal lines represent lower (left) and upper (right) confidence intervals. (n = 24 studies).**

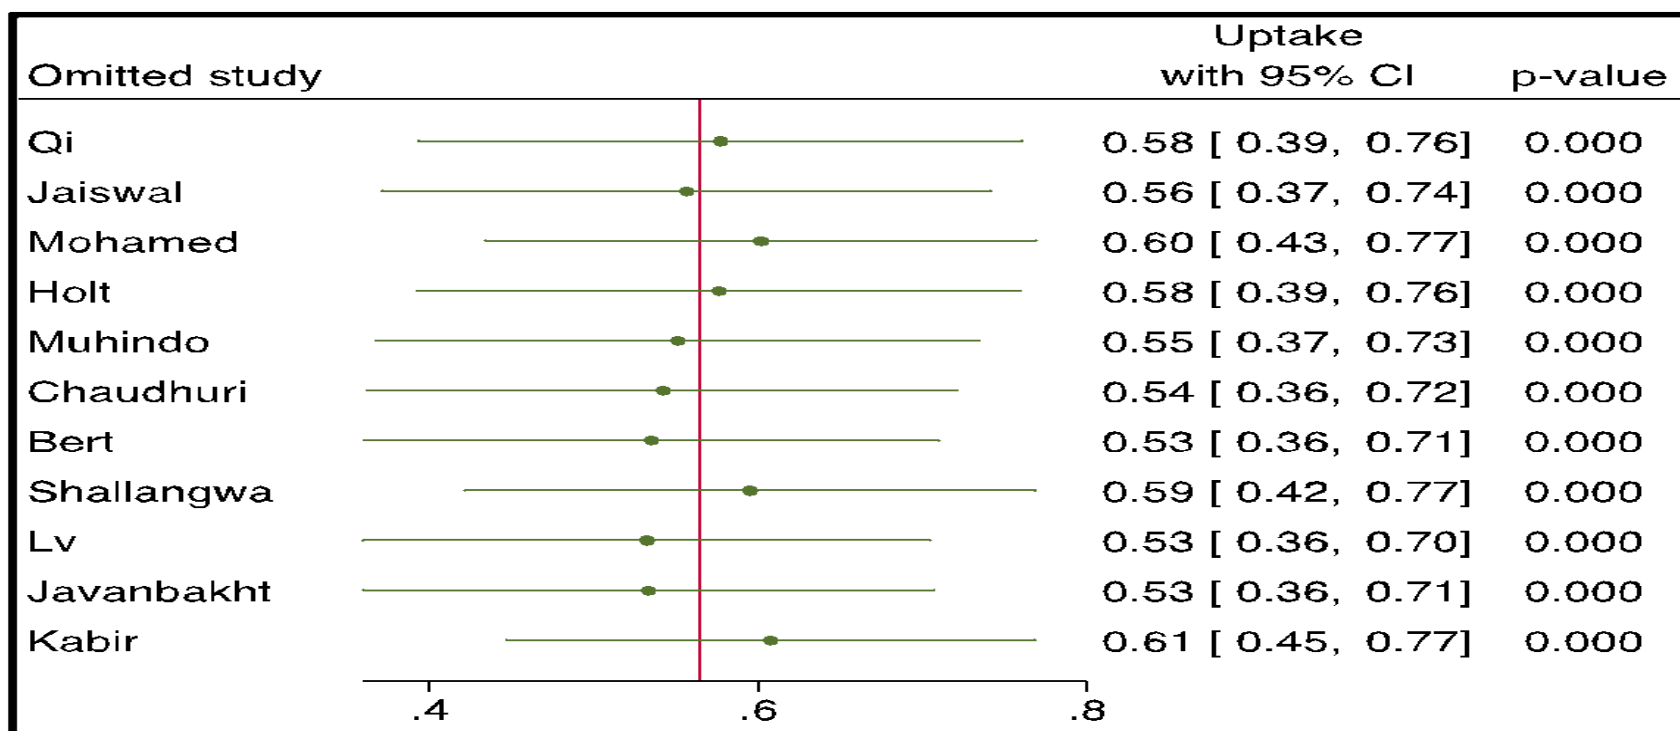

Random-effects REML model

**Supplementary Figure 24: Forest plot of sensitivity analyses for each study reporting the uptake rate of the COVID-19 vaccine among PLHIV who indicated acceptance using random effects model meta-analysis. Each solid square represents the effect size of each characteristic, while the ends of the adjoining horizontal lines represent lower (left) and upper (right) confidence intervals. (n = 12 studies).**



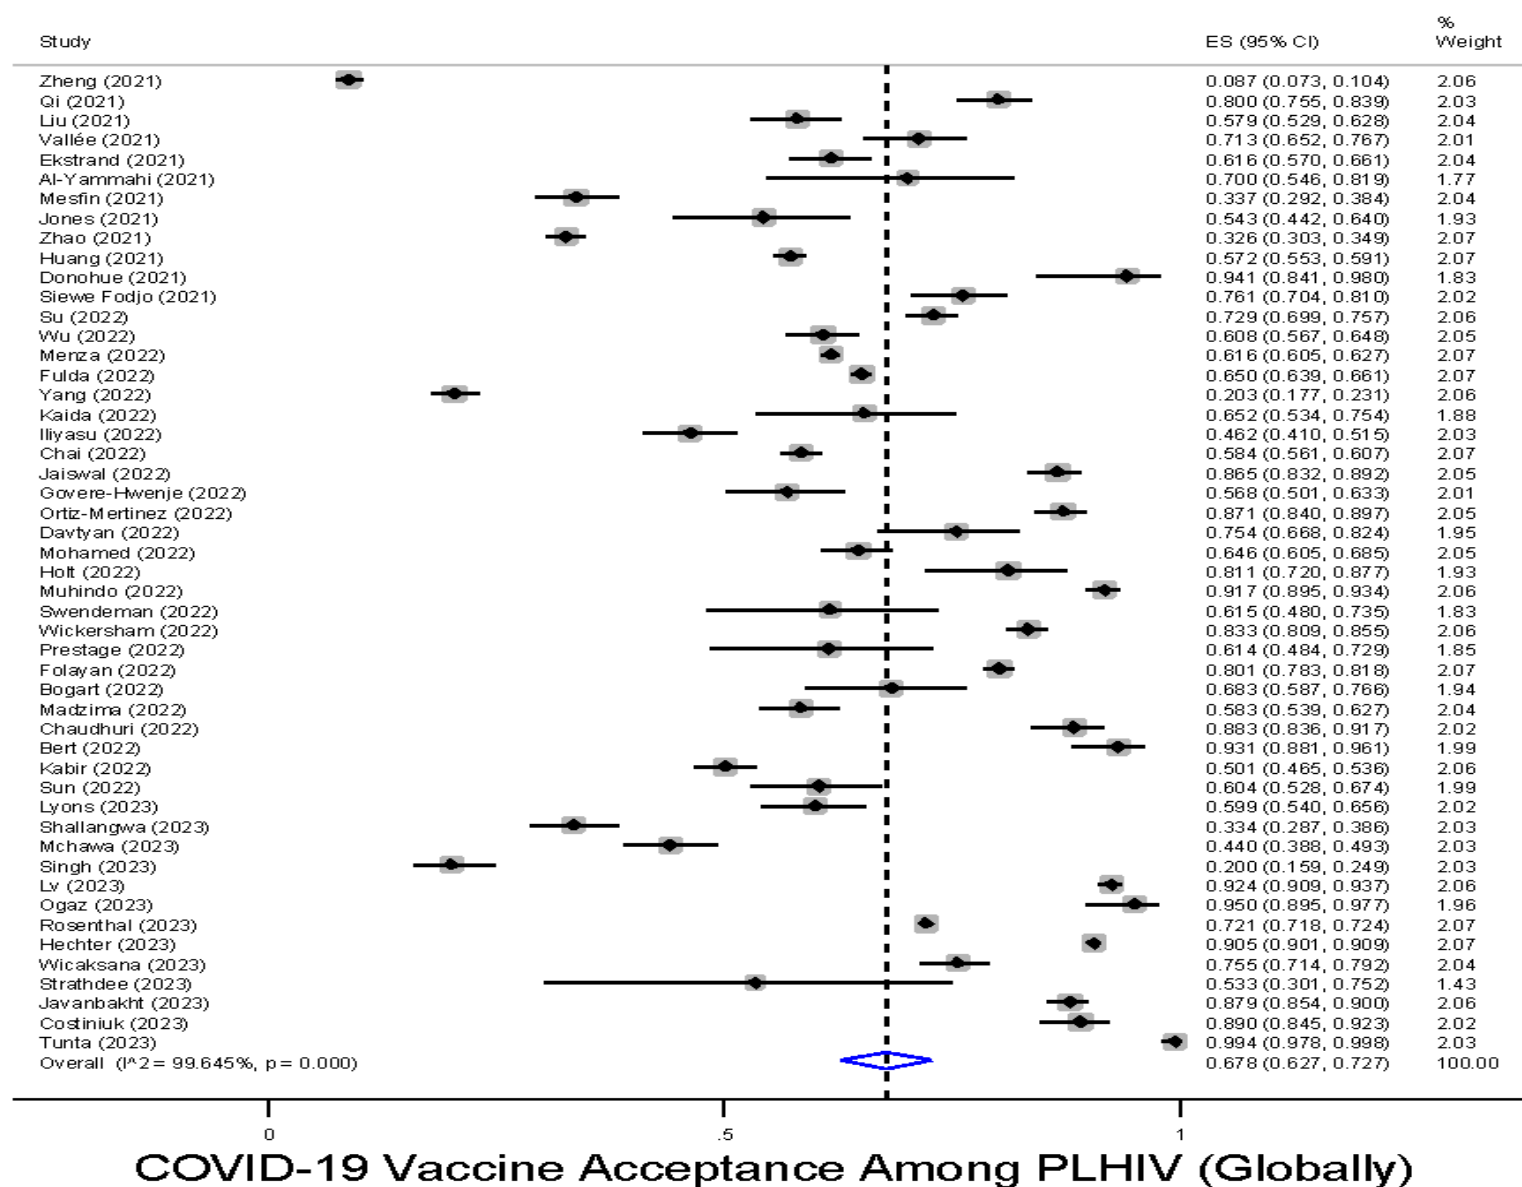

**Supplementary Figure 25: Forest plots of the results of random-effects model meta-analysis of the prevalence (%) of COVID-19 vaccine acceptance globally (n = 50 studies) pooled using inverse variance weights. Each black-colored solid square represents the effect size of each characteristic, while the ends of the adjoining horizontal lines represent lower (left) and upper (right) confidence intervals. The blue-colored hollow diamond at the bottom denotes the overall estimated effect size and the 95% CI. All statistics were based on a two-sided t-test. ES, Effect Size.**

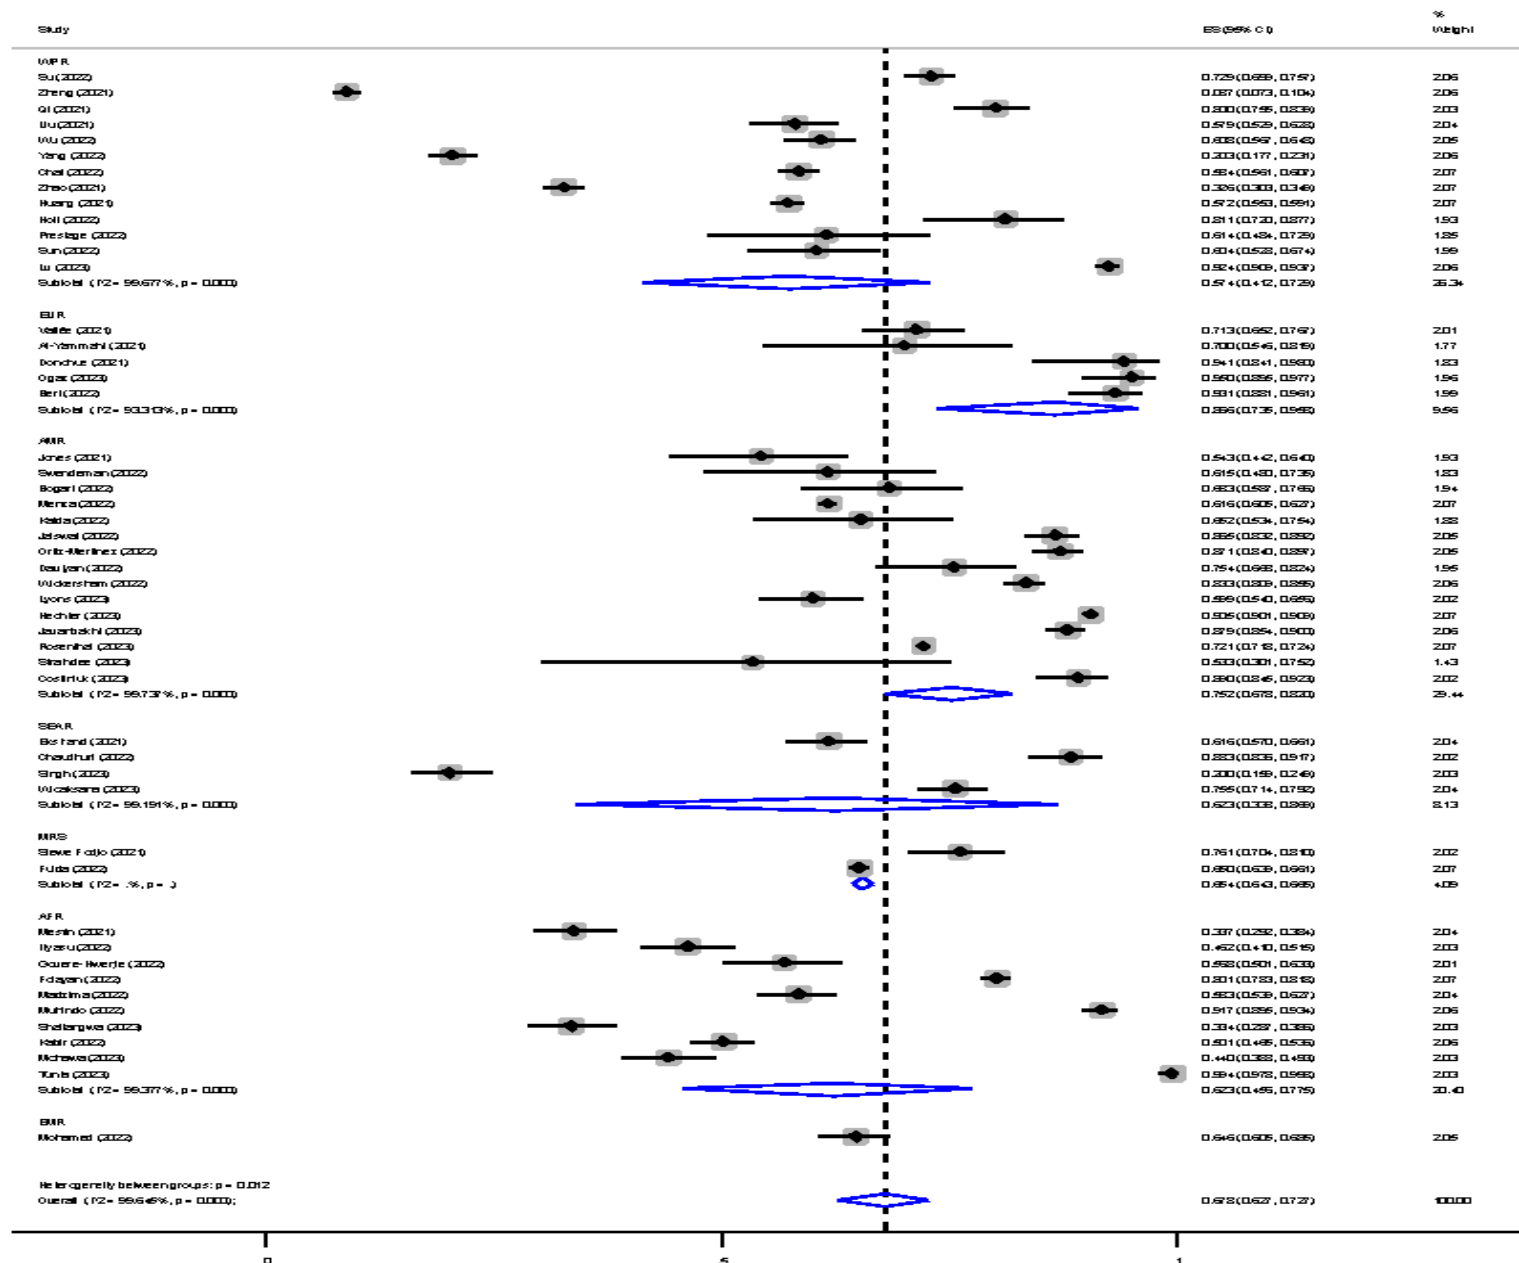

COVID-19 Vaccine Acceptance Among PLHIV (By WHO Region)

**Supplementary Figure 26: Forest plots of the results of random-effects model meta-analysis of the prevalence (%) of COVID-19 vaccine acceptance according to the WHO region (n = 50 studies) pooled using inverse variance weights. Each black-colored solid square represents the effect size of each characteristic, while the ends of the adjoining horizontal lines represent lower (left) and upper (right) confidence intervals. The blue-colored hollow diamond at the bottom denotes the overall estimated effect size and the 95% CI. All statistics were based on a two-sided t-test. ES, Effect Size.**

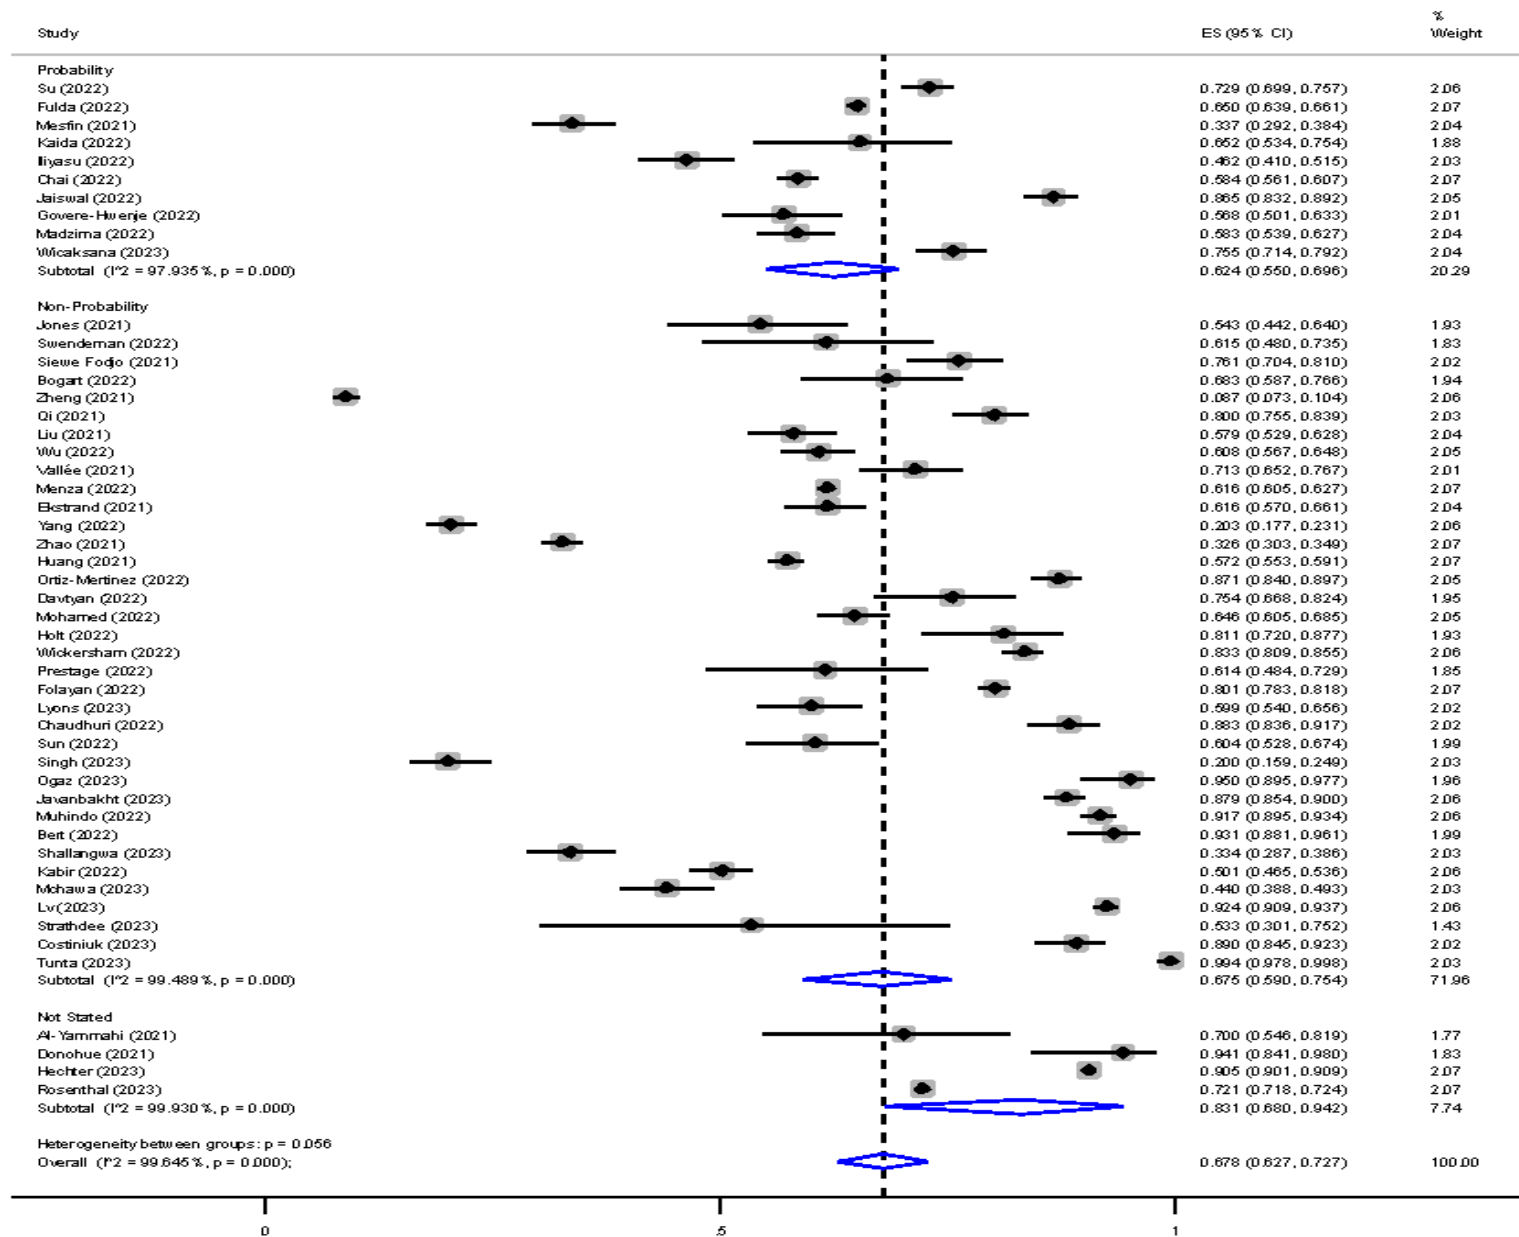

COVID-19 Vaccine Acceptance Among PLHIV (By Sampling Method)

**Supplementary Figure 27: Forest plots of the results of random-effects model meta-analysis of the prevalence (%) of COVID-19 vaccine acceptance according to the sampling method employed (n = 50 studies) pooled using inverse variance weights. Each black-colored solid square represents the effect size of each characteristic, while the ends of the adjoining horizontal lines represent lower (left) and upper (right) confidence intervals. The blue-colored hollow diamond at the bottom denotes the overall estimated effect size and the 95% CI. All statistics were based on a two-sided t-test. ES, Effect Size.**

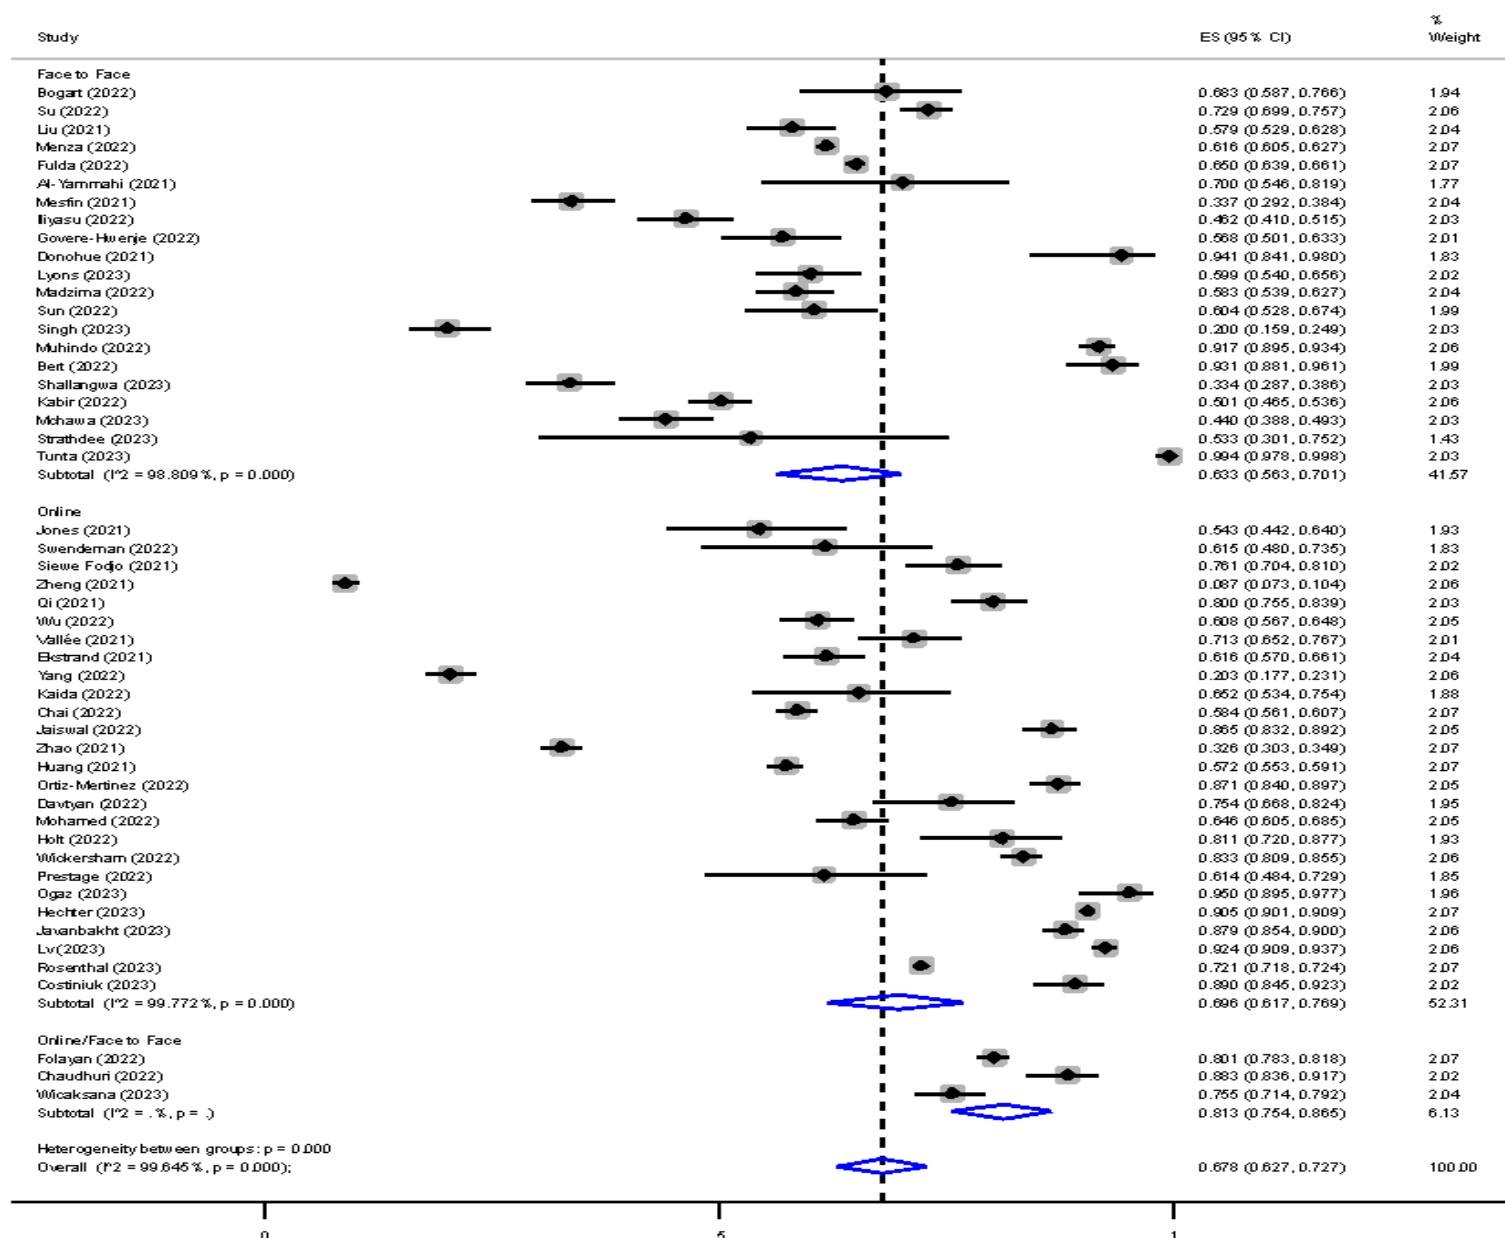

COVID-19 Vaccine Acceptance Among PLHIV (By Data Collection Method)<sup>66</sup>

**Supplementary Figure 28: Forest plots of the results of random-effects model meta-analysis of the prevalence (%) of COVID-19 vaccine acceptance according to the data collection method (n = 50 studies) pooled using inverse variance weights. Each black-colored solid square represents the effect size of each characteristic, while the ends of the adjoining horizontal lines represent lower (left) and upper (right) confidence intervals. The blue-colored hollow diamond at the bottom denotes the overall estimated effect size and the 95% CI. All statistics were based on a two-sided t-test. ES, Effect Size.**

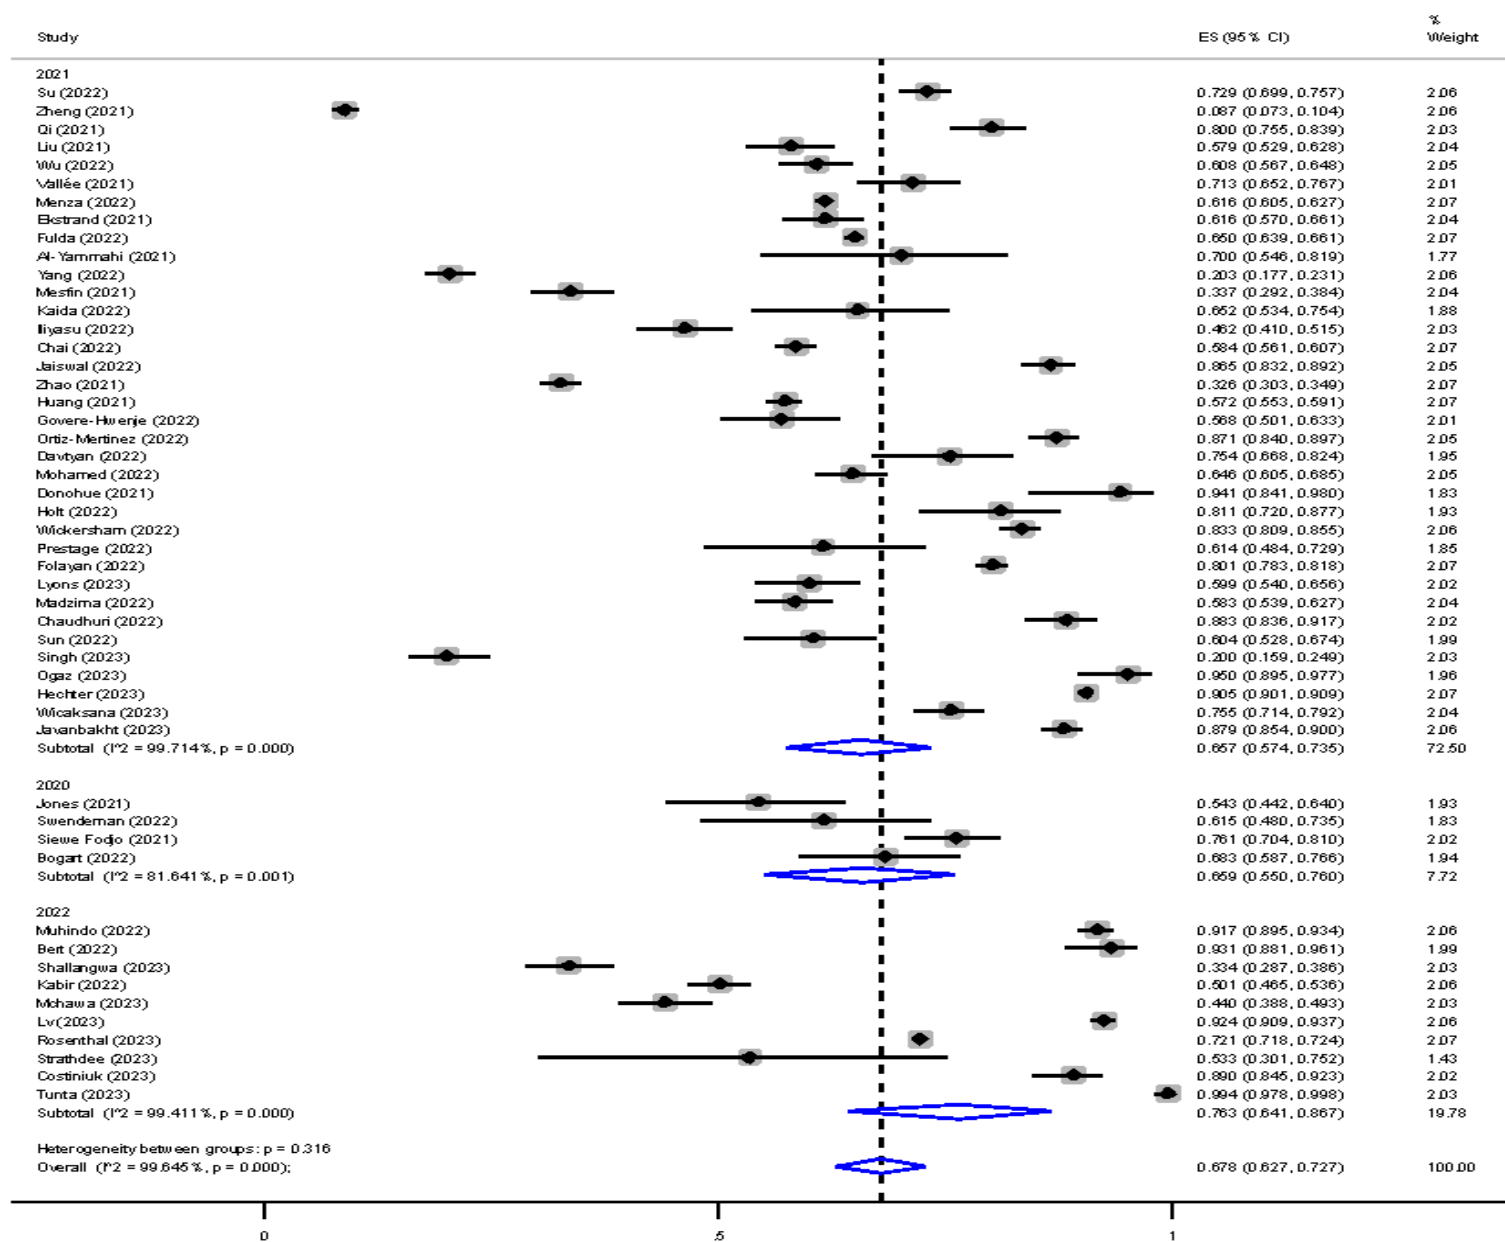

COVID-19 Vaccine Acceptance Among PLHIV (By Study Year)

**Supplementary Figure 29: Forest plots of the results of random-effects model meta-analysis of the prevalence (%) of COVID-19 vaccine acceptance according to the study year (n = 50 studies) pooled using inverse variance weights. Each black-colored solid square represents the effect size of each characteristic, while the ends of the adjoining horizontal lines represent lower (left) and upper (right) confidence intervals. The blue-colored hollow diamond at the bottom denotes the overall estimated effect size and the 95% CI. All statistics were based on a two-sided t-test. ES, Effect Size.**

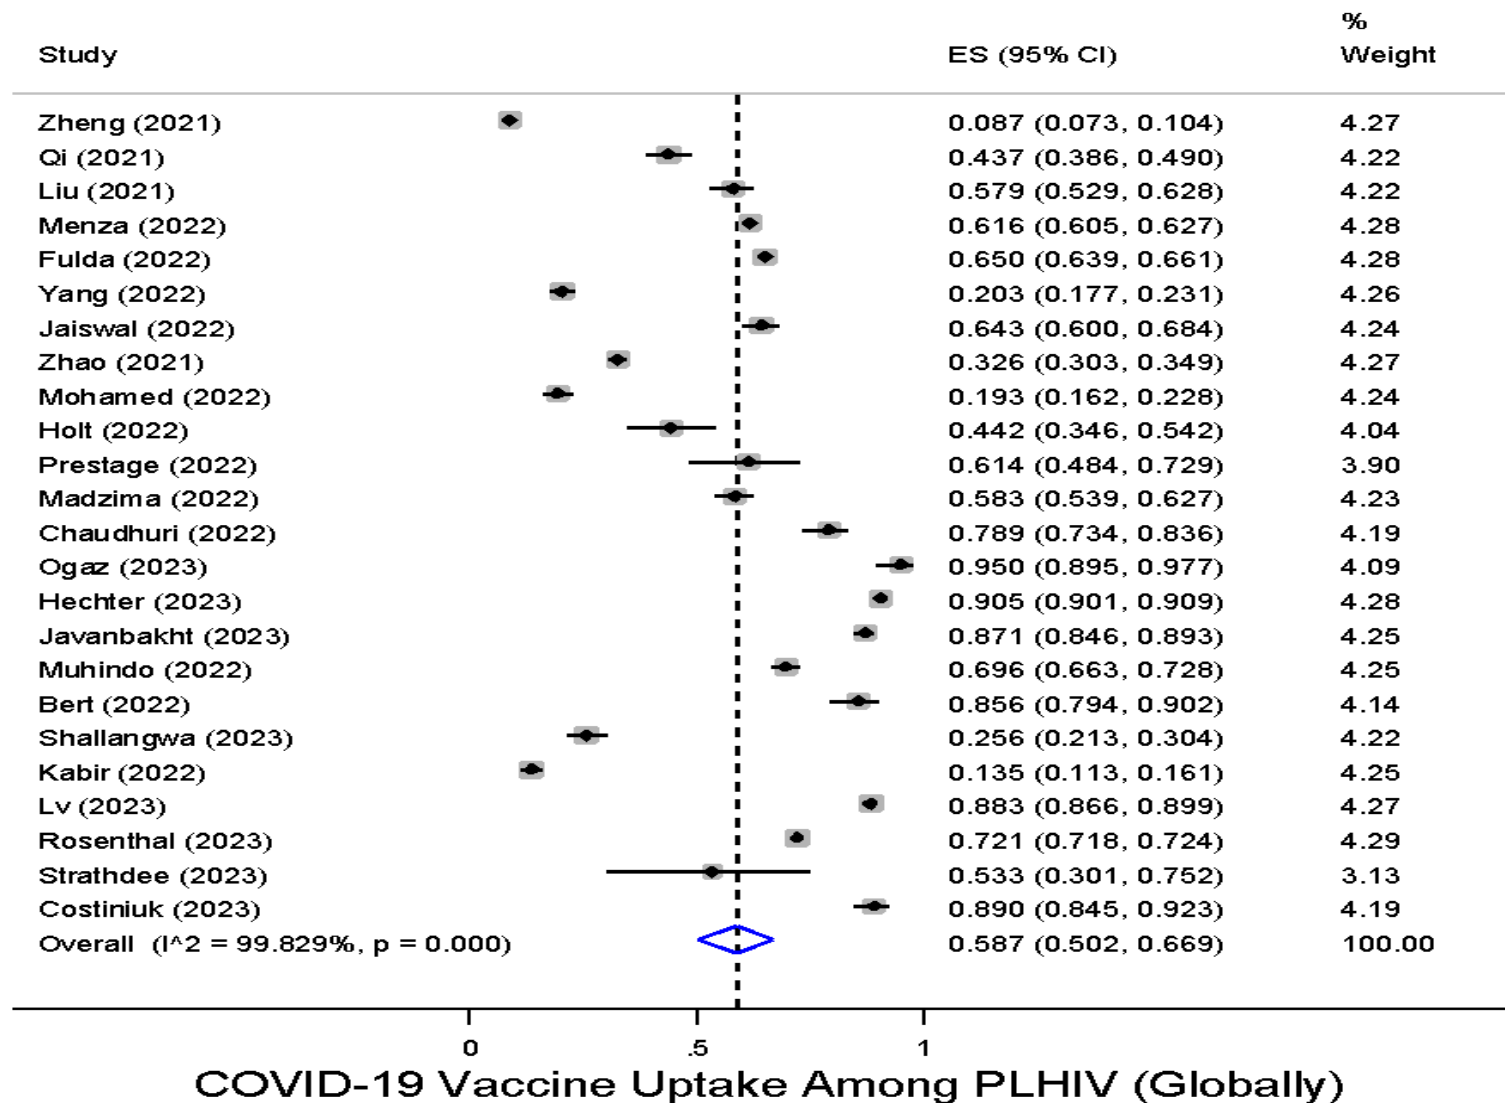

**Supplementary Figure 30: Forest plots of the results of random-effects model meta-analysis of the prevalence (%) of COVID-19 vaccine uptake among PLHIV globally (n = 24 studies) pooled using inverse variance weights. Each black-colored solid square represents the effect size of each characteristic, while the ends of the adjoining horizontal lines represent lower (left) and upper (right) confidence intervals. The blue-colored hollow diamond at the bottom denotes the overall estimated effect size and the 95% CI. All statistics were based on a two-sided t-test. ES, Effect Size.**

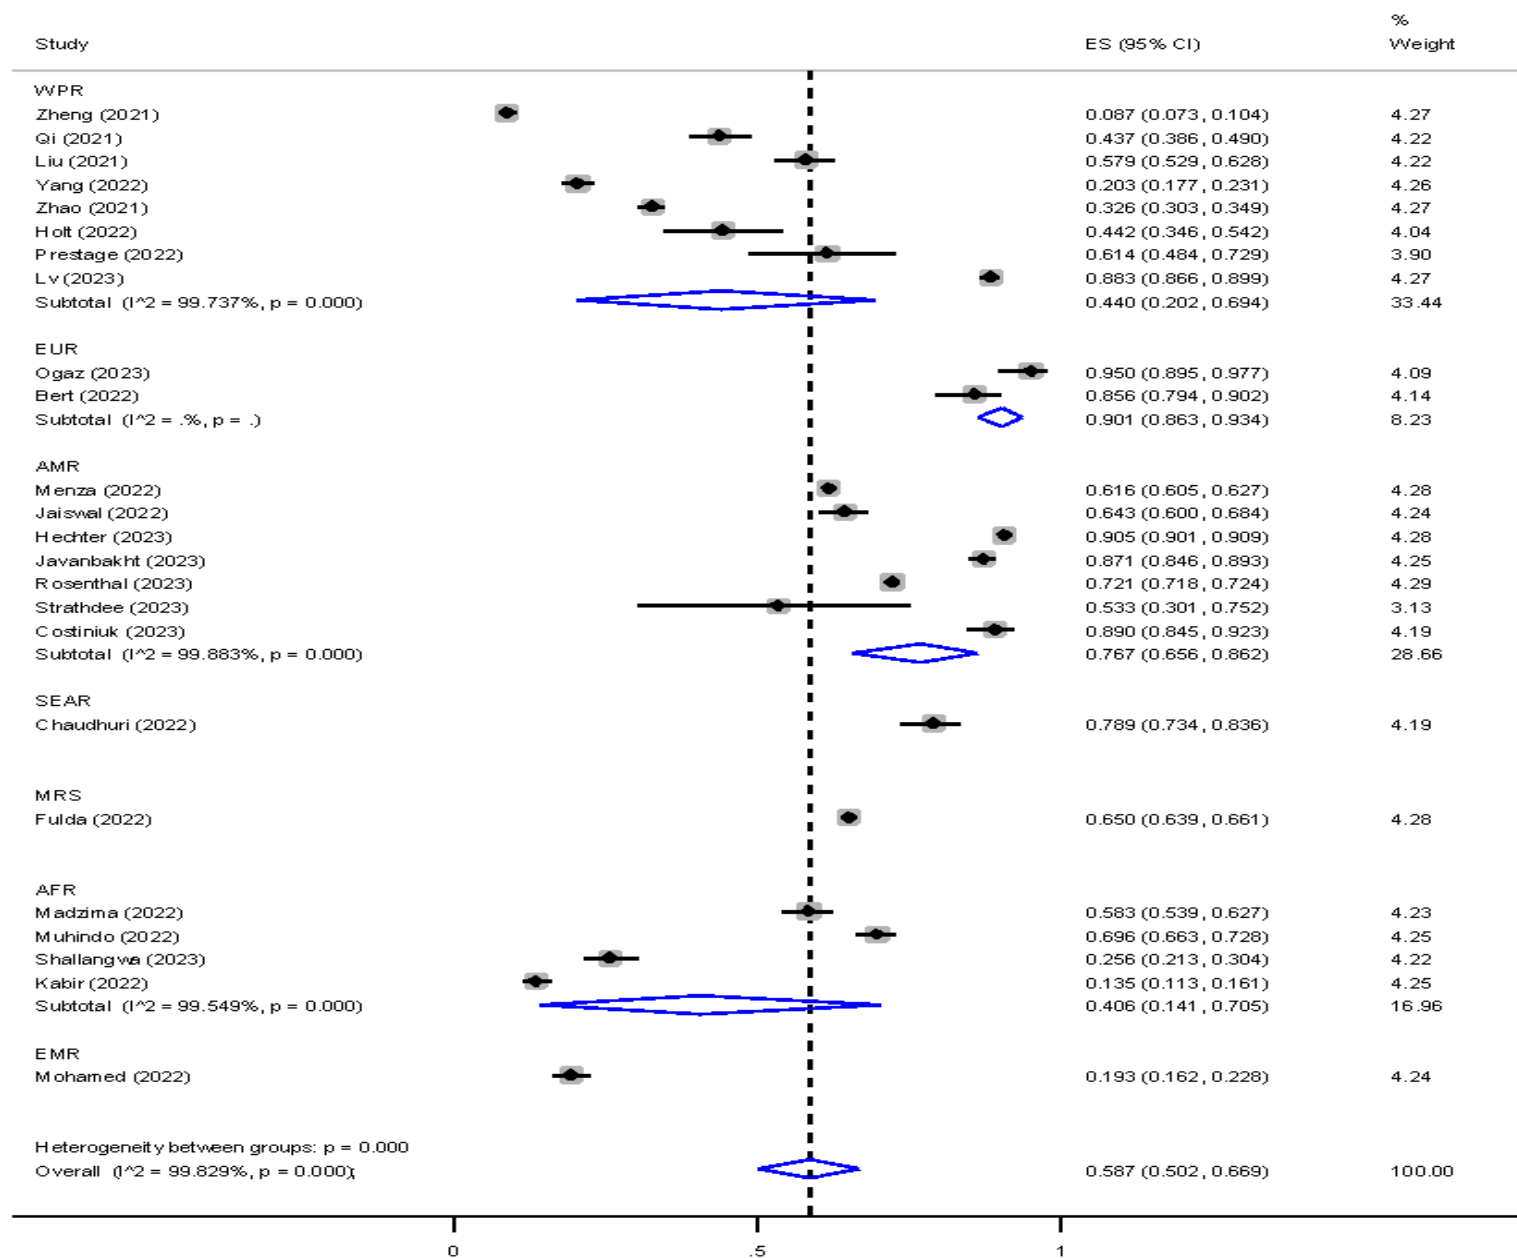

COVID-19 Vaccine uptake Among PLHIV (By WHO Region)

**Supplementary Figure 31: Forest plots of the results of random-effects model meta-analysis of the prevalence (%) of COVID-19 vaccine uptake among PLHIV according to the WHO region (n = 24 studies) pooled using inverse variance weights. Each black-colored solid square represents the effect size of each characteristic, while the ends of the adjoining horizontal lines represent lower (left) and upper (right) confidence intervals. The blue-colored hollow diamond at the bottom denotes the overall estimated effect size and the 95% CI. All statistics were based on a two-sided t-test. ES, Effect Size.**

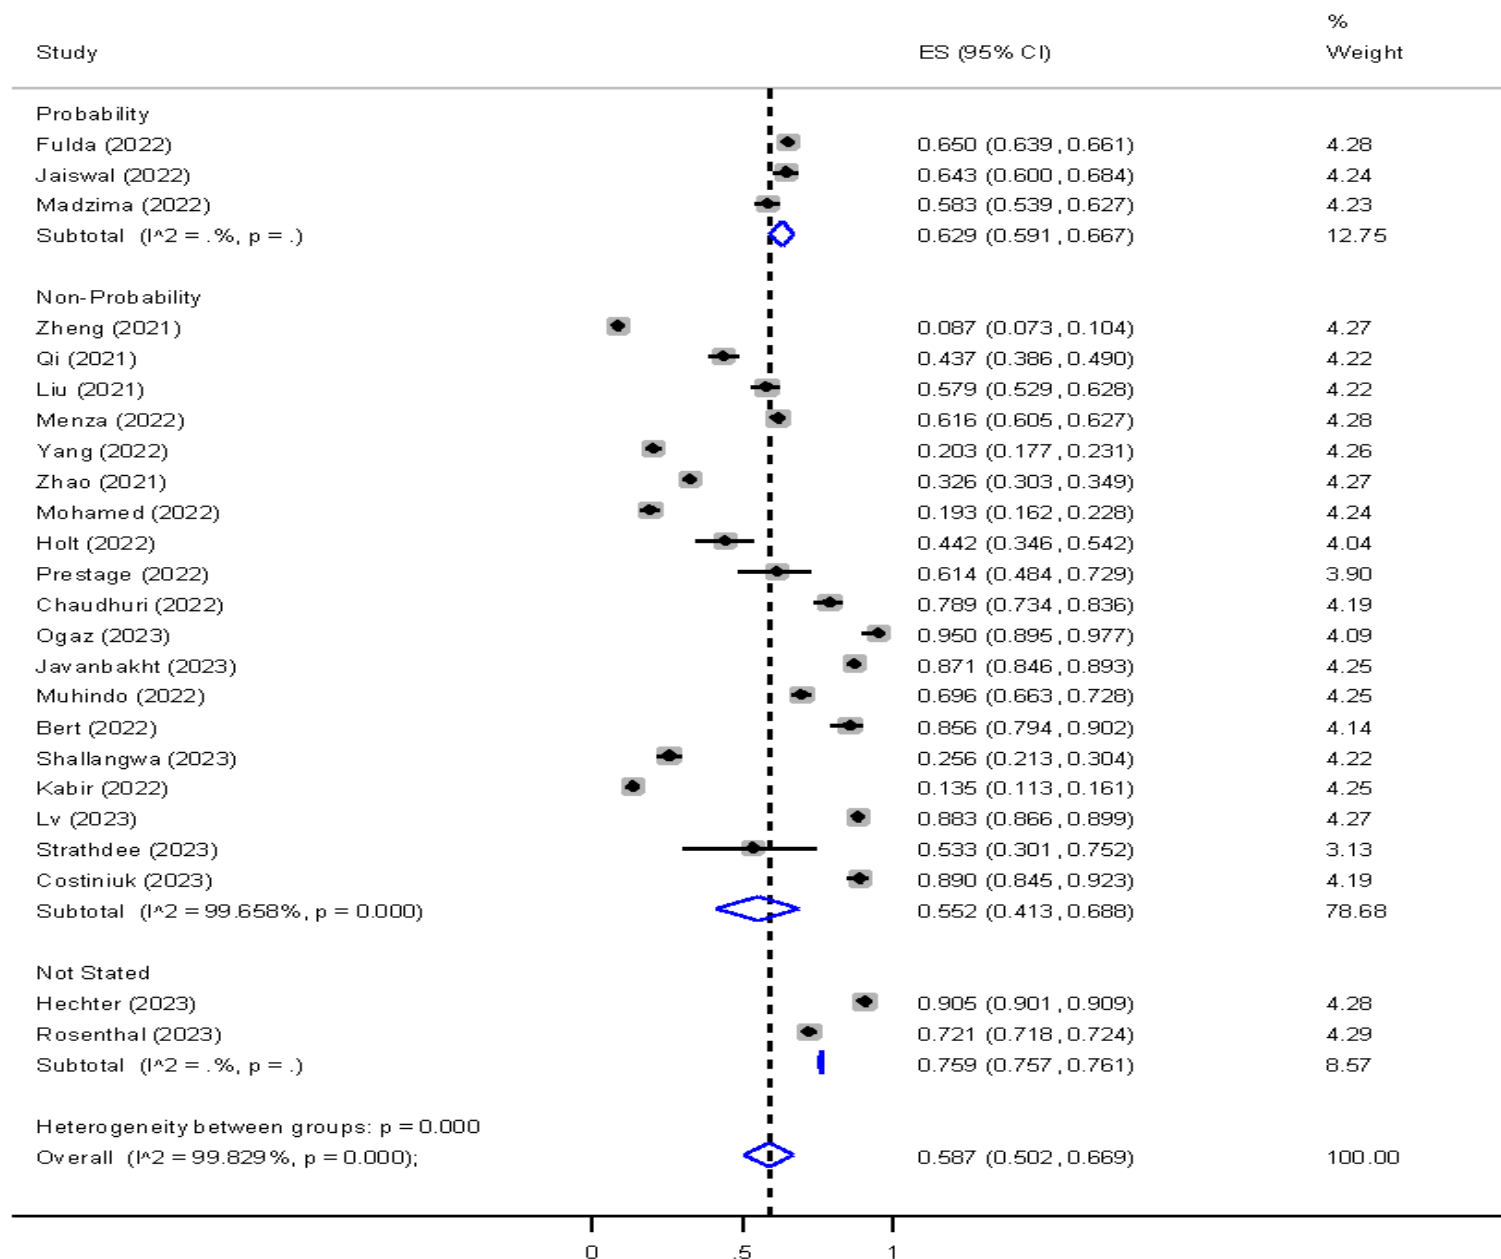

COVID-19 Vaccine Uptake Among PLHIV (By Sampling Method)

**Supplementary Figure 32: Forest plots of the results of random-effects model meta-analysis of the prevalence (%) of COVID-19 vaccine uptake among PLHIV according to the sampling method (n = 24 studies) pooled using inverse variance weights. Each black-colored solid square represents the effect size of each characteristic, while the ends of the adjoining horizontal lines represent lower (left) and upper (right) confidence intervals. The blue-colored hollow diamond at the bottom denotes the overall estimated effect size and the 95% CI. All statistics were based on a two-sided t-test. ES, Effect Size.**

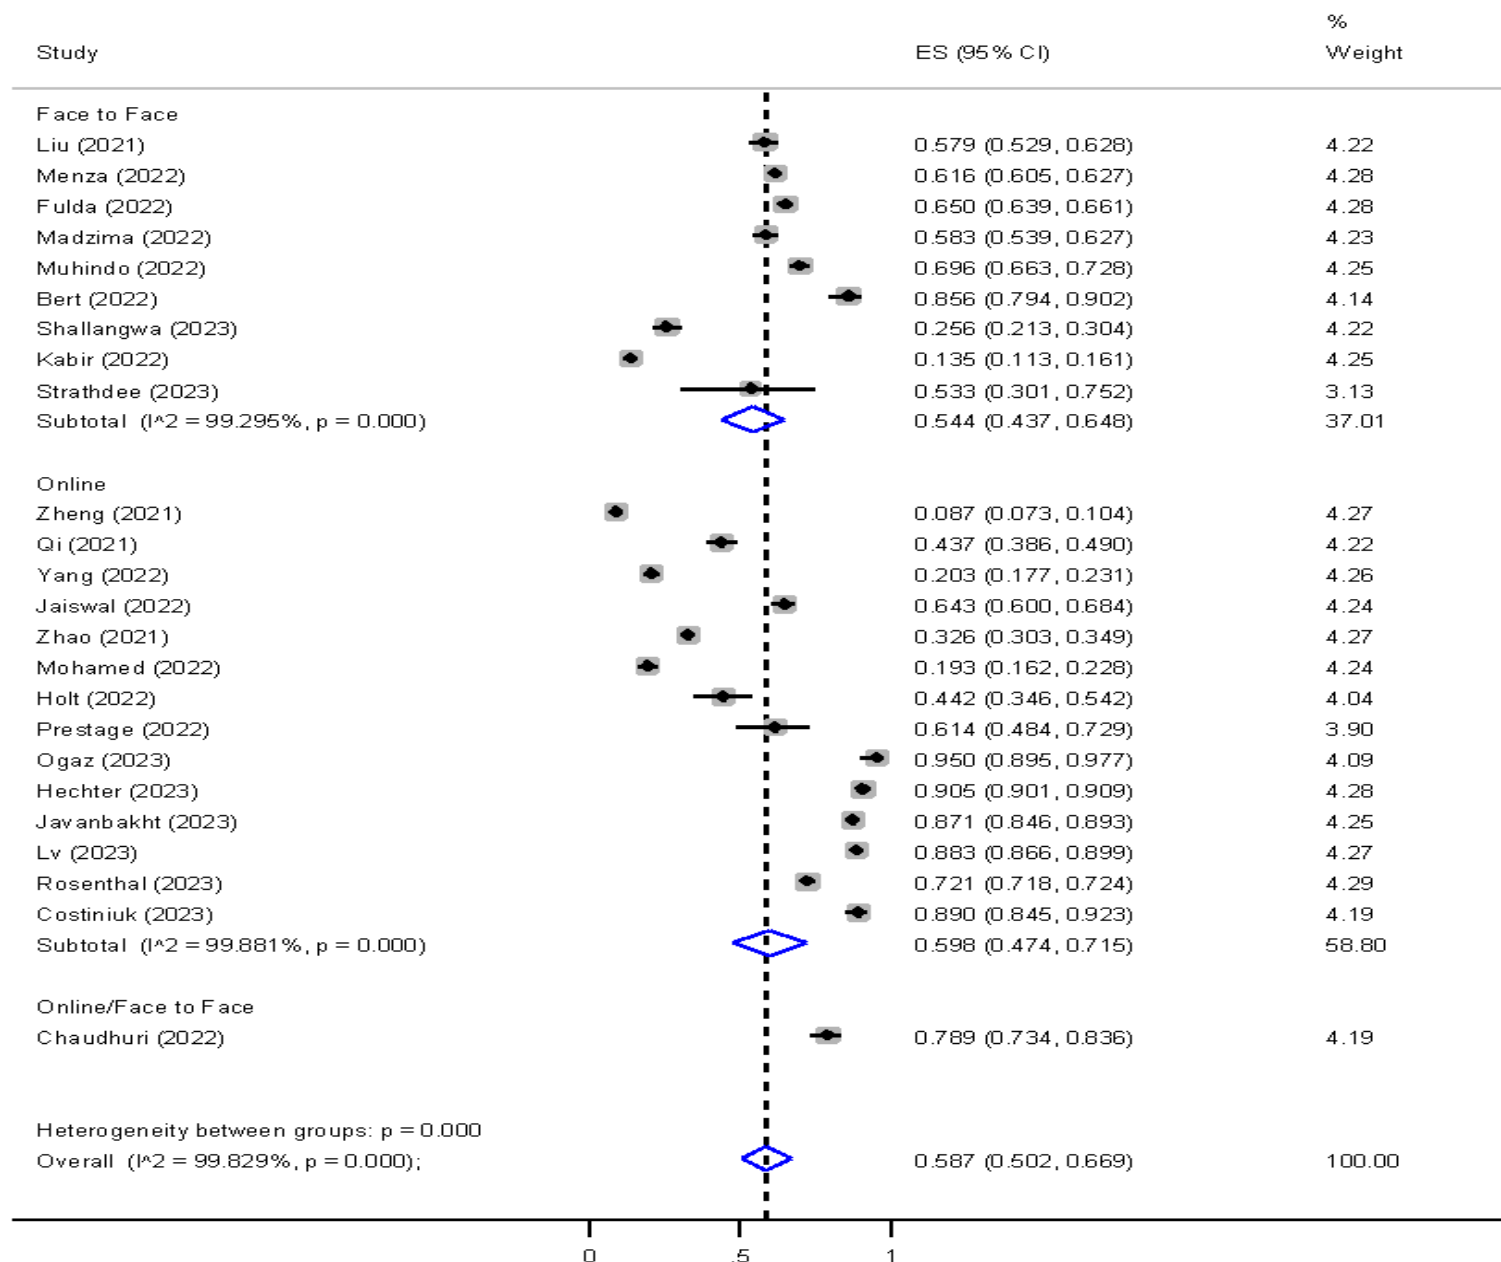

**Supplementary Figure 33: Forest plots of the results of random-effects model meta-analysis of the prevalence (%) of COVID-19 vaccine uptake among PLHIV according to the data collection method (n = 24 studies) pooled using inverse variance weights. Each black-colored solid square represents the effect size of each characteristic, while the ends of the adjoining horizontal lines represent lower (left) and upper (right) confidence intervals. The blue-colored hollow diamond at the bottom denotes the overall estimated effect size and the 95% CI. All statistics were based on a two-sided t-test. ES, Effect Size.**

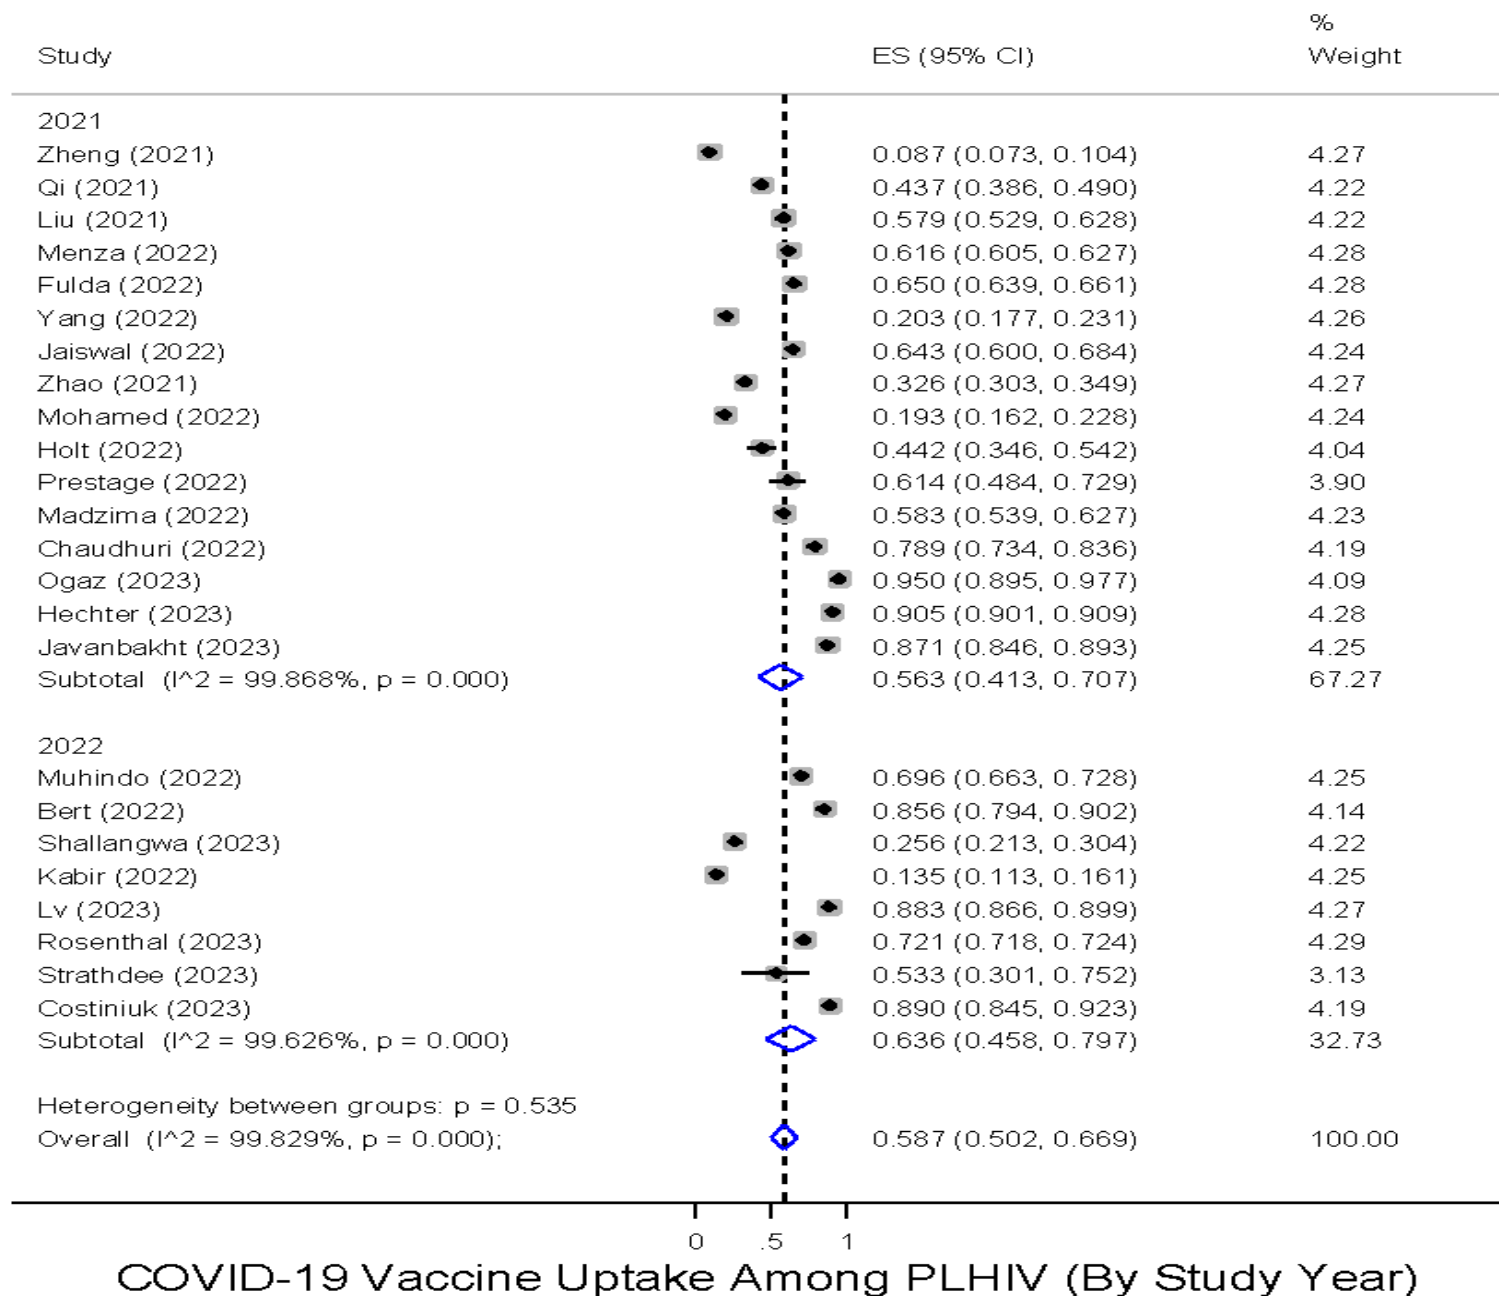

**Supplementary Figure 34: Forest plots of the results of random-effects model meta-analysis of the prevalence (%) of COVID-19 vaccine uptake among PLHIV according to the study year (n = 24 studies) pooled using inverse variance weights. Each black-colored solid square represents the effect size of each characteristic, while the ends of the adjoining horizontal lines represent lower (left) and upper (right) confidence intervals. The blue-colored hollow diamond at the bottom denotes the overall estimated effect size and the 95% CI. All statistics were based on a two-sided t-test. ES, Effect Size.**

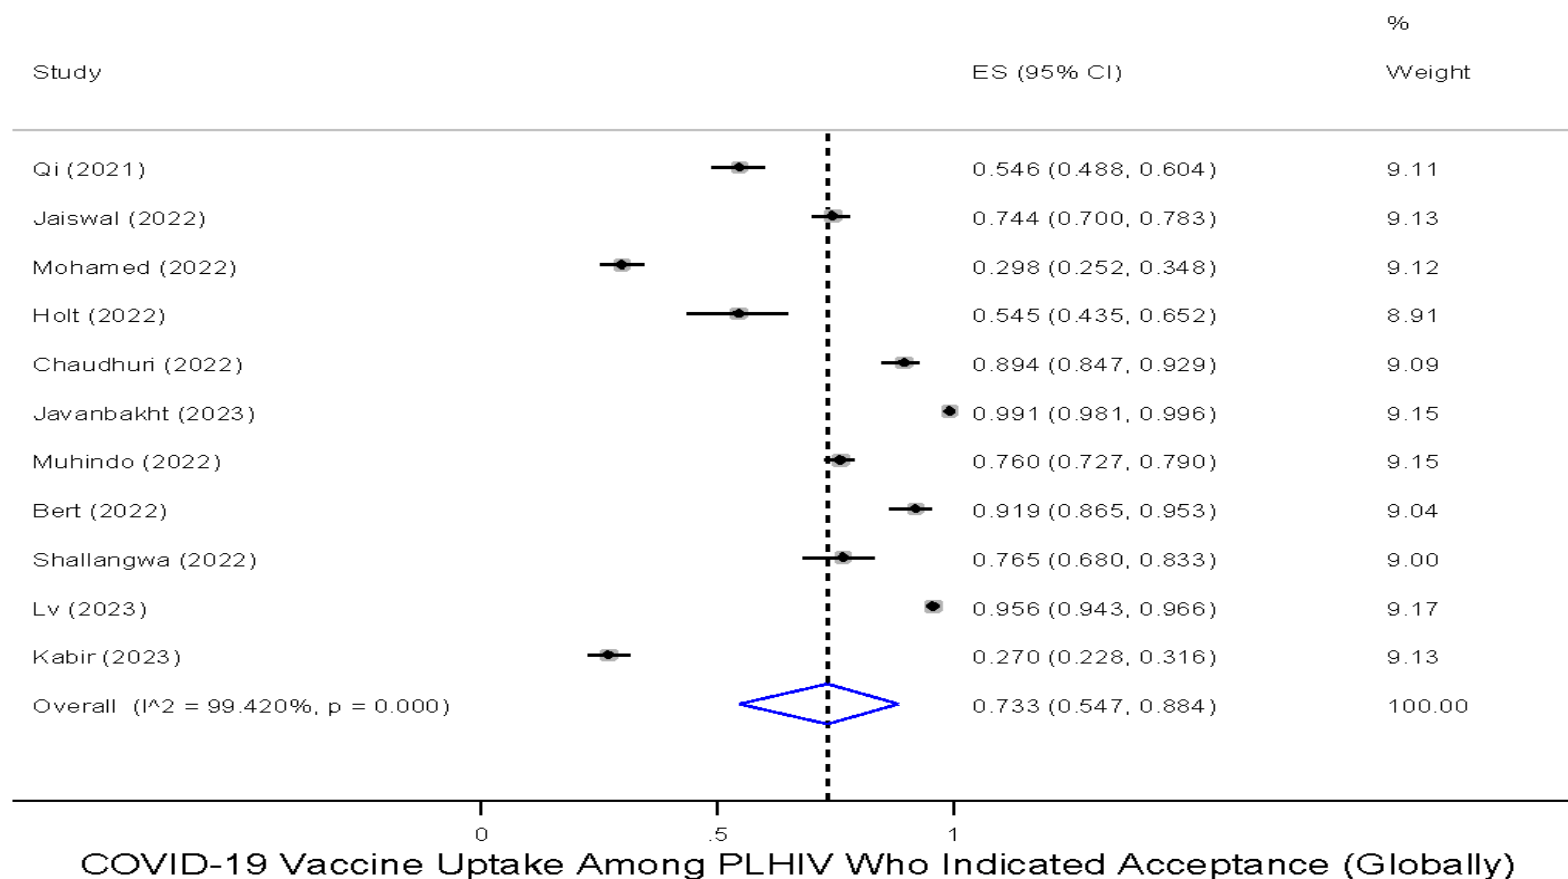

**Supplementary Figure 35: Forest plots of the results of random-effects model meta-analysis of the prevalence (%) of COVID-19 vaccine uptake among PLHIV who indicated acceptance globally (n = 11 studies) pooled using inverse variance weights. Each black-colored solid square represents the effect size of each characteristic, while the ends of the adjoining horizontal lines represent lower (left) and upper (right) confidence intervals. The blue-colored hollow diamond at the bottom denotes the overall estimated effect size and the 95% CI. All statistics were based on a two-sided t-test. ES, Effect Size.**

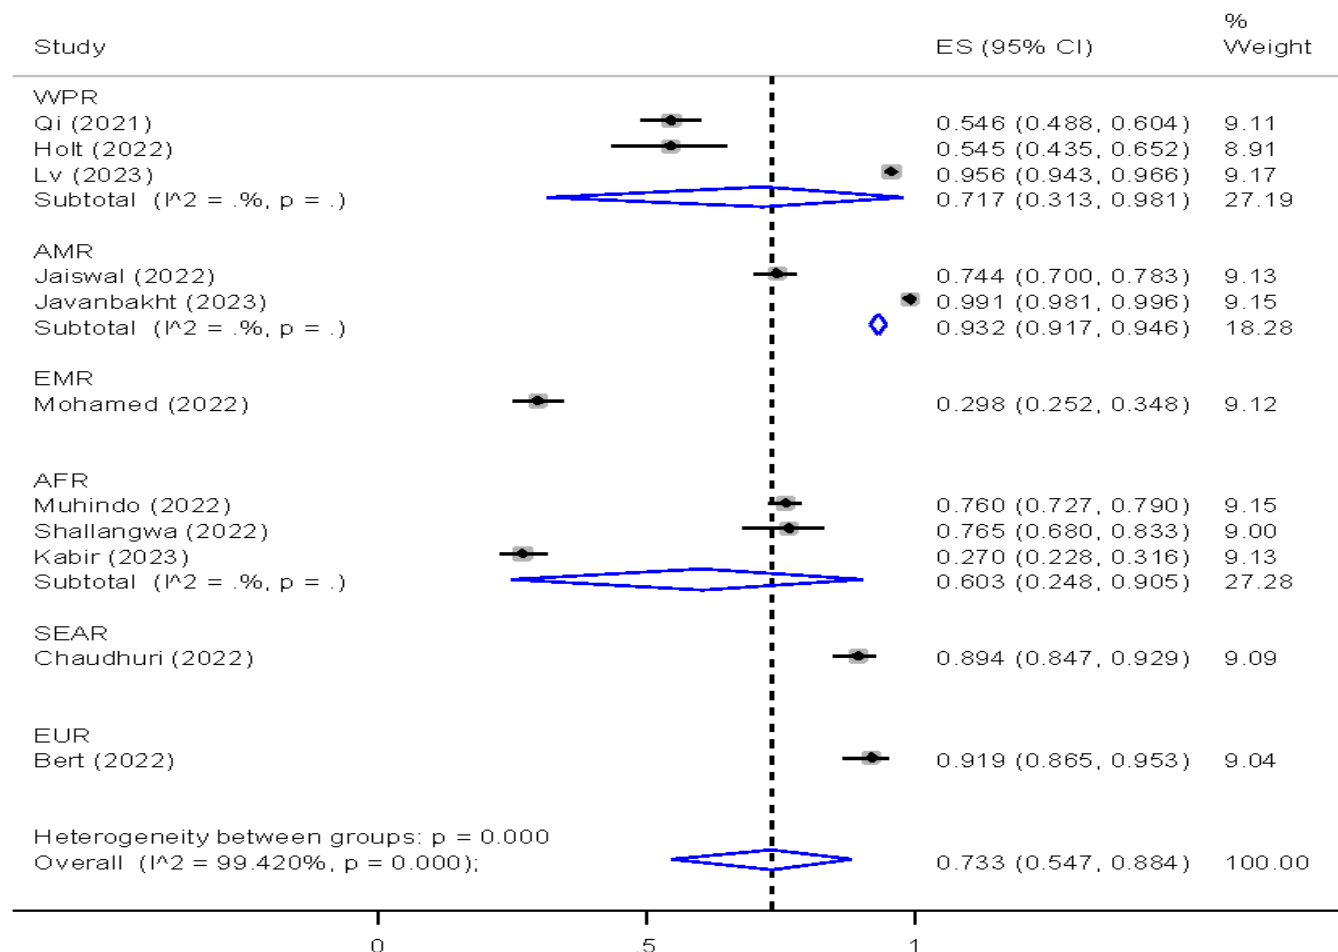

D-19 Vaccine uptake Among PLHIV Who Indicated Acceptance (By WHO Region)

**Supplementary Figure 36: Forest plots of the results of random-effects model meta-analysis of the prevalence (%) of COVID-19 vaccine uptake among PLHIV who indicated acceptance according to the WHO region (n = 11 studies) pooled using inverse variance weights. Each black-colored solid square represents the effect size of each characteristic, while the ends of the adjoining horizontal lines represent lower (left) and upper (right) confidence intervals. The blue-colored hollow diamond at the bottom denotes the overall estimated effect size and the 95% CI. All statistics were based on a two-sided t-test. ES, Effect Size.**

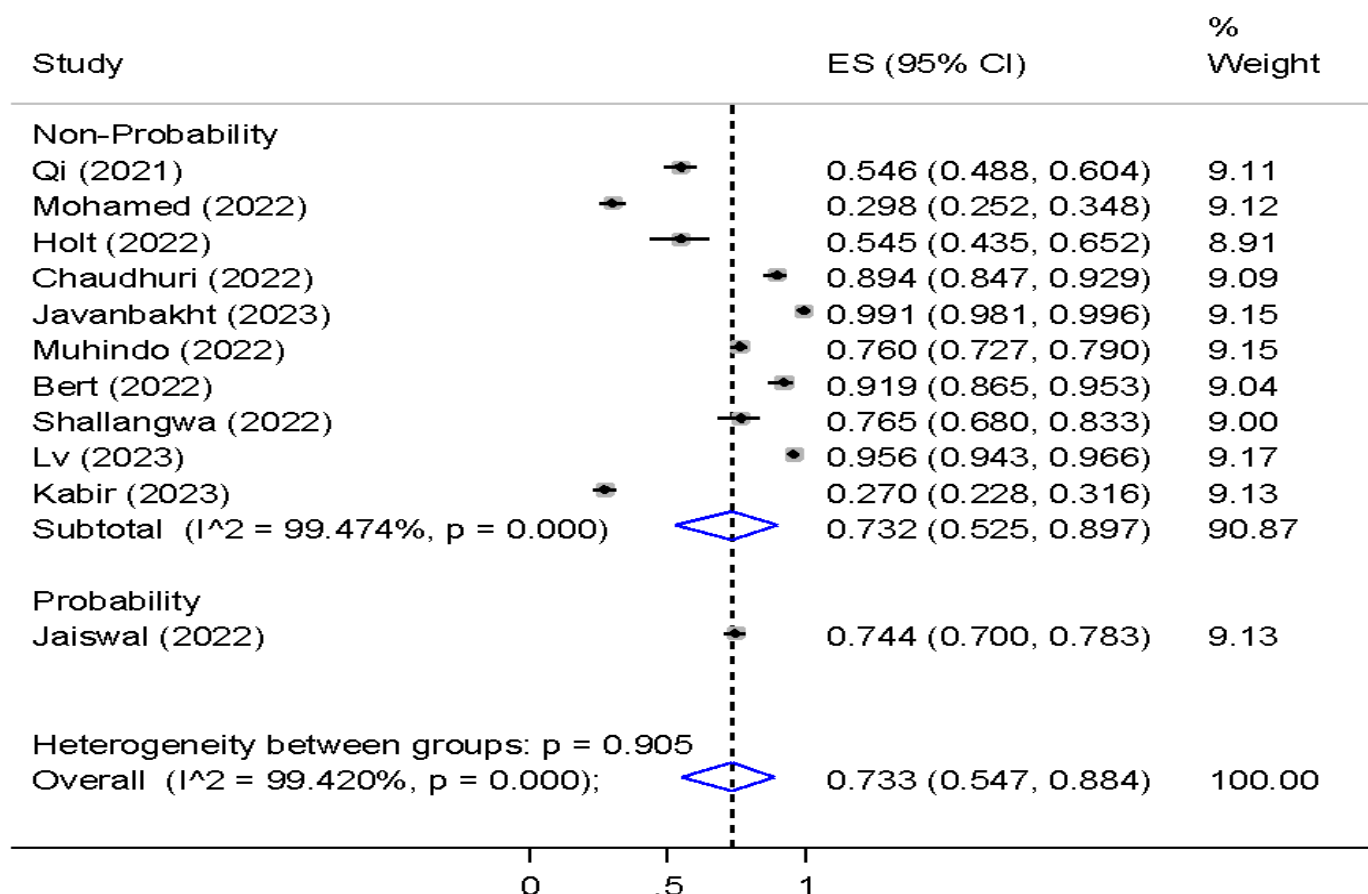

ID-19 Vaccine Uptake Among PLHIV Who Indicated Acceptance (By Sampling Method)

**Supplementary Figure 37: Forest plots of the results of random-effects model meta-analysis of the prevalence (%) of COVID-19 vaccine uptake among PLHIV who indicated acceptance according to the sampling method employed (n = 11 studies) pooled using inverse variance weights. Each black-colored solid square represents the effect size of each characteristic, while the ends of the adjoining horizontal lines represent lower (left) and upper (right) confidence intervals. The blue-colored hollow**

**diamond at the bottom denotes the overall estimated effect size and the 95% CI. All statistics were based on a two-sided t-test. ES, Effect Size.**

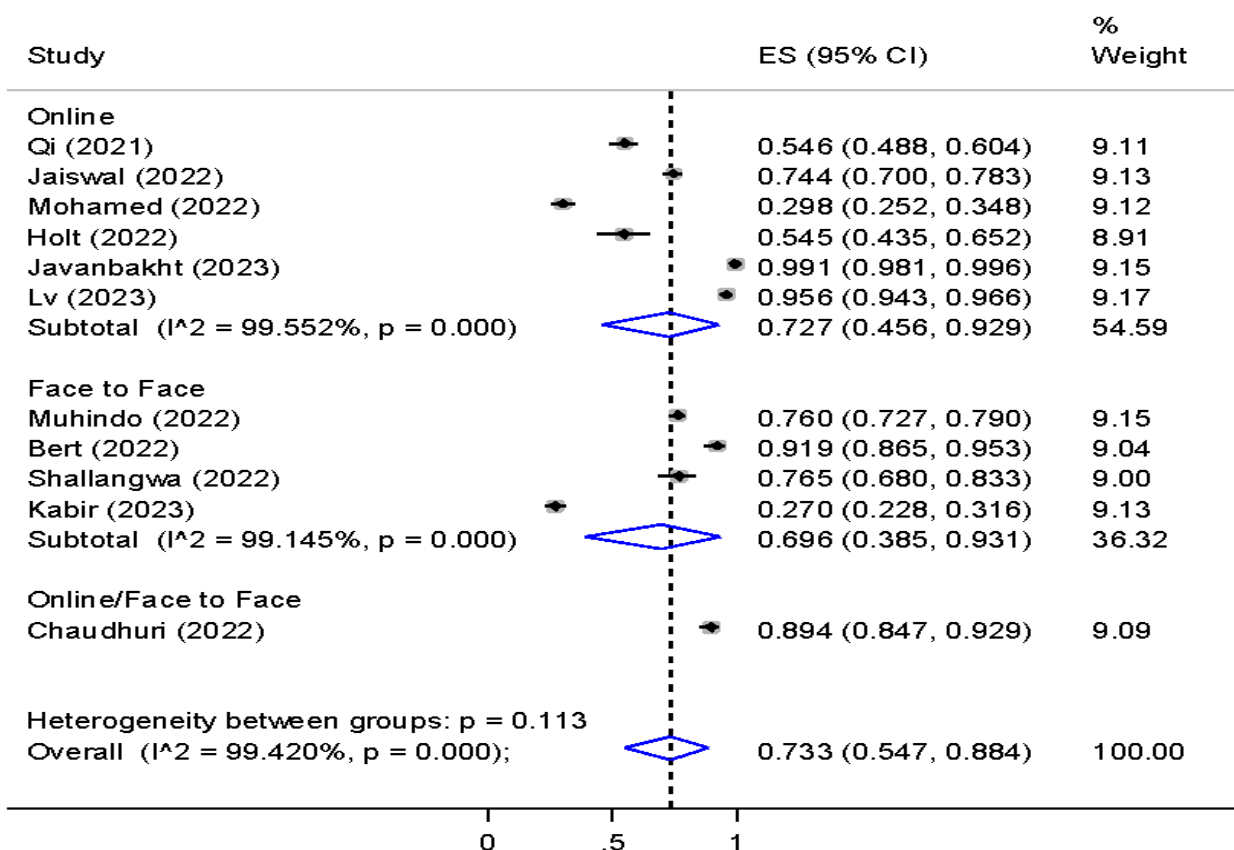

9 Vaccine uptake Among PLHIV Who Indicated Acceptance (By Data Collection Method)

**Supplementary Figure 38: Forest plots of the results of random-effects model meta-analysis of the prevalence (%) of COVID-19 vaccine uptake among PLHIV who indicated acceptance according to the data collection method (n = 11 studies) pooled using inverse variance weights. Each black-colored solid square represents the effect size of each characteristic, while the ends of the adjoining horizontal lines represent lower (left) and upper (right) confidence intervals. The blue-colored hollow diamond at the bottom denotes the overall estimated effect size and the 95% CI. All statistics were based on a two-sided t-test. ES, Effect Size.**



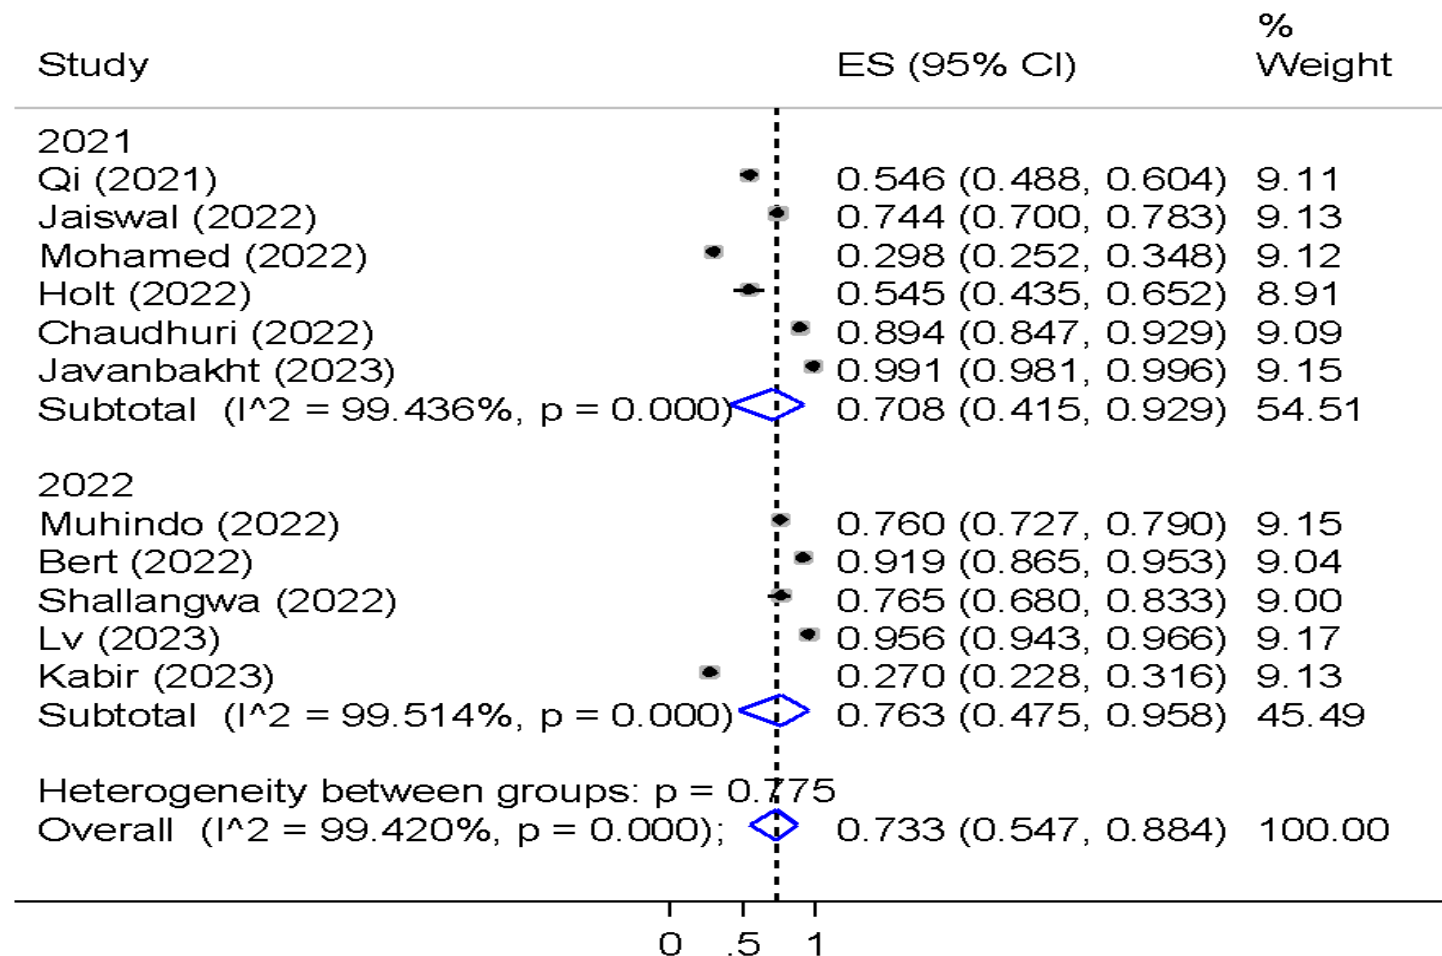

COVID-19 Vaccine Uptake Among PLHIV Who Indicated Acceptance (By Study Year)

**Supplementary Figure 39: Forest plots of the results of random-effects model meta-analysis of the prevalence (%) of COVID-19 vaccine uptake among PLHIV who indicated acceptance according to the study year (n = 11 studies) pooled using inverse variance weights. Each black-colored solid square represents the effect size of each characteristic, while the ends of the**

adjoining horizontal lines represent lower (left) and upper (right) confidence intervals. The blue-colored hollow diamond at the bottom denotes the overall estimated effect size and the 95% CI. All statistics were based on a two-sided t-test. ES, Effect Size.

## SECTION D

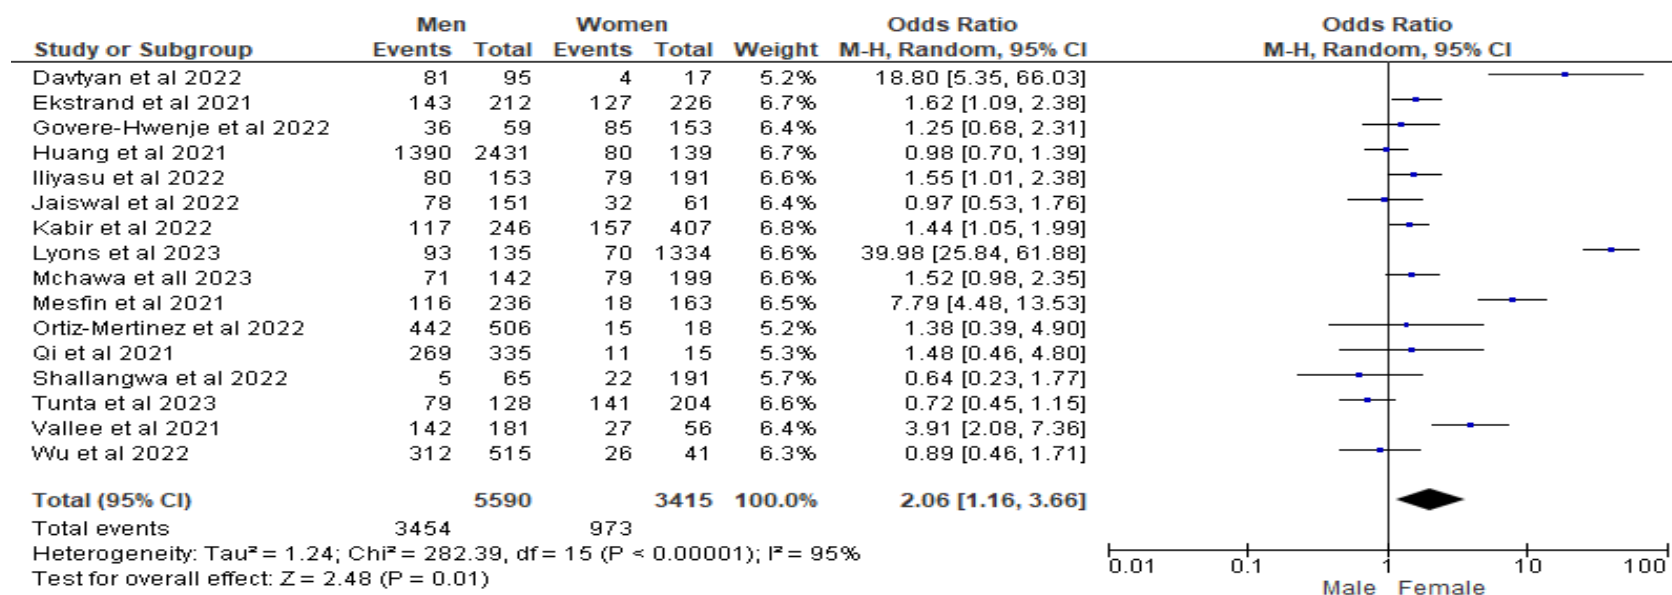

**Supplementary Figure 40: Forest plots of random-effects model meta-analysis of gender as a determinant of COVID-19 vaccine acceptance pooled using the Mantel-Haenszel (M-H) method (n = 16 studies; N = 9,005 participants). Each blue-colored solid square represents the effect size (odds ratio, OR) of each characteristic, while the ends of the adjoining horizontal lines represent**

lower (left) and upper (right) confidence intervals. The isolated black-colored solid rhombus at the bottom denotes the overall estimated effect size and the 95% CI. All statistics were based on a two-sided t-test. df: degree of freedom.

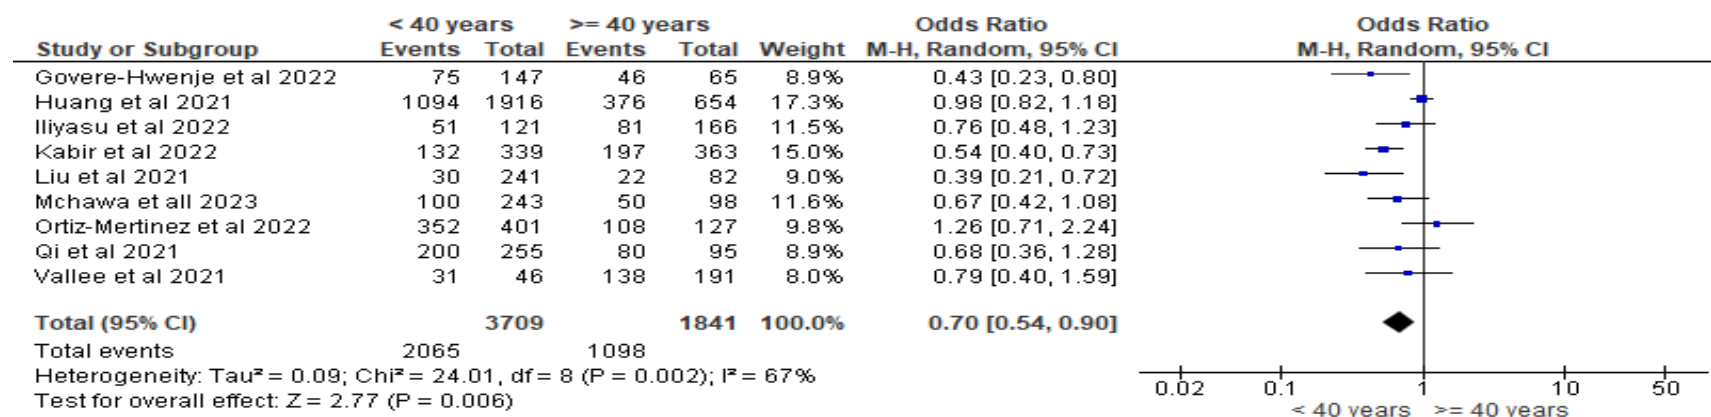

**Supplementary Figure 41:** Forest plots of random-effects model meta-analysis of age as a determinant of COVID-19 vaccine acceptance pooled using the Mantel-Haenszel (M-H) method ( $n = 9$  studies;  $N = 5,550$  participants). Each blue-colored solid square represents the effect size (odds ratio, OR) of each characteristic, while the ends of the adjoining horizontal lines represent lower (left) and upper (right) confidence intervals. The isolated black-colored solid rhombus at the bottom denotes the overall estimated effect size and the 95% CI. All statistics were based on a two-sided t-test. df: degree of freedom.

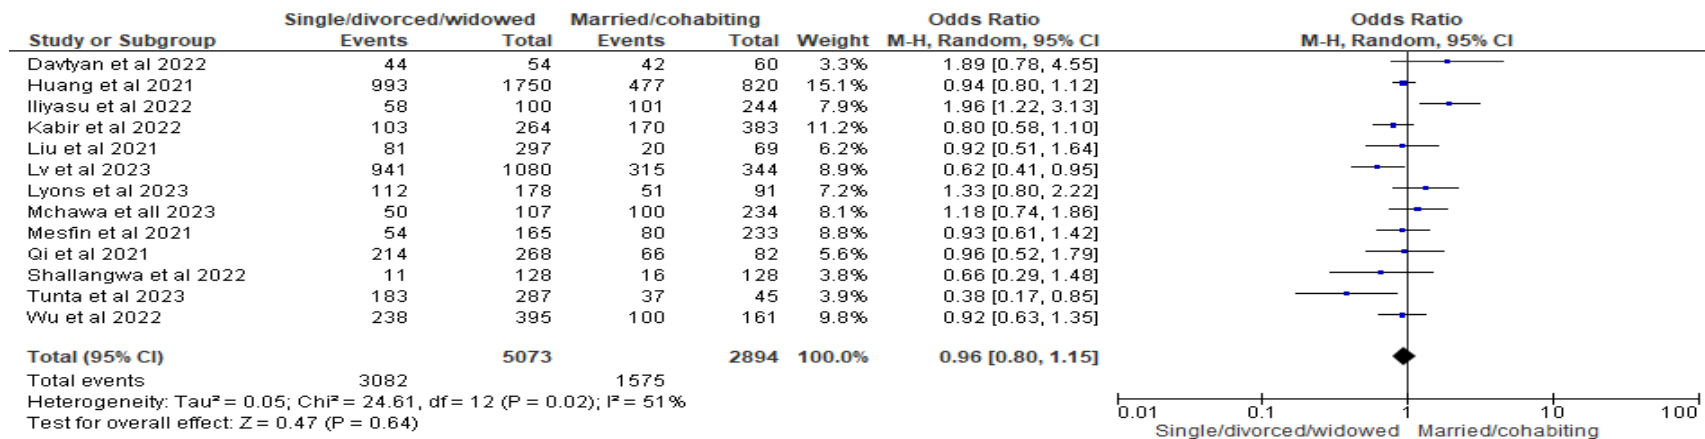

**Supplementary Figure 42: Forest plots of random-effects model meta-analysis of marital status as a determinant of COVID-19 vaccine acceptance pooled using the Mantel-Haenszel (M-H) method (n = 13 studies; N = 7,967 participants).** Each blue-colored solid square represents the effect size (odds ratio, OR) of each characteristic, while the ends of the adjoining horizontal lines represent lower (left) and upper (right) confidence intervals. The isolated black-colored solid rhombus at the bottom denotes the overall estimated effect size and the 95% CI. All statistics were based on a two-sided t-test. df: degree of freedom.

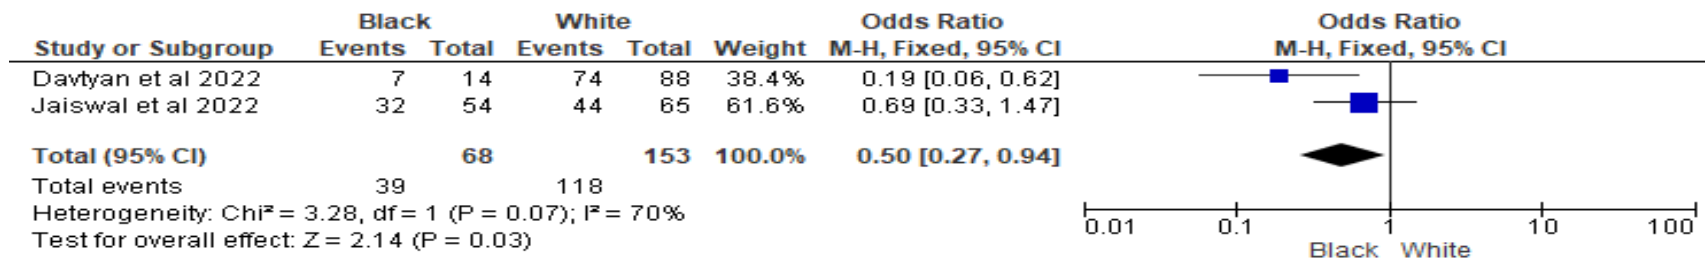

**Supplementary Figure 43: Forest plots of fixed-effects model meta-analysis of race (Black vs. White) as a determinant of COVID-19 vaccine acceptance pooled using the Mantel-Haenszel (M-H) method (n = 2 studies; N = 221 participants).** Each blue-colored solid square represents the effect size (odds ratio, OR) of each characteristic, while the ends of the adjoining horizontal lines represent lower (left) and upper (right) confidence intervals. The isolated black-colored solid rhombus at the bottom denotes the overall estimated effect size and the 95% CI. All statistics were based on a two-sided t-test. df: degree of freedom.

lines represent lower (left) and upper (right) confidence intervals. The isolated black-colored solid rhombus at the bottom denotes the overall estimated effect size and the 95% CI. All statistics were based on a two-sided t-test. df: degree of freedom.

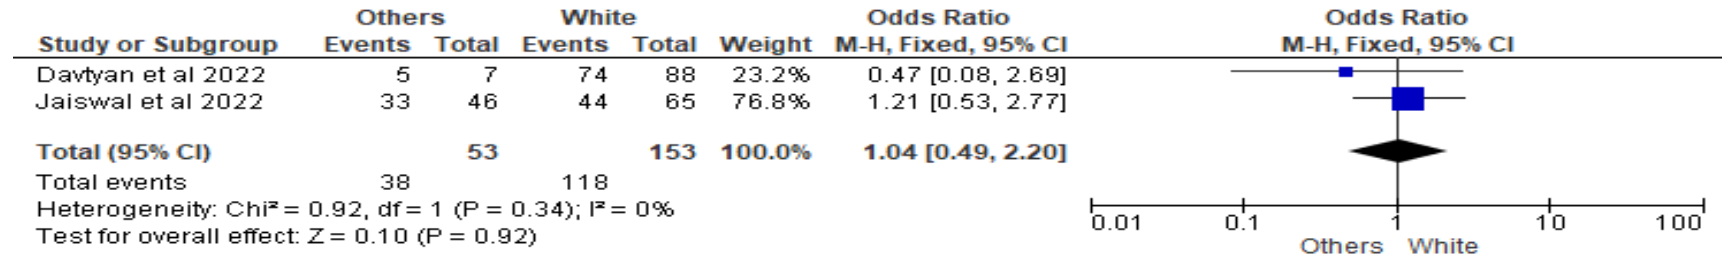

**Supplementary Figure 44: Forest plots of fixed-effects model meta-analysis of race (Others [Latinx/Hispanic/Mixed race] vs. White people) as a determinant of COVID-19 vaccine acceptance pooled using the Mantel-Haenszel (M-H) method (n = 2 studies; N = 206 participants).** Each blue-colored solid square represents the effect size (odds ratio, OR) of each characteristic, while the ends of the adjoining horizontal lines represent lower (left) and upper (right) confidence intervals. The isolated black-colored solid rhombus at the bottom denotes the overall estimated effect size and the 95% CI. All statistics were based on a two-sided t-test. df: degree of freedom.

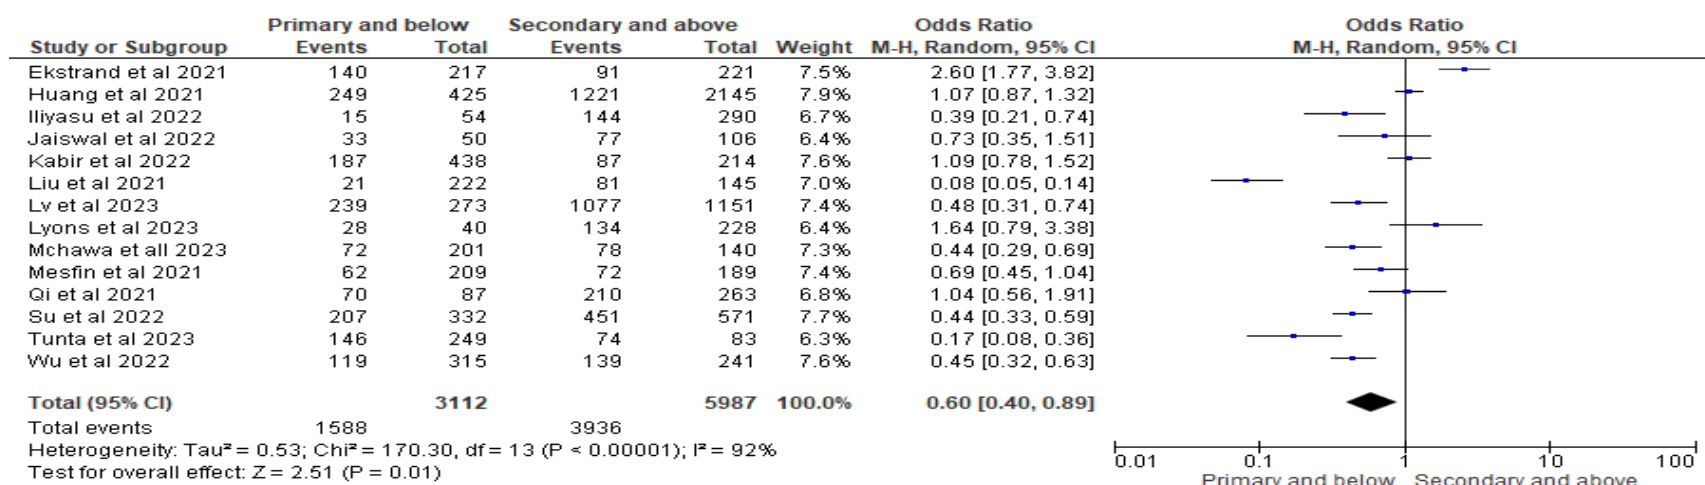

**Supplementary Figure 45: Forest plots of random-effects model meta-analysis of educational level as a determinant of COVID-19 vaccine acceptance pooled using the Mantel-Haenszel (M-H) method (n = 14 studies; N = 9,099 participants). Each blue-colored solid square represents the effect size (odds ratio, OR) of each characteristic, while the ends of the adjoining horizontal lines represent lower (left) and upper (right) confidence intervals. The isolated black-colored solid rhombus at the bottom denotes the overall estimated effect size and the 95% CI. All statistics were based on a two-sided t-test. df: degree of freedom.**

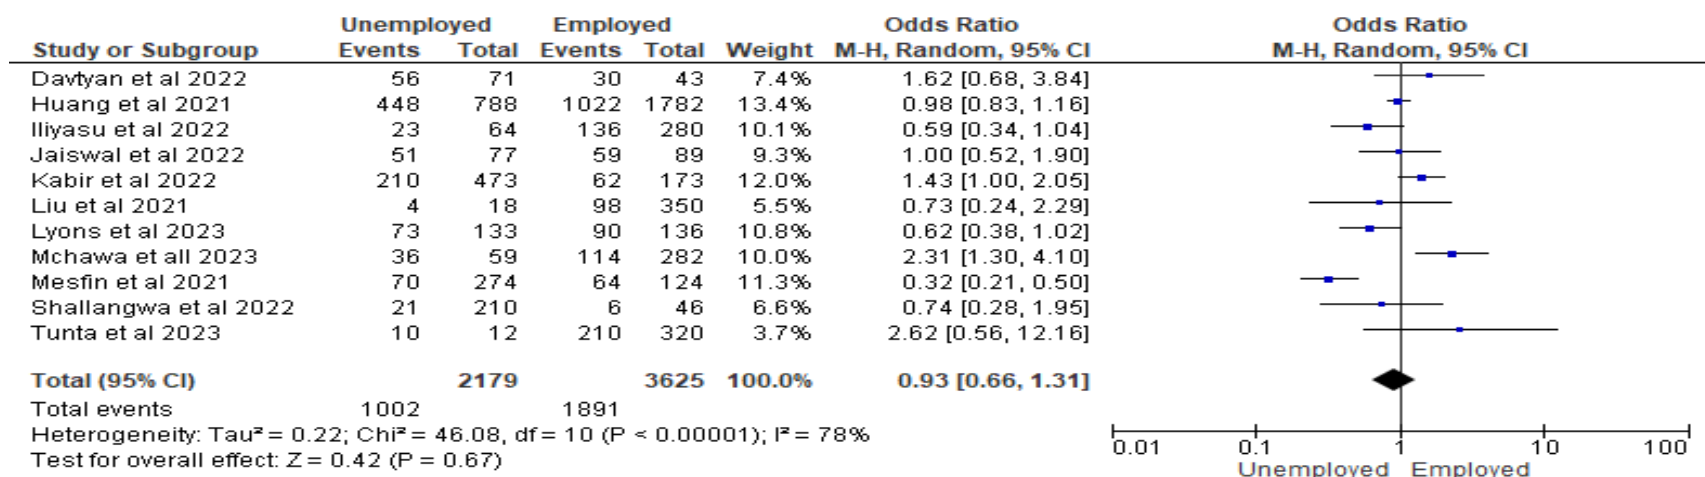

**Supplementary Figure 46: Forest plots of random-effects model meta-analysis of employment status as a determinant of COVID-19 vaccine acceptance pooled using the Mantel-Haenszel (M-H) method (n = 11 studies; N = 5,804 participants). Each blue-colored solid square represents the effect size (odds ratio, OR) of each characteristic, while the ends of the adjoining horizontal lines represent lower (left) and upper (right) confidence intervals. The isolated black-colored solid rhombus at the bottom denotes the overall estimated effect size and the 95% CI. All statistics were based on a two-sided t-test. df: degree of freedom.**

1. Income class

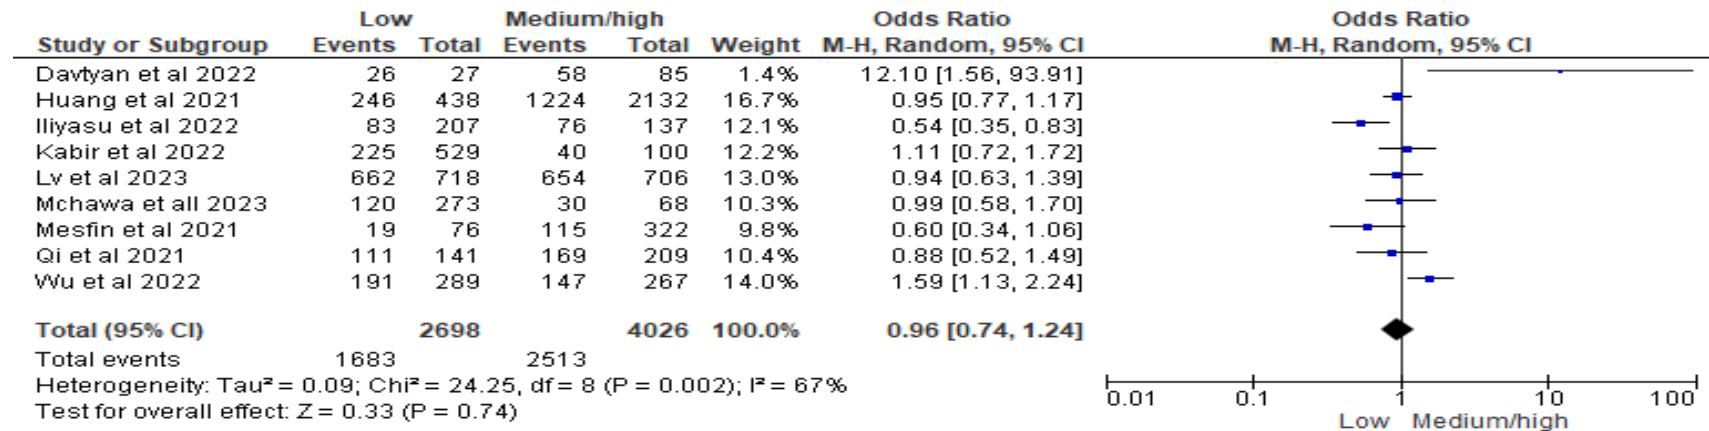

**Supplementary Figure 47: Forest plots of random-effects model meta-analysis of income class as a determinant of COVID-19 vaccine acceptance pooled using the Mantel-Haenszel (M-H) method (n = 9 studies; N = 6,724 participants). Each blue-colored solid square represents the effect size (odds ratio, OR) of each characteristic, while the ends of the adjoining horizontal lines represent lower (left) and upper (right) confidence intervals. The isolated black-colored solid rhombus at the bottom denotes the overall estimated effect size and the 95% CI. All statistics were based on a two-sided t-test. df: degree of freedom.**

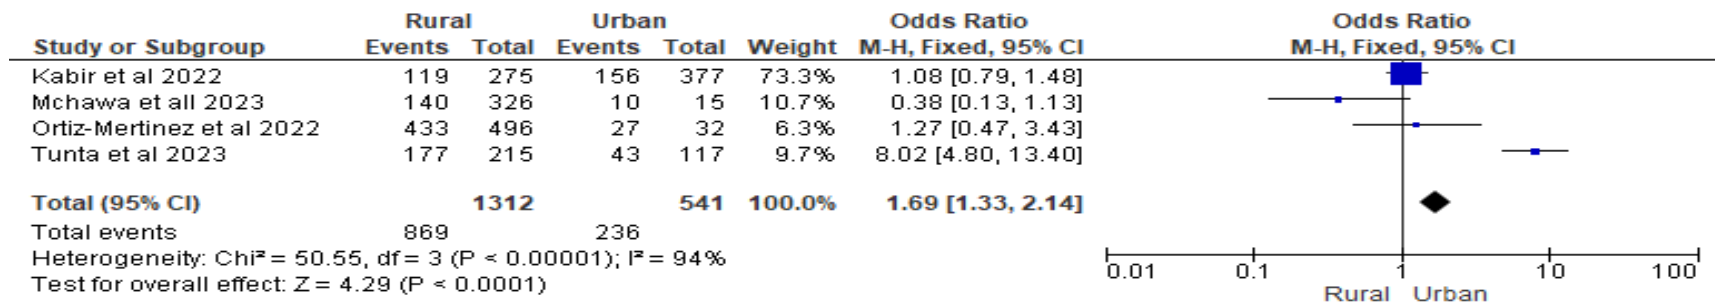

**Supplementary Figure 48: Forest plots of fixed-effects model meta-analysis of residence as a determinant of COVID-19 vaccine acceptance pooled using the Mantel-Haenszel (M-H) method (n = 4 studies; N = 1,853 participants).** Each blue-colored solid square represents the effect size (odds ratio, OR) of each characteristic, while the ends of the adjoining horizontal lines represent lower (left) and upper (right) confidence intervals. The isolated black-colored solid rhombus at the bottom denotes the overall estimated effect size and the 95% CI. All statistics were based on a two-sided t-test. df: degree of freedom.

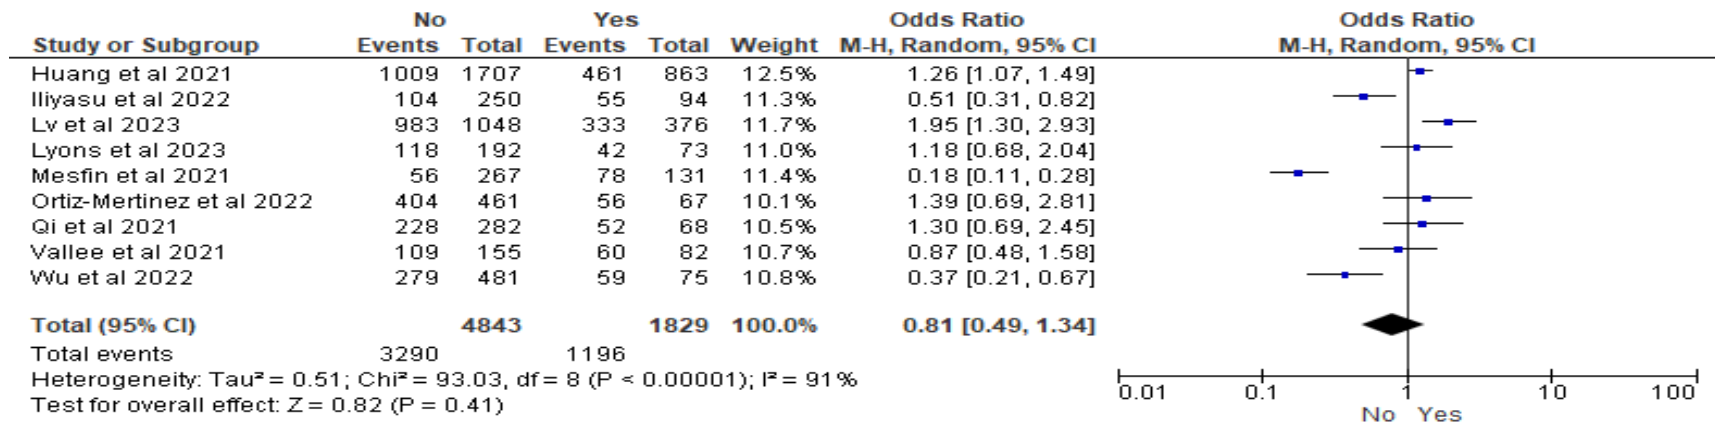

**Supplementary Figure 49: Forest plots of random-effects model meta-analysis of comorbidity as a determinant of COVID-19 vaccine acceptance pooled using the Mantel-Haenszel (M-H) method (n = 9 studies; N = 6,672 participants). Each blue-colored solid square represents the effect size (odds ratio, OR) of each characteristic, while the ends of the adjoining horizontal lines represent lower (left) and upper (right) confidence intervals. The isolated black-colored solid rhombus at the bottom denotes the overall estimated effect size and the 95% CI. All statistics were based on a two-sided t-test. df: degree of freedom.**

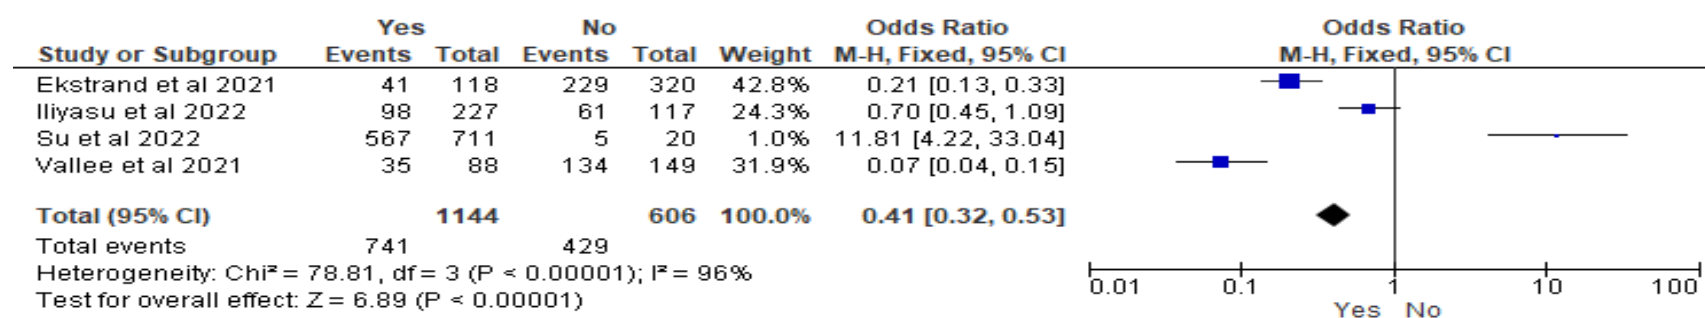

**Supplementary Figure 50: Forest plots of fixed-effects model meta-analysis of concern about vaccine safety as a determinant of COVID-19 vaccine acceptance pooled using the Mantel-Haenszel (M-H) method (n = 4 studies; N = 1750 participants). Each blue-colored solid square represents the effect size (odds ratio, OR) of each characteristic, while the ends of the adjoining horizontal lines represent lower (left) and upper (right) confidence intervals. The isolated black-colored solid rhombus at the bottom denotes the overall estimated effect size and the 95% CI. All statistics were based on a two-sided t-test. df: degree of freedom.**

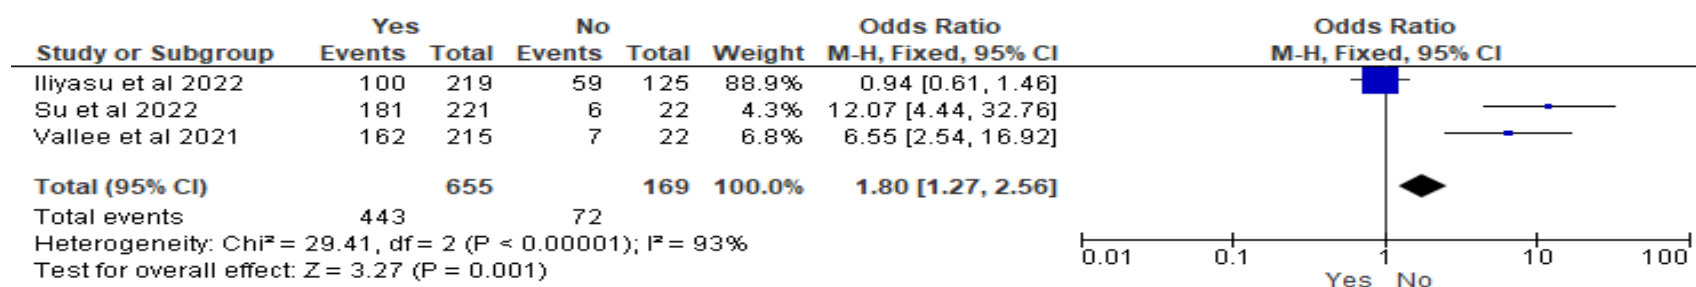

**Supplementary Figure 51: Forest plots of fixed-effects model meta-analysis of perceived vaccine effectiveness as a determinant of COVID-19 vaccine acceptance pooled using the Mantel-Haenszel (M-H) method (n = 3 studies; N = 824 participants).** Each blue-colored solid square represents the effect size (odds ratio, OR) of each characteristic, while the ends of the adjoining horizontal lines represent lower (left) and upper (right) confidence intervals. The isolated black-colored solid rhombus at the bottom denotes the overall estimated effect size and the 95% CI. All statistics were based on a two-sided t-test. df: degree of freedom.

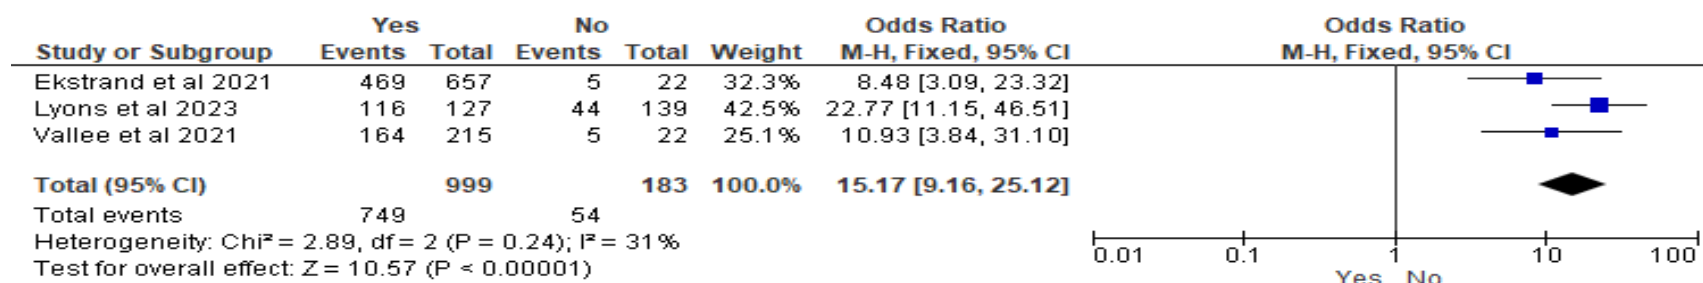

**Supplementary Figure 52: Forest plots of fixed-effects model meta-analysis of vaccine trust as a determinant of COVID-19 vaccine acceptance pooled using the Mantel-Haenszel (M-H) method (n = 3 studies; N = 1,182 participants).** Each blue-colored solid square represents the effect size (odds ratio, OR) of each characteristic, while the ends of the adjoining horizontal lines represent lower (left) and upper (right) confidence intervals. The isolated black-colored solid rhombus at the bottom denotes the overall estimated effect size and the 95% CI. All statistics were based on a two-sided t-test. df: degree of freedom.

## 2. Perceived susceptibility

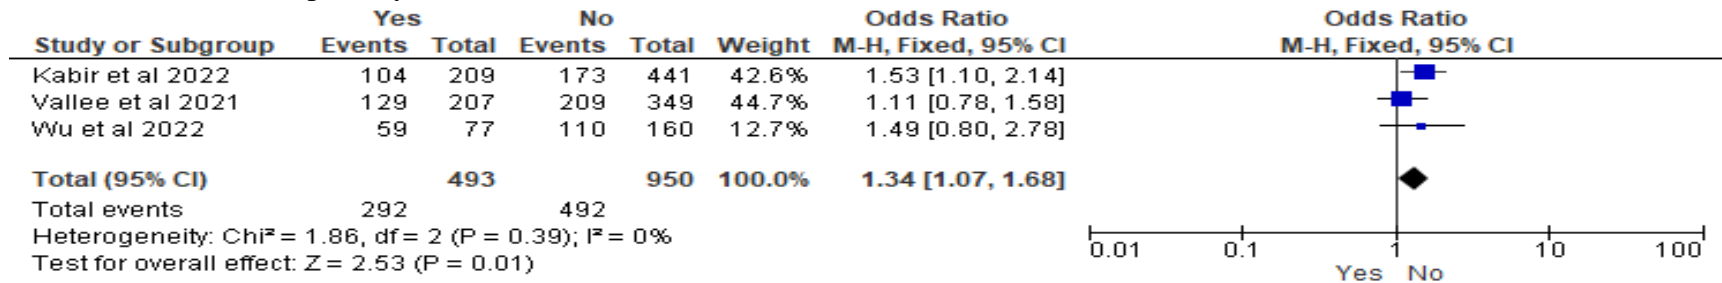

**Supplementary Figure 53: Forest plots of fixed-effects model meta-analysis of perceived susceptibility to SARS-Cov-2 as a determinant of COVID-19 vaccine acceptance pooled using the Mantel-Haenszel (M-H) method (n = 3 studies; N = 1443 participants). Each blue-colored solid square represents the effect size (odds ratio, OR) of each characteristic, while the ends of the adjoining horizontal lines represent lower (left) and upper (right) confidence intervals. The isolated black-colored solid rhombus at the bottom denotes the overall estimated effect size and the 95% CI. All statistics were based on a two-sided t-test. df: degree of freedom.**

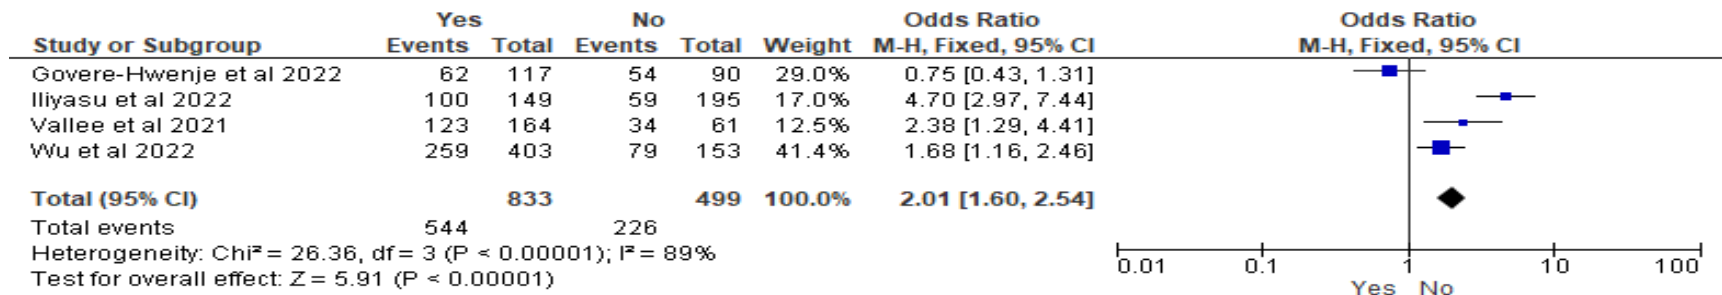

**Supplementary Figure 54: Forest plots of random-effects model meta-analysis of fear of SARS-Cov-2 effect in PLHIV as a determinant of COVID-19 vaccine acceptance pooled using the Mantel-Haenszel (M-H) method (n = 4 studies; N = 1332 participants). Each blue-colored solid square represents the effect size (odds ratio, OR) of each characteristic, while the ends of**

the adjoining horizontal lines represent lower (left) and upper (right) confidence intervals. The isolated black-colored solid rhombus at the bottom denotes the overall estimated effect size and the 95% CI. All statistics were based on a two-sided t-test. df: degree of freedom.

### 3. Receipt of influenza vaccination

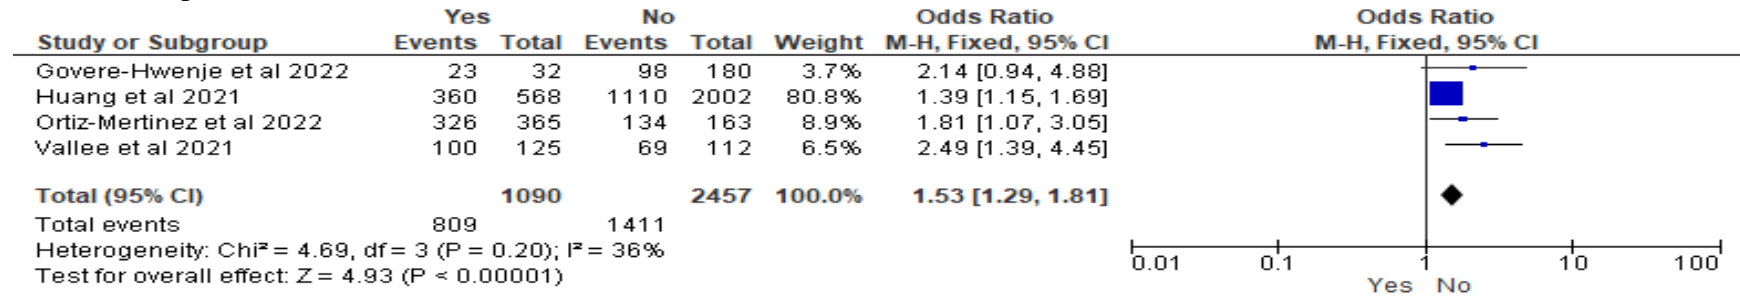

**Supplementary Figure 55: Forest plots of random-effects model meta-analysis of recent influenza vaccination as a determinant of COVID-19 vaccine acceptance pooled using the Mantel-Haenszel (M-H) method (n = 4 studies; N = 3,547 participants).** Each blue-colored solid square represents the effect size (odds ratio, OR) of each characteristic, while the ends of the adjoining horizontal lines represent lower (left) and upper (right) confidence intervals. The isolated black-colored solid rhombus at the bottom denotes the overall estimated effect size and the 95% CI. All statistics were based on a two-sided t-test. df: degree of freedom.

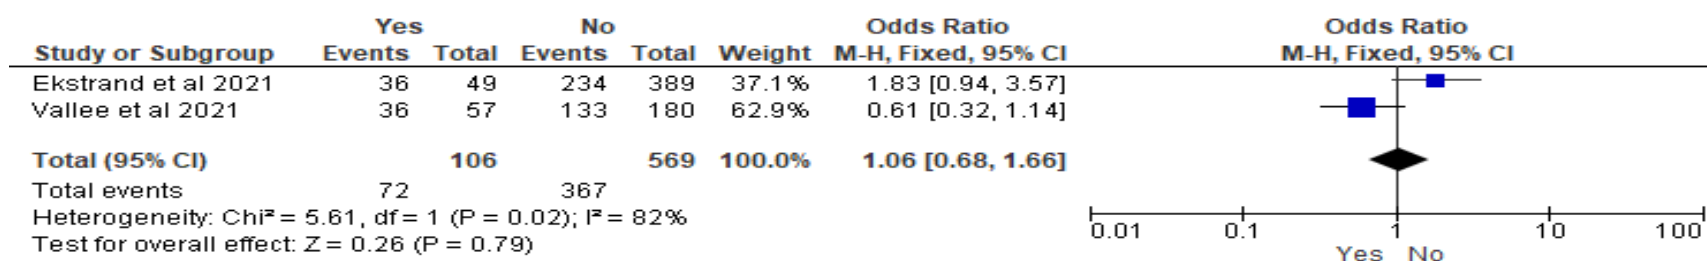

**Supplementary Figure 56: Forest plots of random-effects model meta-analysis of knowing someone who died of COVID-19 as a determinant of COVID-19 vaccine acceptance pooled using the Mantel-Haenszel (M-H) method (n = 2 studies; N = 675 participants). Each blue-colored solid square represents the effect size (odds ratio, OR) of each characteristic, while the ends of the adjoining horizontal lines represent lower (left) and upper (right) confidence intervals. The isolated black-colored solid rhombus at the bottom denotes the overall estimated effect size and the 95% CI. All statistics were based on a two-sided t-test. df: degree of freedom.**

## SECTION E

### Results of the meta-analysis of the determinants of COVID-19 vaccine uptake in PLHIV

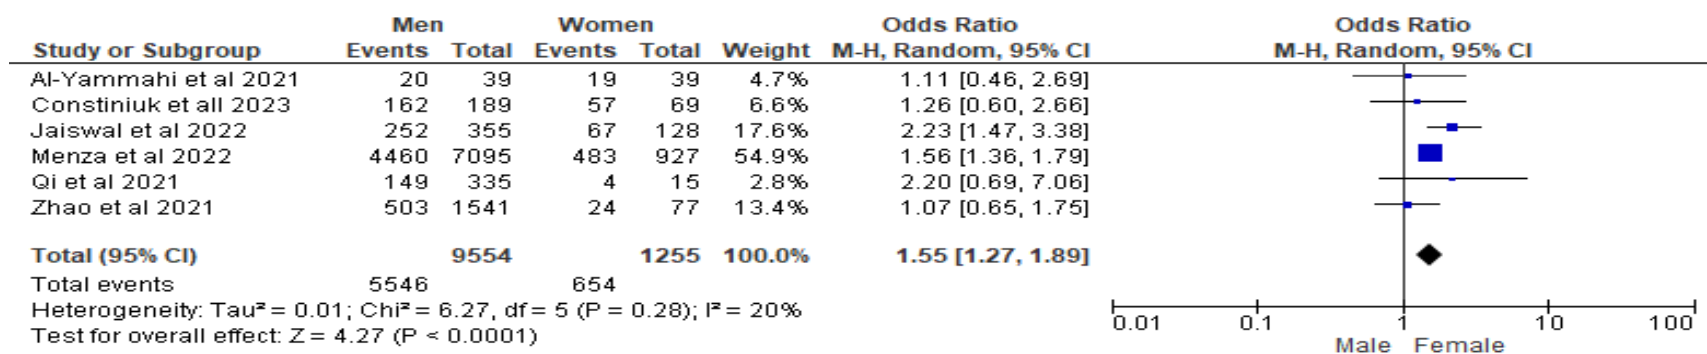

**Supplementary Figure 57: Forest plots of random-effects model meta-analysis of gender as a determinant of COVID-19 vaccine uptake pooled using the Mantel-Haenszel (M-H) method (n = 6 studies; N = 10,809 participants). Each blue-colored solid square**

represents the effect size (odds ratio, OR) of each characteristic, while the ends of the adjoining horizontal lines represent lower (left) and upper (right) confidence intervals. The isolated black-colored solid rhombus at the bottom denotes the overall estimated effect size and the 95% CI. All statistics were based on a two-sided t-test. df: degree of freedom.

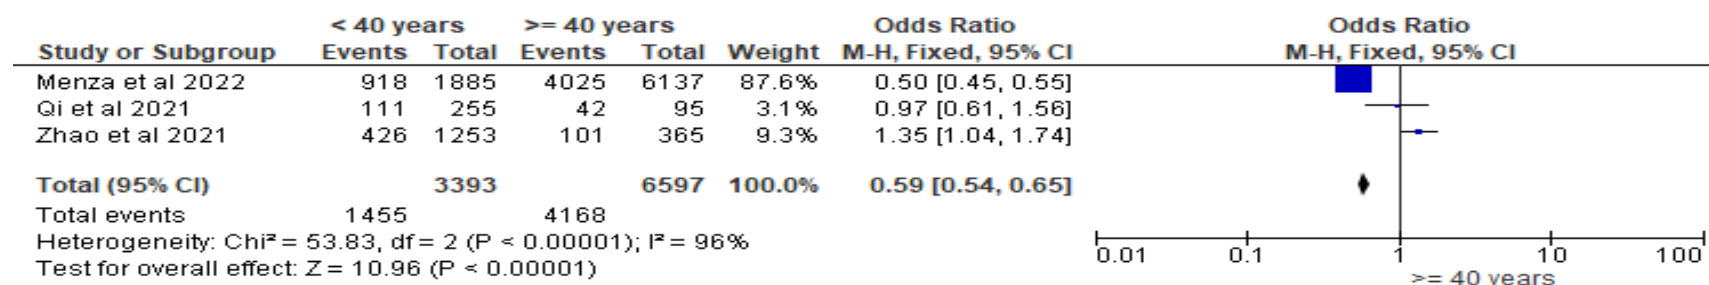

Supplementary Figure 58: Forest plots of fixed-effects model meta-analysis of age as a determinant of COVID-19 vaccine uptake pooled using the Mantel-Haenszel (M-H) method (n = 3 studies; N = 9,990 participants). Each blue-colored solid square represents the effect size (odds ratio, OR) of each characteristic, while the ends of the adjoining horizontal lines represent lower (left) and upper (right) confidence intervals. The isolated black-colored solid rhombus at the bottom denotes the overall estimated effect size and the 95% CI. All statistics were based on a two-sided t-test. df: degree of freedom.

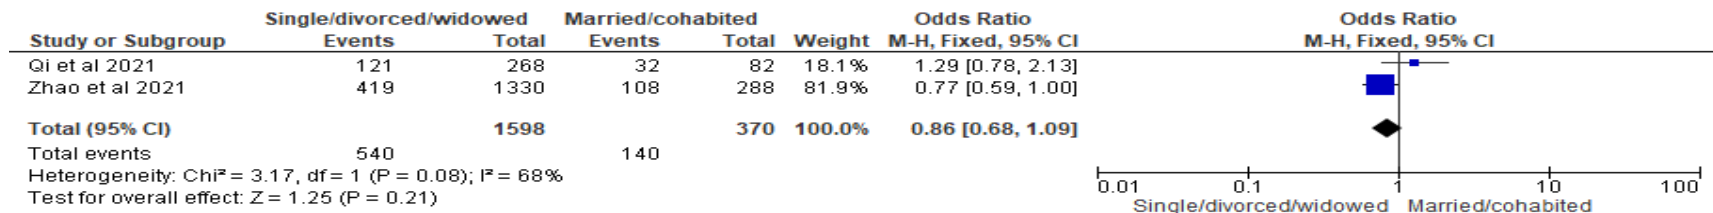

**Supplementary Figure 59: Forest plots of fixed-effects model meta-analysis of marital status as a determinant of COVID-19 vaccine uptake pooled using the Mantel-Haenszel (M-H) method (n = 2 studies; N = 1,968 participants).** Each blue-colored solid square represents the effect size (odds ratio, OR) of each characteristic, while the ends of the adjoining horizontal lines represent lower (left) and upper (right) confidence intervals. The isolated black-colored solid rhombus at the bottom denotes the overall estimated effect size and the 95% CI. All statistics were based on a two-sided t-test. df: degree of freedom.

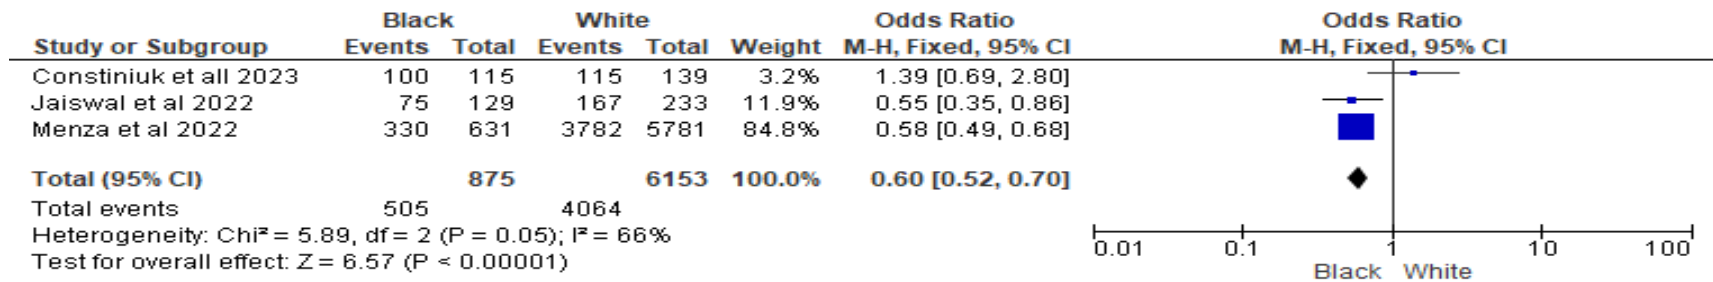

**Supplementary Figure 60: Forest plots of fixed-effects model meta-analysis of race (Black vs. White) as a determinant of COVID-19 vaccine uptake pooled using the Mantel-Haenszel (M-H) method (n = 3 studies; N = 7,028 participants).** Each blue-colored solid square represents the effect size (odds ratio, OR) of each characteristic, while the ends of the adjoining horizontal lines represent lower (left) and upper (right) confidence intervals. The isolated black-colored solid rhombus at the bottom denotes the overall estimated effect size and the 95% CI. All statistics were based on a two-sided t-test. df: degree of freedom.

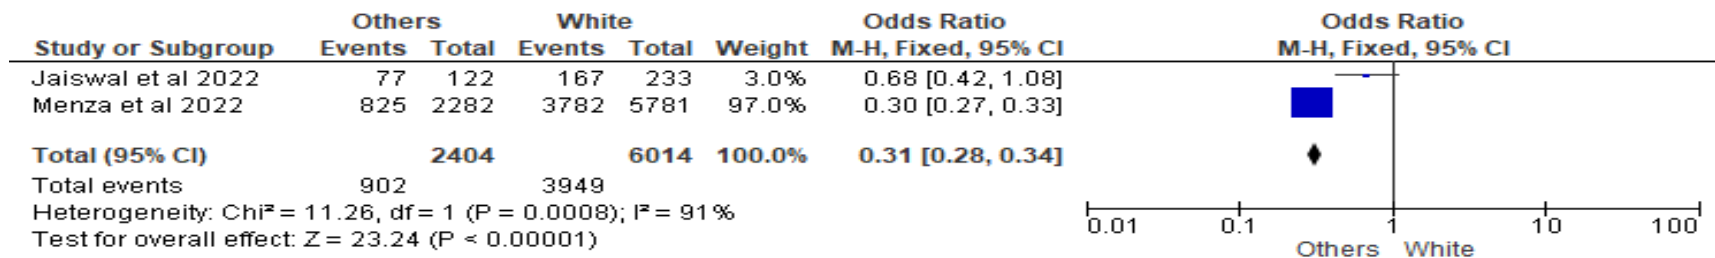

**Supplementary Figure 61: Forest plots of fixed-effects model meta-analysis of Race (Others [Latinx/Hispanic/Mixed race] vs White people) as a determinant of COVID-19 vaccine uptake pooled using the Mantel-Haenszel (M-H) method (n = 2 studies; N = 8,418 participants).** Each blue-colored solid square represents the effect size (odds ratio, OR) of each characteristic, while the ends of the adjoining horizontal lines represent lower (left) and upper (right) confidence intervals. The isolated black-colored solid rhombus at the bottom denotes the overall estimated effect size and the 95% CI. All statistics were based on a two-sided t-test. df: degree of freedom.

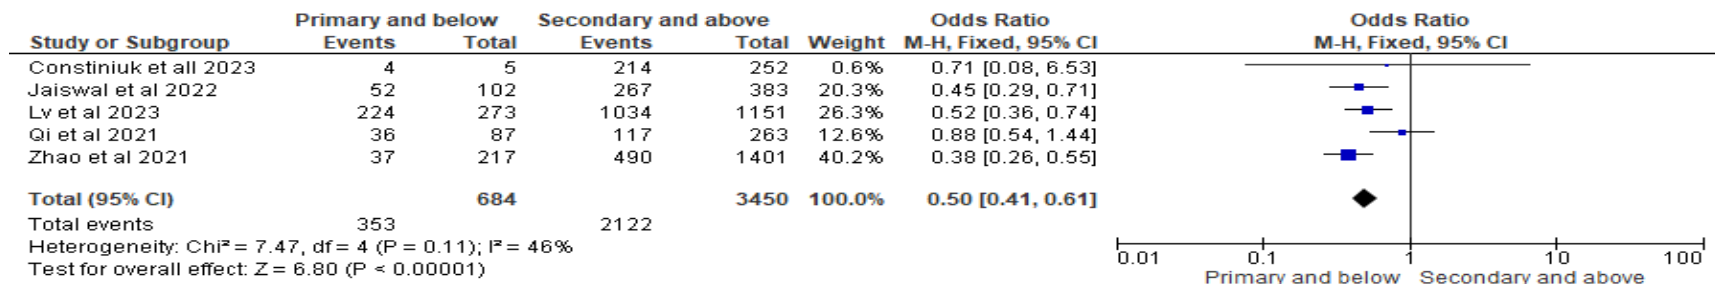

**Supplementary Figure 61: Forest plots of fixed-effects model meta-analysis of educational level as a determinant of COVID-19 vaccine uptake pooled using the Mantel-Haenszel (M-H) method (n = 5 studies; N = 4,134 participants).** Each blue-colored solid square represents the effect size (odds ratio, OR) of each characteristic, while the ends of the adjoining horizontal lines represent lower (left) and upper (right) confidence intervals. The isolated black-colored solid rhombus at the bottom denotes the overall estimated effect size and the 95% CI. All statistics were based on a two-sided t-test. df: degree of freedom.

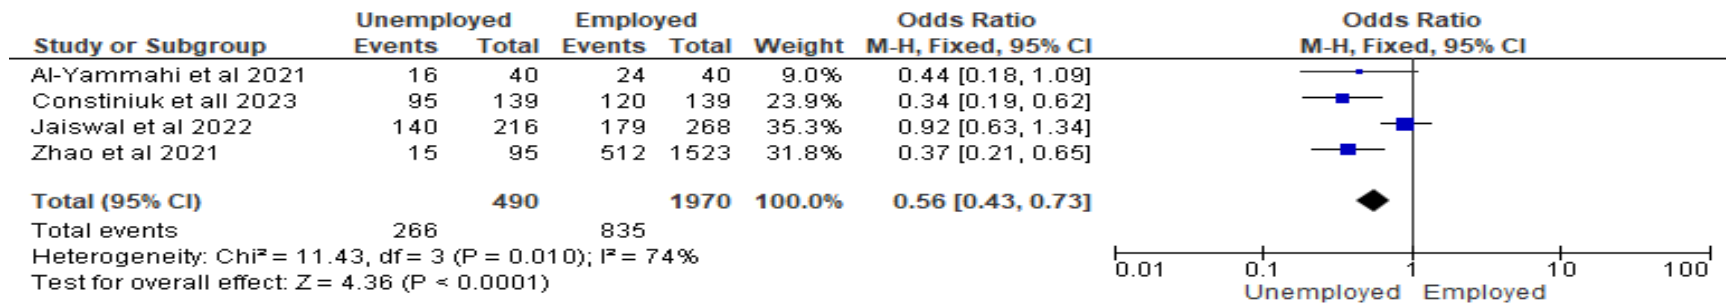

**Supplementary Figure 62: Forest plots of fixed-effects model meta-analysis of employment status as a determinant of COVID-19 vaccine uptake pooled using the Mantel-Haenszel (M-H) method (n = 4 studies; N = 2,460 participants).** Each blue-colored solid square represents the effect size (odds ratio, OR) of each characteristic, while the ends of the adjoining horizontal lines represent lower (left) and upper (right) confidence intervals. The isolated black-colored solid rhombus at the bottom denotes the overall estimated effect size and the 95% CI. All statistics were based on a two-sided t-test. df: degree of freedom.

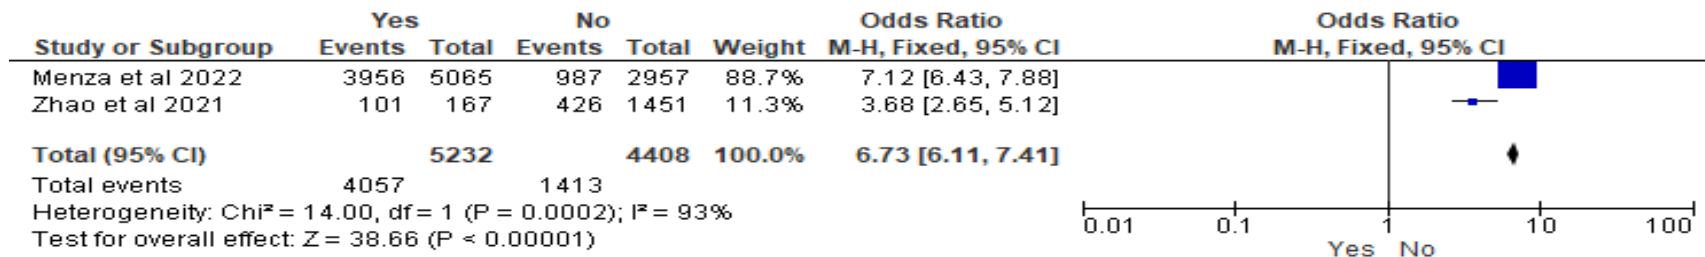

**Supplementary Figure 63: Forest plots of fixed-effects model meta-analysis of influenza vaccination as a determinant of COVID-19 vaccine uptake pooled using the Mantel-Haenszel (M-H) method (n = 2 studies; N = 9,640 participants). Each blue-colored solid square represents the effect size (odds ratio, OR) of each characteristic, while the ends of the adjoining horizontal lines represent lower (left) and upper (right) confidence intervals. The isolated black-colored solid rhombus at the bottom denotes the overall estimated effect size and the 95% CI. All statistics were based on a two-sided t-test. df: degree of freedom.**

## SECTION F

**Table 2: The Preferred Reporting Item for Systematic Reviews and Meta-analysis (PRISMA) 2020 checklist of the present work**

| Section and Topic    | Item # | Checklist item                                                                                                                                                                                                                                                                                                                                          | Location where item is reported |
|----------------------|--------|---------------------------------------------------------------------------------------------------------------------------------------------------------------------------------------------------------------------------------------------------------------------------------------------------------------------------------------------------------|---------------------------------|
| <b>TITLE</b>         |        |                                                                                                                                                                                                                                                                                                                                                         |                                 |
| Title                | 1      | Identify the report as a literature review.                                                                                                                                                                                                                                                                                                             | 1                               |
| <b>ABSTRACT</b>      |        |                                                                                                                                                                                                                                                                                                                                                         |                                 |
| Abstract             | 2      | Provide a structured summary including, as applicable: background; objectives; data sources; study eligibility criteria, participants, and interventions; study appraisal and synthesis methods; results; limitations; conclusions and implications of key findings. See the <a href="#">PRISMA 2020 for Abstracts checklist</a> for the complete list. | 1                               |
| <b>INTRODUCTION</b>  |        |                                                                                                                                                                                                                                                                                                                                                         |                                 |
| Rationale            | 3      | Describe the rationale for the review in the context of existing knowledge, i.e., what is already known about your topic.                                                                                                                                                                                                                               | 2, 3                            |
| Objectives           | 4      | Provide an explicit statement of the objective(s) or question(s) the review addresses with reference to participants, interventions, comparisons, outcomes, and study design (PICOS).                                                                                                                                                                   | 3                               |
| <b>METHODS</b>       |        |                                                                                                                                                                                                                                                                                                                                                         |                                 |
| Eligibility criteria | 5      | Specify the inclusion and exclusion criteria for the review and how studies were grouped for the syntheses with study characteristics (e.g., PICOS, length of follow-up) and report characteristics (e.g., years considered, language, publication status) used as criteria for                                                                         | 21                              |

| Section and Topic             | Item # | Checklist item                                                                                                                                                                                                                                                                                                                                              | Location where item is reported |
|-------------------------------|--------|-------------------------------------------------------------------------------------------------------------------------------------------------------------------------------------------------------------------------------------------------------------------------------------------------------------------------------------------------------------|---------------------------------|
|                               |        | eligibility, giving rationale.                                                                                                                                                                                                                                                                                                                              |                                 |
| Information sources           | 6      | Specify all databases, registers, websites, organisations, reference lists and other sources searched or consulted to identify studies. Specify the date when each source was last searched or consulted.                                                                                                                                                   | 20                              |
| Search strategy               | 7      | Present the full search strategies for all databases, registers and websites, including any filters and limits used.                                                                                                                                                                                                                                        | 20                              |
| Selection process             | 8      | State the process for selecting studies (i.e., screening, eligibility).<br>Specify the methods used to decide whether a study met the inclusion criteria of the review, including how many reviewers screened each record and each report retrieved, whether they worked independently, and if applicable, details of automation tools used in the process. | 20,21                           |
| Study risk of bias assessment | 11     | Specify the methods used to assess risk of bias in the included studies, including details of the tool(s) used, how many reviewers assessed each study and whether they worked independently, and if applicable, details of automation tools used in the process.                                                                                           | 23                              |
| <b>RESULTS</b>                |        |                                                                                                                                                                                                                                                                                                                                                             |                                 |
| Study selection               | 16 a   | Describe the results of the search and selection process, from the number of records identified in the search to the number of studies included in the review, ideally using a flow diagram.                                                                                                                                                                | 6, 7                            |
|                               | 16 b   | Cite studies that might appear to meet the inclusion criteria, but which were excluded, and explain why they were excluded.                                                                                                                                                                                                                                 | 6                               |
| Study characteristics         | 17     | Cite each included study and present its characteristics (e.g., study size, PICOS, follow-up period).                                                                                                                                                                                                                                                       | 7 - 9                           |
| Risk of bias in studies       | 18     | Present assessments of risk of bias for each included study.                                                                                                                                                                                                                                                                                                | 8,9                             |
| Results of individual studies | 19     | For all outcomes, present, for each study: (a) summary statistics for each group (where appropriate) and (b) an effect estimate and its precision (e.g. confidence/credible interval), ideally using structured tables or plots.                                                                                                                            | 9 - 14                          |

| Section and Topic                               | Item # | Checklist item                                                                                                                                                                                                                             | Location where item is reported |
|-------------------------------------------------|--------|--------------------------------------------------------------------------------------------------------------------------------------------------------------------------------------------------------------------------------------------|---------------------------------|
| <b>DISCUSSION</b>                               |        |                                                                                                                                                                                                                                            |                                 |
| Discussion                                      | 23 a   | Provide a general interpretation of the results in the context of other evidence.                                                                                                                                                          | 14 - 19                         |
|                                                 | 23 b   | Discuss any limitations of the evidence included in the review.                                                                                                                                                                            | 19                              |
|                                                 | 23 c   | Discuss any limitations of the review processes used.                                                                                                                                                                                      | 19                              |
|                                                 | 23 d   | Discuss implications of the results for practice, policy, and future research.                                                                                                                                                             | 20                              |
| <b>OTHER INFORMATION</b>                        |        |                                                                                                                                                                                                                                            |                                 |
| Registration and protocol                       | 24 a   | Provide registration information for the review, including register name and registration number, or state that the review was not registered.                                                                                             | 21                              |
|                                                 | 24 b   | Indicate where the review protocol can be accessed, or state that a protocol was not prepared.                                                                                                                                             | 20                              |
|                                                 | 24 c   | Describe and explain any amendments to information provided at registration or in the protocol.                                                                                                                                            | 21 to 25                        |
| Support                                         | 25     | Describe sources of financial or non-financial support for the review, and the role of the funders or sponsors in the review.                                                                                                              | 26                              |
| Competing interests                             | 26     | Declare any competing interests of review authors.                                                                                                                                                                                         | 26                              |
| Availability of data, code, and other materials | 27     | Report which of the following are publicly available and where they can be found: template data collection forms; data extracted from included studies; data used for all analyses; analytic code; any other materials used in the review. | 26                              |

Reference source: Page MJ, McKenzie JE, Bossuyt PM, Boutron I, Hoffmann TC, Mulrow CD, et al. The PRISMA 2020 statement: an updated guideline for reporting systematic reviews. *BMJ* 2021;372:n71. doi: 10.1136/bmj.n71

## SECTION G

**Table 3. The literature search strategy used across all databases used**

|                                                                                                                                                                                                                                                                                                                                                                                                                                                                                                                                                                                                                                                                                                                                                                                                                                                                                  |
|----------------------------------------------------------------------------------------------------------------------------------------------------------------------------------------------------------------------------------------------------------------------------------------------------------------------------------------------------------------------------------------------------------------------------------------------------------------------------------------------------------------------------------------------------------------------------------------------------------------------------------------------------------------------------------------------------------------------------------------------------------------------------------------------------------------------------------------------------------------------------------|
| <p><b>PUBMED</b></p> <p>Key concepts</p> <p><b>Concept 1: COVID-19</b></p> <p>("COVID-19"[Mesh] OR "SARS-CoV-2"[Mesh] OR covid* OR coronavirus* OR 2019-ncov OR sars-cov-2 OR cov-19)</p> <p><b>Concept 2: Vaccine</b></p> <p>("Vaccines"[Mesh] OR "COVID-19 Vaccines"[Mesh] OR vaccin* OR immuniz*)</p> <p><b>Concept 3: Hesitancy, Uptake, Refusal, Acceptance</b></p> <p>("Vaccination Hesitancy"[Mesh] OR "Vaccination Refusal"[Mesh] OR hesitan* OR uptake OR accept* OR refus* OR declin* OR intension* OR intend* OR intent* OR willing*)</p> <p><b>Concepts 4: Determinants</b></p> <p>(determinant* OR factor* OR cause* OR predictor* OR "risk factor*")</p> <p><b>Concept 5: PLHIV</b></p> <p>("HIV"[Mesh] OR "people living with hiv" OR "patients living with hiv" OR plwh OR plwha OR plhiv)</p> <p><b>Combination</b></p> <p><b>1 AND 2 AND (3OR 4) AND 5</b></p> |
| <p><b>COCHRANE</b></p> <p>Cochrane Database of Systematic Reviews, Cochrane Central Register of Controlled Trials, APA PsycInfo, CINAHL – ( covid* OR coronavirus* OR 2019-ncov OR sars-cov-2 OR cov-19 ) AND (vaccin* OR immuniz*) AND (hesitan* OR uptake OR</p>                                                                                                                                                                                                                                                                                                                                                                                                                                                                                                                                                                                                               |

|                                                                                                                                                                                                                                                                                                                                                                                                                                                                                                                                                                                                                                                                                                   |
|---------------------------------------------------------------------------------------------------------------------------------------------------------------------------------------------------------------------------------------------------------------------------------------------------------------------------------------------------------------------------------------------------------------------------------------------------------------------------------------------------------------------------------------------------------------------------------------------------------------------------------------------------------------------------------------------------|
| accept* OR refus* OR declin* OR determinant* OR factor* OR cause* OR predictor* OR "risk factor*" OR intension* OR intend* OR intent* OR willing*) AND ("people living with hiv" OR "patients living with hiv" OR plwh OR plwha OR plhiv)                                                                                                                                                                                                                                                                                                                                                                                                                                                         |
| <p><b>SCOPUS</b></p> <p>TITLE-ABS-KEY (covid* OR coronavirus* OR 2019-ncov OR sars-cov-2 OR cov-19) AND TITLE-ABS-KEY ( vaccin* OR immuniz* ) AND TITLE-ABS-KEY ( hesitan* OR uptake OR accept* OR refus* OR declin* OR determinant* OR factor* OR cause* OR predictor* OR "risk factor*" OR intension* OR intend* OR intent* OR willing* ) AND TITLE-ABS-KEY ( "people living with hiv" OR "patients living with hiv" OR plwh OR plwha OR plhiv )</p>                                                                                                                                                                                                                                            |
| <p><b>GOOGLE SCHOLAR</b></p> <p><b>EMBASE</b></p> <p><b>Concept 1:</b></p> <p>("severe acute respiratory syndrome coronavirus 2*" OR ("SARS-CoV-2*" NEAR/3 "corona*") OR "coronavirus disease 2019*") OR "COVID-19*") OR "2019-ncov*")kw.</p> <p><b>Concept 2:</b></p> <p>("vaccin*" OR "vaccination*" OR "immunization*" OR "immunisation*" OR "vaccination hesitancy*" OR "reluctance*" OR "resistance*" OR "refusal*" OR "acceptance*" OR "willingness*" OR "behavi*" OR "uptake*" OR "coverage*" OR "barriers*" OR "factor*" OR "opinion*" OR "determinant*" OR respons* OR "predictor*" OR "intention*" OR "intention*" OR "decline*" OR "decision*")kw</p> <p><b>Concept 3: 1 AND 2</b></p> |
| <p><b>WEB OF SCIENCE</b></p> <p><b>Concept 1:</b></p> <p>TI= ("severe acute respiratory syndrome coronavirus 2*" OR ("SARS-CoV-2*" NEAR/3 "corona*") OR "coronavirus disease 2019*") OR "COVID-19*") OR "2019-ncov*") AB= ("severe acute respiratory syndrome coronavirus 2*" OR ("SARS-CoV-2*" NEAR/3 "corona *") OR "coronavirus disease 2019*") OR "COVID-19*") OR "2019-ncov*") OR AK= ("severe acute respiratory</p>                                                                                                                                                                                                                                                                         |

syndrome coronavirus 2\*" OR ("SARS-CoV-2\*" NEAR/3 "corona \*") OR "coronavirus disease 2019\*" OR "COVID-19\*" OR "2019-ncov\*").

**Concept 2:**

TI=("vaccin\*" OR "vaccination\*" OR "immunization\*" OR "immunisation\*" OR "vaccination hesitancy\*" OR "reluctance\*" OR "resistance\*" OR "refusal\*" OR "acceptance\*" OR "willingness\*" OR "behavi\*" OR "uptake\*" OR "coverage\*" OR "barriers\*" OR "factor\*" OR "opinion\*" OR "determinant\*" OR respons\* OR "predictor\*" OR "intention\*" OR "intention\*" OR "decline\*" OR "decision\*") OR AB= ("vaccin\*" OR "vaccination\*" OR "immunization\*" OR "immunisation\*" OR "vaccination hesitancy\*" OR "reluctance\*" OR "resistance\*" OR "refusal\*" OR "acceptance\*" OR "willingness\*" OR "behavi\*" OR "uptake\*" OR "coverage\*" OR "barriers\*" OR "factor\*" OR "opinion\*" OR "determinant\*" OR respons\* OR "predictor\*" OR "intention\*" OR "intention\*" OR "decline\*" OR "decision\*") OR AK= ("vaccin\*" OR "vaccination\*" OR "immunization\*" OR "immunisation\*" OR "vaccination hesitancy\*" OR "reluctance\*" OR "resistance\*" OR "refusal\*" OR "acceptance\*" OR "willingness\*" OR "behavi\*" OR "uptake\*" OR "coverage\*" OR "barriers\*" OR "factor\*" OR "opinion\*" OR "determinant\*" OR respons\* OR "predictor\*" OR "intention\*" OR "intention\*" OR "decline\*" OR "decision\*")

**Concept 3:**

T1= ("HIV\*" OR "people living with hiv\*" OR "patients living with hiv\*" OR "plwh\*" OR "plwha\*" OR "plhiv\*") OR AB= ("HIV\*" OR "people living with hiv\*" OR "patients living with hiv\*" OR "plwh\*" OR "plwha\*" OR "plhiv\*") OR AK= ("HIV\*" OR "people living with hiv\*" OR "patients living with hiv\*" OR "plwh\*" OR "plwha\*" OR "plhiv\*")

**Concept 4: 1 AND 2 AND 3**

**SECTION H**

### Quality assessment (critical appraisal) of all the included studies

**Table 4.** Risk of bias for included cross-sectional studies in the systematic review.

| Author Reference | Was the sample frame appropriate to address the target population? | Were study participants sampled in an appropriate way? | Was the sample size adequate? | Were the study subjects and the setting described in detail? | Was the data analysis conducted with sufficient coverage of the identified sample? | Were valid methods used for the identification of the condition? | Was the condition measured in a standard, reliable way for all participants? | Was there appropriate statistical analysis? | Was the response rate adequate, and if not, was the low response rate managed appropriately? | Total (%) | Quality level (High >50%, low <50%) |
|------------------|--------------------------------------------------------------------|--------------------------------------------------------|-------------------------------|--------------------------------------------------------------|------------------------------------------------------------------------------------|------------------------------------------------------------------|------------------------------------------------------------------------------|---------------------------------------------|----------------------------------------------------------------------------------------------|-----------|-------------------------------------|
| Qi et al         | 1                                                                  | 1                                                      | 1                             | 1                                                            | 1                                                                                  | 1                                                                | 1                                                                            | 1                                           | NC                                                                                           | 88.89     | High                                |
| Liu              | 1                                                                  | 1                                                      | 1                             | 1                                                            | 1                                                                                  | NC                                                               | 1                                                                            | 1                                           | 1                                                                                            | 88.89     | High                                |
| Yang             | 1                                                                  | 1                                                      | 1                             | 1                                                            | 1                                                                                  | 1                                                                | 1                                                                            | 1                                           | 1                                                                                            | 100       | High                                |
| Wu et al         | 1                                                                  | 1                                                      | 1                             | 1                                                            | 1                                                                                  | NA                                                               | 1                                                                            | 1                                           | 1                                                                                            | 88.90     | High                                |
| Vallée et al     | 1                                                                  | 1                                                      | 1                             | 0                                                            | 1                                                                                  | NA                                                               |                                                                              | 1                                           | 0                                                                                            | 66.70     | High                                |
| Shrestha et al   | 1                                                                  | 1                                                      | 1                             | 1                                                            | 1                                                                                  | 1                                                                | 1                                                                            | 1                                           | 1                                                                                            | 100       | High                                |
| Menza et al      | 1                                                                  | 1                                                      | 1                             | 1                                                            | 1                                                                                  | NA                                                               | 1                                                                            | 1                                           | 1                                                                                            | 88.90     | High                                |

|                     |   |   |    |   |   |    |   |   |    |       |      |
|---------------------|---|---|----|---|---|----|---|---|----|-------|------|
| O'Regan et al       | 1 | 0 | 0  | 1 | 1 | NA | 1 | 1 | NC | 55.56 | High |
| Davtyan et al       | 1 | 1 | 1  | 1 | 1 | NA | 1 | 1 | NC | 77.78 | High |
| Mesfin et al        | 1 | 1 | 1  | 1 | 1 | 1  | 1 | 1 | 1  | 100   | High |
| Kaida et al         | 1 | 1 |    | 1 | 1 | 1  | 1 | 1 | 1  | 100   | High |
| Su et al            | 1 | 1 | 1  | 1 | 1 | 1  | 1 | 1 | 1  | 100   | High |
| Megan et al         | 1 | 1 | 1  | 0 | 1 | 0  | 1 | 1 | 1  | 77.78 | High |
| Iliyasu et al       | 1 | 1 | 1  | 1 | 1 | 1  | 1 | 1 | 1  | 100   | High |
| Chai et al          | 1 | 1 | 1  | 1 | 1 | 1  | 1 | 1 | 1  | 100   | High |
| Jaiswa et al        | 1 | 1 | 1  | 1 | 1 | 1  | 1 | 1 | NC | 88.89 | High |
| Jones et al         | 1 | 1 | 1  | 1 | 1 | 1  | 1 | 1 | 1  | 100   | High |
| Zhao et al          | 1 | 1 | 1  | 1 | 1 | NC | 1 | 1 | 1  | 88.89 | High |
| Zheng et al         | 1 | 1 | 1  | 1 | 1 | 1  | 1 | 1 | 1  | 100   | High |
| Govere-Hwenje et al | 1 | 1 | NC | 1 | 1 | 1  | 1 | 1 | 1  | 88.89 | High |
| Huang et al         | 1 | 1 | 1  | 1 | 1 | 1  | 1 | 1 | 1  | 100   | High |

|                      |   |   |    |   |   |   |   |   |    |        |      |
|----------------------|---|---|----|---|---|---|---|---|----|--------|------|
| Ortiz-Martínez et al | 1 | 1 | 1  | 1 | 1 | 1 | 1 | 1 | NC | 88.89  | High |
| Fulda et al          | 1 | 1 | 1  | 0 | 1 | 1 | 1 | 1 | 1  | 88.89  | High |
| Mohammed et al       | 1 | 1 | 1  | 1 | 1 | 1 | 1 | 1 | 1  | 100    | High |
| Kabir et al          | 1 | 1 | 1  | 1 | 1 | 1 | 1 | 1 | 1  | 100%   | High |
| Donohue et al        | 1 | 1 | 0  | 0 | 1 | 1 | 1 | 1 | 0  | 66.67% | High |
| Holt et al           | 1 | 1 | 1  | 1 | 1 | 1 | 1 | 1 | 1  | 100%   | High |
| Muhindo et al        | 1 | 1 | 1  | 1 | 1 | 1 | 1 | 1 | 1  | 100%   | High |
| Swendeman et al      | 1 | 1 | 1  | 1 | 1 | 1 | 1 | 1 | 1  | 100%   | High |
| Wickersham et al     | 1 | 1 | 1  | 0 | 1 | 1 | 1 | 1 | 1  | 88.89% | High |
| Prestage             | 1 | 1 | 1  | 1 | 1 | 1 | 1 | 1 | 1  | 100%   | High |
| Folayan et al        | 1 | 1 | 1  | 1 | 1 | 1 | 1 | 1 | 1  | 100%   | High |
| Bogart et al         | 1 | 1 | 0  | 1 | 1 | 1 | 1 | 1 | 1  | 88.89% | High |
| Lyons et al          | 1 | 1 | NC | 1 | 1 | 1 | 1 | 1 | NC | 77.78% | High |

|                   |   |   |    |   |   |   |   |   |    |        |      |
|-------------------|---|---|----|---|---|---|---|---|----|--------|------|
| Madzima et al     | 1 | 1 | 1  | 1 | 1 | 1 | 1 | 1 | 1  | 100%   | High |
| Chaudhuri et al   | 1 | 1 | 1  | 1 | 1 | 1 | 1 | 1 | 1  | 100%   | High |
| Prestage          | 1 | 1 | 1  | 1 | 1 | 1 | 1 | 1 | 1  | 100%   | High |
| Siewe Fodjo et al | 1 | 1 | 1  | 1 | 1 | 1 | 1 | 1 | NC | 88.89% | High |
| Bert et al        | 1 | 1 | NC | 0 | 1 | 1 | 1 | 1 | NC | 66.67% | High |
| Shallangwa et al  | 1 | 1 | 1  | 1 | 1 | 1 | 1 | 1 | 1  | 100%   | High |
| Costiniuk et al   | 1 | 1 | 1  | 1 | 1 | 1 | 1 | 1 | 1  | 100    | High |
| Cummings et al    | 1 | 1 | 1  | 1 | 1 | 1 | 1 | 1 | 1  | 100    | High |
| Singh et al       | 1 | 1 | 1  | 1 | 1 | 1 | 0 | 1 | 1  | 88.89  | High |
| Berhie            | 1 | 1 | 0  | 0 | 1 | 0 | 1 | 1 | 1  | 66.67  | High |
| LV et al          | 1 | 1 | 1  | 1 | 1 | 1 | 1 | 1 | 1  | 100    | High |
| Sun               | 1 | 1 | 1  | 0 | 1 | 1 | 1 | 1 | NC | 77.78  | High |
| Mchawa et al      | 1 | 1 | 1  | 1 | 1 | 1 | 1 | 1 | 1  | 100    | High |

|                 |   |   |   |   |   |   |   |   |   |     |      |
|-----------------|---|---|---|---|---|---|---|---|---|-----|------|
| Tunta et al     | 1 | 1 | 1 | 1 | 1 | 1 | 1 | 1 | 1 | 100 | High |
| Wicaksana et al | 1 | 1 | 1 | 1 | 1 | 1 | 1 | 1 | 1 | 100 | High |

**Table 5.** Risk of bias for included cohort studies in the systematic review.

| Author Reference | Were the two groups similar and recruited from the same population? | Were the exposures measured similarly to assign people to both exposed and unexposed groups? | Was the exposure measured in a valid and reliable way? | Were confounding factors identified? | Were strategies to deal with confounding factors stated? | Were the groups/participants free of the outcome at the start of the study (or at the moment of exposure)? | Were the outcomes measured in a valid and reliable way? | Was the follow up time reported and sufficient to be long enough for outcomes to occur? | Was follow up complete, and if not, were the reasons to loss to follow up described and explored? | Were strategies to address incomplete follow-up utilized? | Total (%) | Quality level (High >50%, low <50%) |
|------------------|---------------------------------------------------------------------|----------------------------------------------------------------------------------------------|--------------------------------------------------------|--------------------------------------|----------------------------------------------------------|------------------------------------------------------------------------------------------------------------|---------------------------------------------------------|-----------------------------------------------------------------------------------------|---------------------------------------------------------------------------------------------------|-----------------------------------------------------------|-----------|-------------------------------------|
| Baker et al      | 1                                                                   | 1                                                                                            | 1                                                      | 1                                    | 0                                                        | 0                                                                                                          | 1                                                       | 1                                                                                       | 1                                                                                                 | 0                                                         | 70        | High                                |

|                  |   |   |   |   |    |   |   |   |   |    |     |      |
|------------------|---|---|---|---|----|---|---|---|---|----|-----|------|
| Hechter et al    |   |   |   |   |    |   |   |   |   |    |     |      |
| Rosenthal et al  | 1 | 1 | 1 | 1 | NC | 1 | 1 | 1 | 1 | NA | 80  | High |
| Strathdee et al  | 1 | 1 | 1 | 1 | 1  | 1 | 1 | 1 | 1 | 1  | 100 | High |
| Javanbakht et al | 1 | 1 | 1 | 1 | 1  | 1 | 1 | 1 | 1 | NC | 90  | High |
